# Supplementary material for: Structures and relative stability of hydrated ferrous ion clusters and temperature effects
Source: Royal Society of Chemistry journal article supplement (doi:10.1039/d1nj01849c), 2021-01-01
Supplement: d1nj01849c1.pdf [file d1nj01849c1.pdf]

# Structures and relative stabilities of hydrated ferrous ion clusters and temperatures effects

(Supporting information)

Ousman Boukar<sup>a</sup>, Jean Jules Fifen<sup>\*,b</sup>, Nsangou Mama<sup>a</sup>, Hassen Ghalila<sup>c</sup> and Jeanet Conradie<sup>d</sup>

<sup>a</sup>Department of Physics, Faculty of Science, University of Maroua, P. O. Box 46, Maroua  
Cameroon

<sup>b</sup>Department of Physics, Faculty of Science, University of Ngaoundere, P.O.BOX 454, Ngaoundere,  
Cameroon.

<sup>c</sup>Faculty of Science, University of Tunis El Manar, PO Box 2092, Tunis, Tunisia

<sup>d</sup>Department of Chemistry, University of the Free State, PO Box 339, Bloemfontein, 9300, South  
Africa

## Content

### List of figures

|                                                                                                                                                                               |    |
|-------------------------------------------------------------------------------------------------------------------------------------------------------------------------------|----|
| Figure 1s : Gas-phase structures of $\text{Fe}^{2+}(\text{H}_2\text{O})_{n=1-3}$ clusters.....                                                                                | 3  |
| Figure 2s : Gas-phase structures of $\text{Fe}^{2+}(\text{H}_2\text{O})_{n=4}$ clusters. ....                                                                                 | 4  |
| Figure 3s : Gas-phase structures $\text{Fe}^{2+}(\text{H}_2\text{O})_{n=5}$ clusters. ....                                                                                    | 5  |
| Figure 4s : Gas-phase structures of $\text{Fe}^{2+}(\text{H}_2\text{O})_{n=6}$ clusters. ....                                                                                 | 6  |
| Figure 5s : Gas-phase structures of $\text{Fe}^{2+}(\text{H}_2\text{O})_{n=7}$ clusters. ....                                                                                 | 7  |
| Figure 6s : Gas-phase structures of $\text{Fe}^{2+}(\text{H}_2\text{O})_{n=8}$ clusters. ....                                                                                 | 8  |
| Figure 7s : Gas-phase structures of $\text{Fe}^{2+}(\text{H}_2\text{O})_{n=9}$ clusters. ....                                                                                 | 9  |
| Figure 8s : Gas-phase structures of $\text{Fe}^{2+}(\text{H}_2\text{O})_{n=10}$ clusters.....                                                                                 | 10 |
| Figure 9s : Gas phase clustering energies of $\text{Fe}^{2+}(\text{H}_2\text{O})_n$ , $\text{Fe}^{2+}(\text{NH}_3)_n$ and $\text{Cu}^{2+}(\text{H}_2\text{O})_n$ complex..... | 11 |

---

## List of Tables

|                                                                                                                                                                                                                                                                |    |
|----------------------------------------------------------------------------------------------------------------------------------------------------------------------------------------------------------------------------------------------------------------|----|
| Table 1s : Relative zero-point electronic energies of all isomers presented in this work (in kJ/mol) and calculated at the MP2/6-31++G(d,p) level of theory. ....                                                                                              | 12 |
| Table 2s : Temperature dependence of the relative free energies between the High spin state (HS) and the Low spin state (LS) of $\text{Fe}^{2+}(\text{H}_2\text{O})_{n=1}$ (in kJ/mol). Calculations are performed at MP2-6-31++G(d,p) level of theory .....   | 16 |
| Table 3s : Temperature dependence of the relative free energies between the High spin state (HS) and the Low spin state (LS) of $\text{Fe}^{2+}(\text{H}_2\text{O})_{n=2}$ (in kJ/mol). Calculations are performed at MP2-6-31++G(d,p) level of theory .....   | 17 |
| Table 4s : Temperature dependence of the relative free energies between the High spin state (HS) and the Low spin state (LS) of $\text{Fe}^{2+}(\text{H}_2\text{O})_{n=3}$ (in kJ/mol). Calculations are performed at MP2-6-31++G(d,p) level of theory .....   | 18 |
| Table 5s : Temperature dependence of the relative free energies between the High spin state (HS) and the Low spin state (LS) of $\text{Fe}^{2+}(\text{H}_2\text{O})_{n=4}$ (in kJ/mol). Calculations are performed at MP2-6-31++G(d,p) level of theory .....   | 19 |
| Table 6s : Temperature dependence of the relative free energies between the High spin state (HS) and the Low spin state (LS) of $\text{Fe}^{2+}(\text{H}_2\text{O})_{n=5}$ (in kJ/mol). Calculations are performed at MP2-6-31++G(d,p) level of theory .....   | 20 |
| Table 7s : Temperature dependence of the relative free energies between the High spin state (HS) and the Low spin state (LS) of $\text{Fe}^{2+}(\text{H}_2\text{O})_{n=6}$ (in kJ/mol). Calculations are performed at MP2-6-31++G(d,p) level of theory .....   | 21 |
| Table 8s : Temperature dependence of the relative free energies between the High spin state (HS) and the Low spin state (LS) of $\text{Fe}^{2+}(\text{H}_2\text{O})_{n=7}$ (in kJ/mol). Calculations are performed at MP2-6-31++G(d,p) level of theory .....   | 22 |
| Table 9s : Temperature dependence of the relative free energies between the High spin state (HS) and the Low spin state (LS) of $\text{Fe}^{2+}(\text{H}_2\text{O})_{n=8}$ (in kJ/mol). Calculations are performed at MP2-6-31++G(d,p) level of theory .....   | 23 |
| Table 10s : Temperature dependence of the relative free energies between the High spin state (HS) and the Low spin state (LS) of $\text{Fe}^{2+}(\text{H}_2\text{O})_{n=9}$ (in kJ/mol). Calculations are performed at MP2-6-31++G(d,p) level of theory .....  | 24 |
| Table 11s : Temperature dependence of the relative free energies between the High spin state (HS) and the Low spin state (LS) of $\text{Fe}^{2+}(\text{H}_2\text{O})_{n=10}$ (in kJ/mol). Calculations are performed at MP2-6-31++G(d,p) level of theory ..... | 25 |

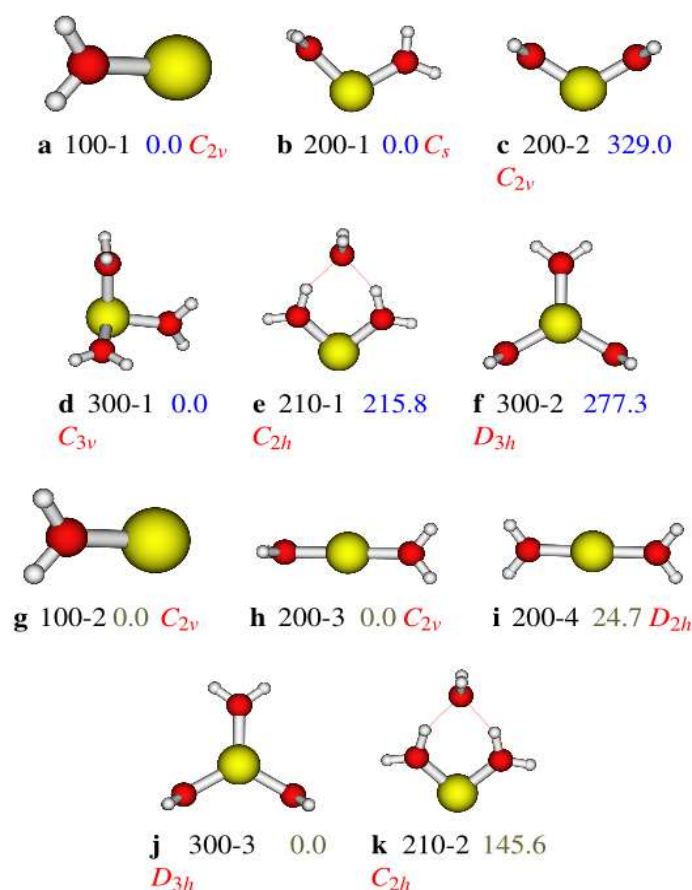

**Figure 1s** : Gas-phase structures of  $\text{Fe}^{2+}(\text{H}_2\text{O})_{n=1-3}$  clusters.

Numbers in blue represent the zero-point-corrected relative electronic energies (ZEE) of isomers in the singlet spin-state. Numbers in gray color represent the ZEE of isomers in the quintet spin. All these numbers are in kJ/mol. Symmetry point group of each structure is indicated in red when different from  $C_1$ . It should be noted here that for each figure, we first present the singlet spin state structures and then the quintet spin state ones. The high energy gaps between various isomers of a given cluster favor the global minimum ZEE structure to be the most stable at all temperatures in both spin states. Note also that structures **200-4**, **210-1**, **210-2** and **300-2** are presented here to the cluster community for the first time.

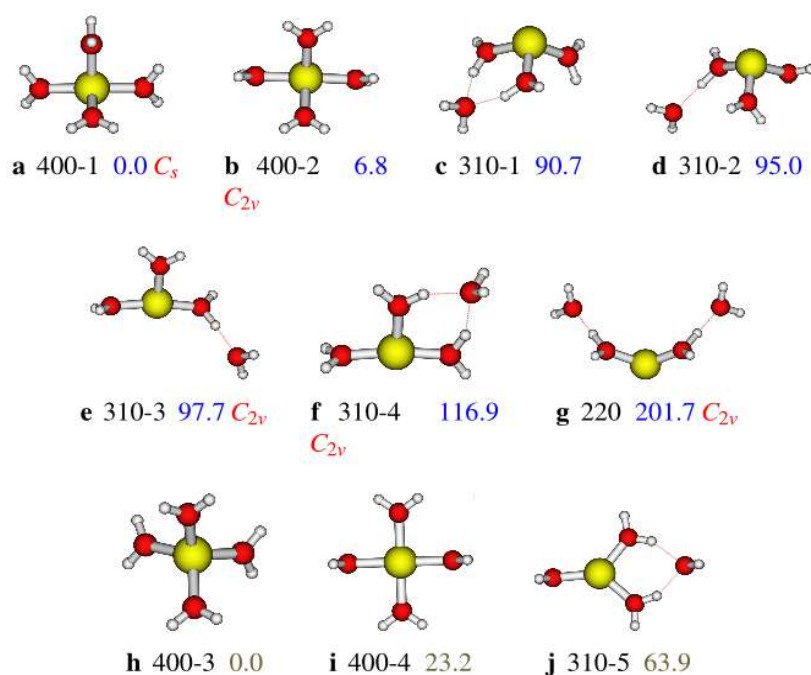

**Figure 2s** : Gas-phase structures of  $\text{Fe}^{2+}(\text{H}_2\text{O})_{n=4}$  clusters.

See the caption of **Figure 1s** for definitions of terms. Singlet spin state results are presented through structures in **a** to **g** while quintet spin state geometries are presented by structures in **h**, **i** and **j**. As the relative energies between isomers are high in the quintet spin state, we can anticipate that the global minimum ZEE structure (**400-3**) dominates the population at all temperatures. In regard of the small ZEE between **400-1** and **400-2** as compared to other isomers in the lowest spin state, we expect a strong competition between these isomers as the temperature increases. Note also that all the structures are presented here to the cluster community for the first time, except the global minimum ZEE structure for each spin state (**400-1** and **400-3**, respectively)

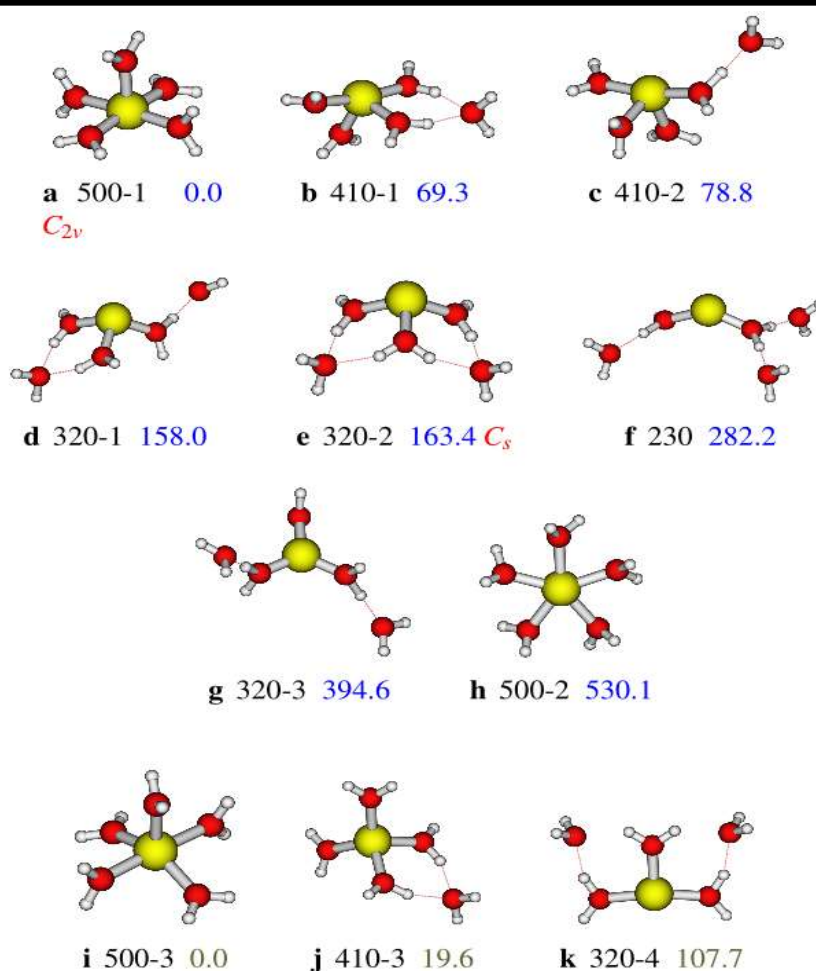

**Figure 3s** : Gas-phase structures  $Fe^{2+}(H_2O)_{n=5}$  clusters.

See the caption of **Figure 1s** for definitions of terms. Singlet spin state results are presented through structures in **a** to **h** while quintet spin state geometries are presented by structures in **i**, **j** and **k**. As the relative energies between isomers are very high in both spin state, we can anticipate that the global minimum ZEE structure for each spin state will dominate exclusively the population at all temperatures. Note also that all the structures are presented here to the cluster community for the first time, except the global minimum ZEE structure for each spin state (**500-1** and **500-3**, respectively).

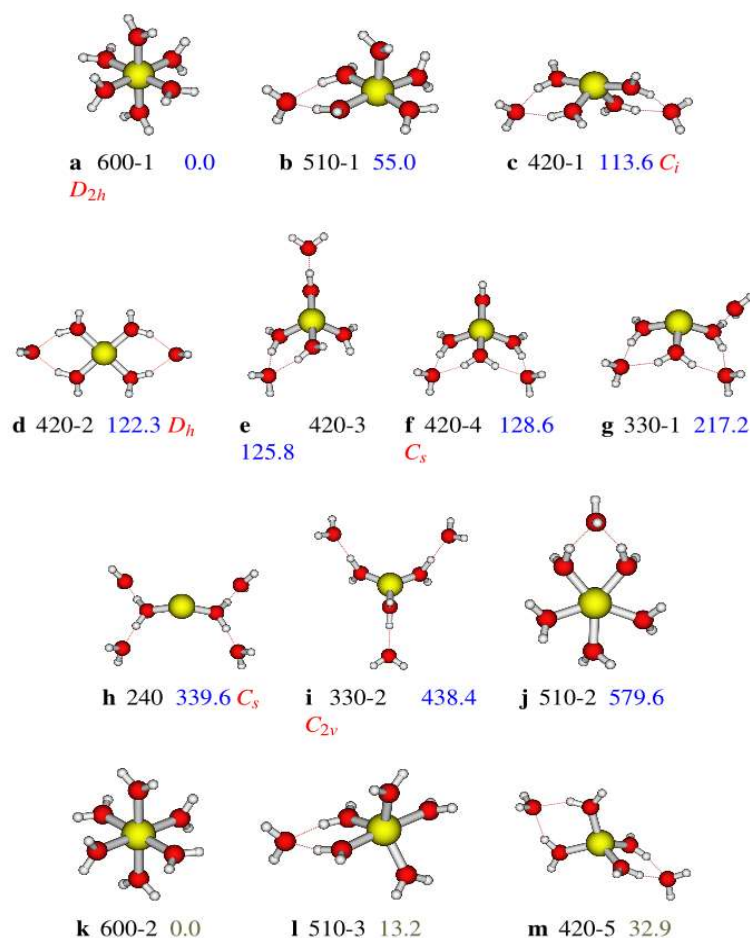

**Figure 4s** : Gas-phase structures of  $\text{Fe}^{2+}(\text{H}_2\text{O})_{n=6}$  clusters.

See the caption of **Figure 1s** for definitions of terms. Singlet spin state results are presented through structures in **a** to **j** while quintet spin state geometries are presented by structures in **k**, **l** and **m**. As the relative energies between isomers are very high in both spin state, we can anticipate that the global minimum ZEE structure for each spin state will dominate exclusively the population at all temperatures. Note also that all the structures are presented here to the cluster community for the first time, except the global minimum ZEE structure for each spin state (**600-1** and **600-2**, respectively).

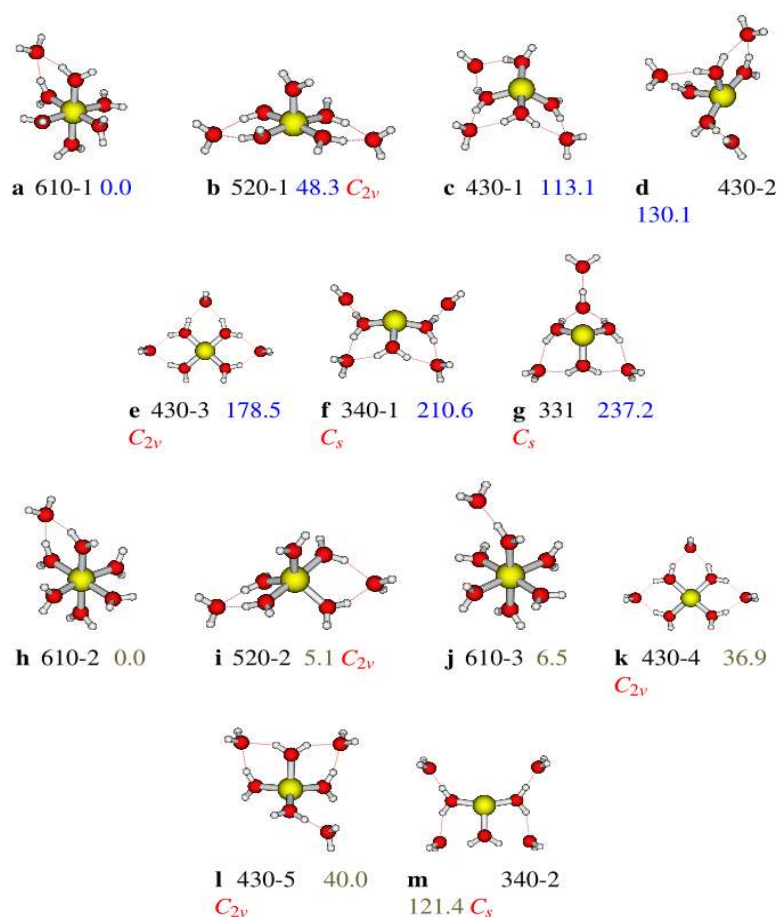

**Figure 5s** : Gas-phase structures of  $\text{Fe}^{2+}(\text{H}_2\text{O})_{n=7}$  clusters.

See the caption of **Figure 1s** for definitions of terms. Singlet spin state results are presented through structures in **a** to **g** while quintet spin state geometries are presented by structures in **h**, to **m**. As the relative energies between the first four isomers are close in both spin state, we can anticipate a strong competition of these structures in the population of the heptamer at high temperature. Note also that all the structures are presented here to the cluster community for the first time, except the global minimum ZEE structure in the quintet spin state (**610-1**)

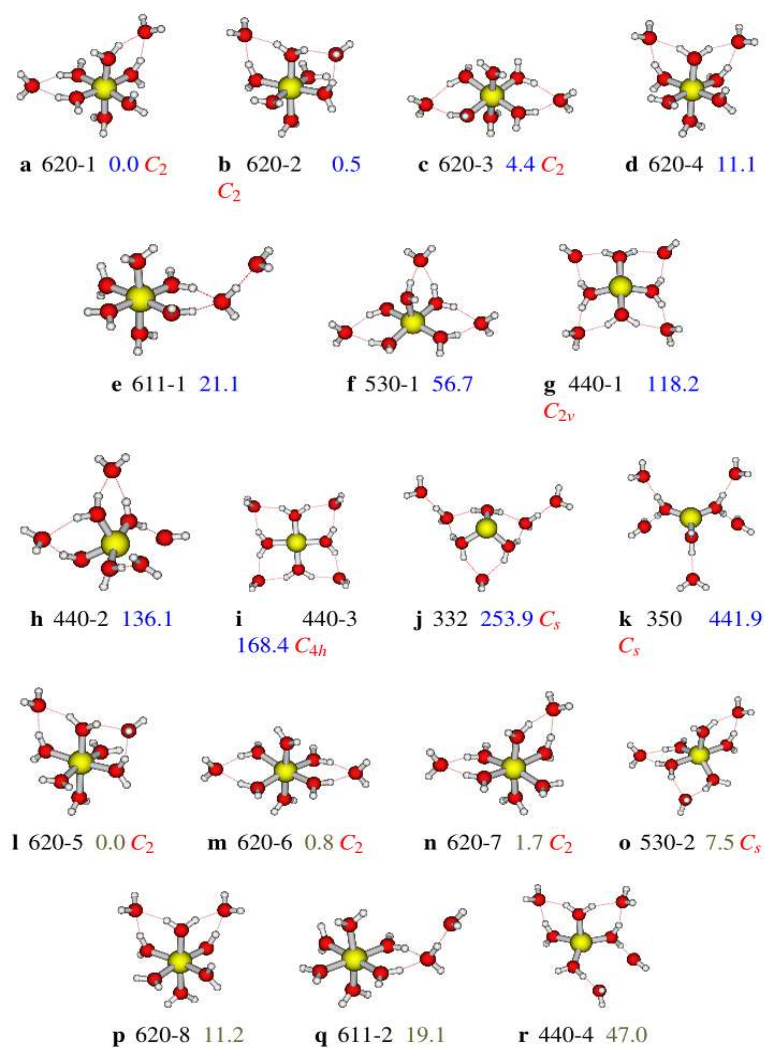

**Figure 6s** : Gas-phase structures of  $Fe^{2+}(H_2O)_n=8$  clusters.

See the caption **Figure 1s** for definitions of terms. Singlet spin state results are presented through structures in **a** to **k** while quintet spin state geometries are presented by structures in **l**, to **r**. As the relative energies between the first four isomers are close in both spin states, we can anticipate a strong competition of these structures in the population of the octamer at high temperature. Note also that all the structures are presented here to the cluster community for the first time, except **620-5** and **620-6**.



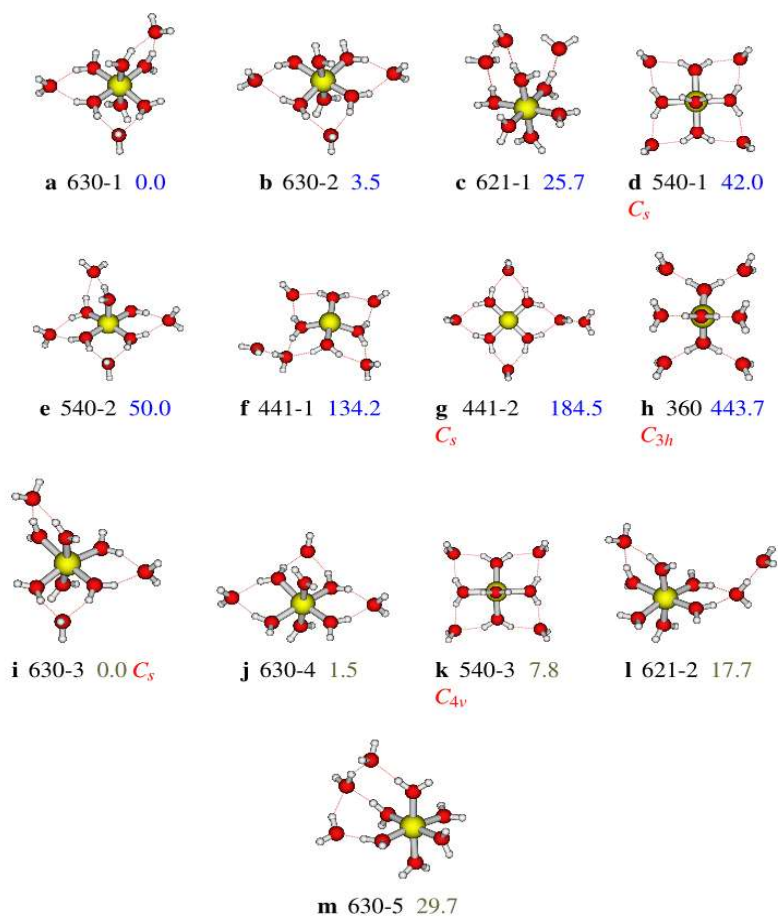

**Figure 7s** : Gas-phase structures of  $\text{Fe}^{2+}(\text{H}_2\text{O})_{n=9}$  clusters.

See the caption **Figure 1s** for definitions of terms. Singlet spin state results are presented through structures in **a** to **h** while quintet spin state geometries are presented by structures in **i** to **m**. As the relative energies between the first three isomers are close in both spin state, we can anticipate a strong competition of these structures in the population of the nonamer at high temperature. Note also that all the structures are presented here to the cluster community for the first time, except the global minimum ZEE in the quintet spin state (**630-3**).

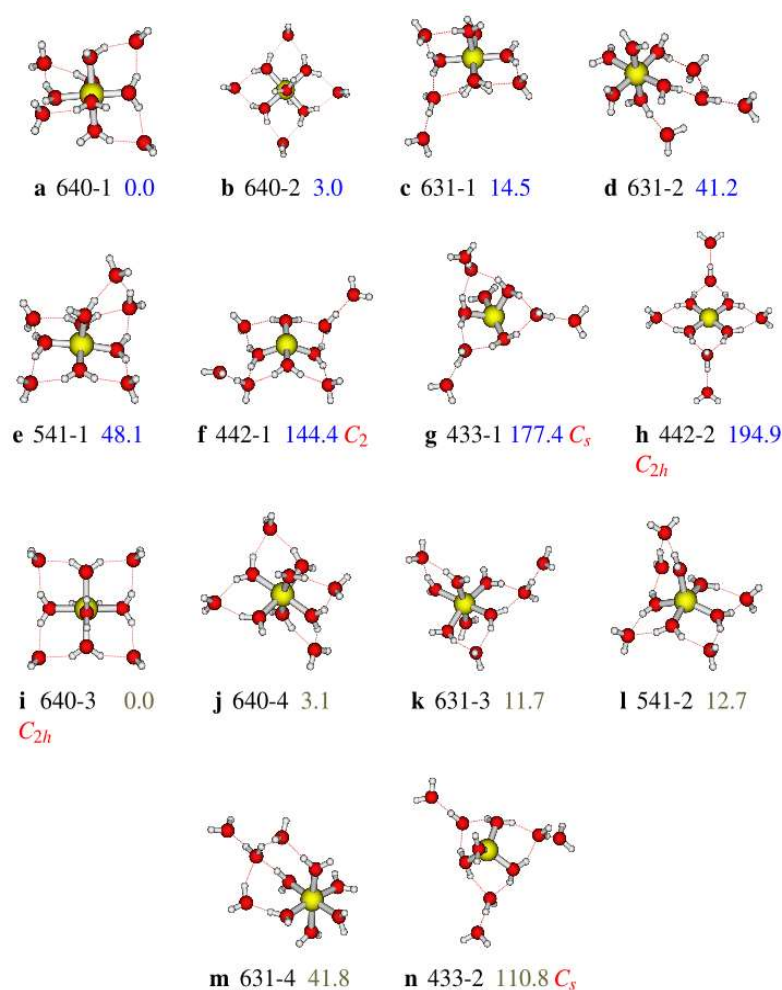

**Figure 8s** : Gas-phase structures of  $Fe^{2+}(H_2O)_n=10$  clusters.

See the caption of **Figure 1s** for definitions of terms. Singlet spin state results are presented through structures in **a** to **h** while quintet spin state geometries are presented by structures in **i**, to **n**. As the relative energies between the first three isomers are close in both spin state, we can anticipate a strong competition of these structures in the population of the decamer at high temperature. Note also that all the structures are presented here to the cluster community for the first time, except **640-4**, which is not the global minimum ZEE structure.

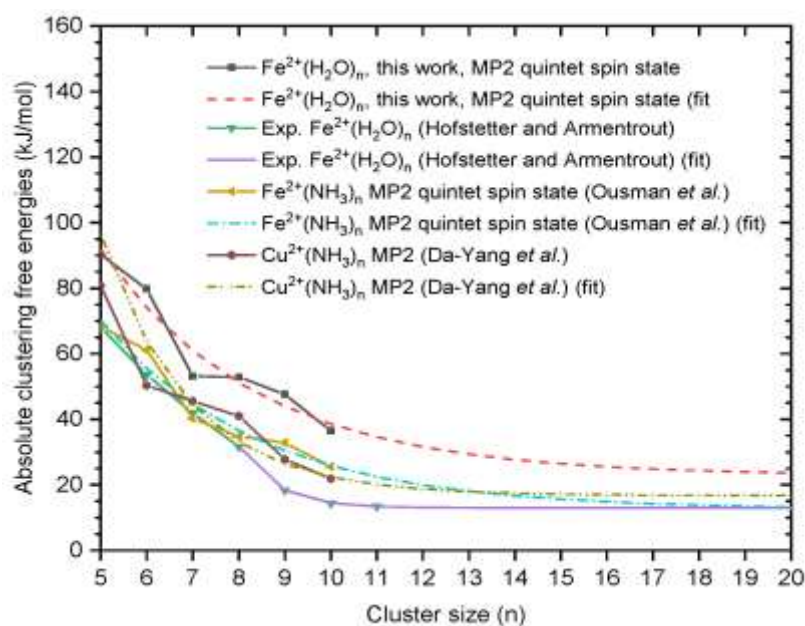

**Figure 9s** : Gas phase clustering energies of Fe<sup>2+</sup>(H<sub>2</sub>O)<sub>n</sub>, Fe<sup>2+</sup>(NH<sub>3</sub>)<sub>n</sub> and Cu<sup>2+</sup>(H<sub>2</sub>O)<sub>n</sub> complex.

Absolute clustering free energies of complexes Fe<sup>2+</sup>(H<sub>2</sub>O)<sub>n</sub>, Fe<sup>2+</sup>(NH<sub>3</sub>)<sub>n</sub> and Cu<sup>2+</sup>(H<sub>2</sub>O)<sub>n</sub>. The experimental clustering free energies of the complex have been excellently extrapolated by the function  $n \in N^* \mapsto A_1 \exp\left(-\frac{n}{B_1}\right) + c_1$ . with the parameters  $(A_1, B_1, C_1)$  optimized to **(409410.27, 0.80, 12.98)**. Our previously calculated clustering free energies of the cluster Fe<sup>2+</sup>(NH<sub>3</sub>)<sub>n</sub> at the MP2/6-31++G(d,p) level of theory can be excellently reproduced or extrapolated by the function  $n \in N^* \mapsto A_2 \exp\left(-\frac{n}{B_2}\right) + c_2$ . with the parameters  $(A_2, B_2, C_2)$  optimized to **(248.7005, 3.4162, 12.5396)**. The associated root mean square error and the correlation coefficient between the fitted and the calculated clustering free energies are RMSE = 1.2 kJ/mol and  $R^2 = 0.9569$ , respectively.

Our previously calculated clustering free energies of the cluster Cu<sup>2+</sup>(NH<sub>3</sub>)<sub>n</sub> at the MP2/6-31++G(d,p) level of theory can be excellently reproduced or extrapolated by the function  $n \in N^* \mapsto A_3 \exp\left(-\frac{n}{B_3}\right) + c_3$ . with the parameters  $(A_3, B_3, C_3)$  optimized to (1114.8160, 1.8938, 16.7463). The associated correlation coefficient between the fitted and the calculated clustering free energies is  $R^2 = 0.9999$ . Finally, the calculated clustering free energies of the cluster Fe<sup>2+</sup>(H<sub>2</sub>O)<sub>n</sub> can be excellently reproduced or extrapolated by the function  $n \in N^* \mapsto A_4 \exp\left(-\frac{n}{B_4}\right) + c_4$ . With the parameters  $(A_4, B_4, C_4)$  optimized to **(4.457 × 10<sup>-2</sup>, 3.446, 5.914)**. The associated root mean square error and the correlation coefficient between the fitted and the calculated clustering free energies are **RMSE = 3.73 kJ/mol** and  $R^2 = 0.944$ , respectively.

**Table 1s : Relative zero-point electronic energies of all isomers presented in this work (in kJ/mol) and calculated at the MP2/6-31++G(d,p) level of theory.**

| Structures                | Relative energies at HS | Relative energies at LS |
|---------------------------|-------------------------|-------------------------|
| <b>The monomer (n=1)</b>  |                         |                         |
| 100-1                     | -                       | 0.0                     |
| 100-2                     | 0.0                     | -                       |
| <b>The dimer (n=2)</b>    |                         |                         |
| 200-1                     | -                       | 0.0                     |
| 200-2                     | -                       | 329.0                   |
| 200-3                     | 0.0                     |                         |
| 200-4                     | 24.7                    |                         |
| <b>The trimer (n=3)</b>   |                         |                         |
| 300-1                     | -                       | 0.0                     |
| 300-2                     | -                       | 277.3                   |
| 300-3                     | 0.0                     | -                       |
| 210-1                     | -                       | 215.8                   |
| 210-2                     | 145.6                   | -                       |
| <b>The tetramer (n=4)</b> |                         |                         |
| 400-1                     | -                       | 0.0                     |
| 400-2                     | -                       | 6.8                     |
| 400-3                     | 0.0                     | -                       |
| 400-4                     | 23.2                    | -                       |
| 310-1                     | -                       | 90.7                    |
| 310-2                     | -                       | 95.0                    |
| 310-3                     | -                       | 97.7                    |
| 310-4                     | -                       | 116.9                   |
| 310-5                     | 63.9                    | -                       |
| 220                       | 201.7                   | -                       |
| <b>The pentamer (n=5)</b> |                         |                         |
| 500-1                     | -                       | 0.0                     |
| 500-2                     | -                       | 530.1                   |

|                           |       |       |
|---------------------------|-------|-------|
| 500-3                     | 0.0   | -     |
| 410-1                     | -     | 69.3  |
| 410-2                     | -     | 78.8  |
| 410-3                     | 19.6  | -     |
| 320-1                     | -     | 158.0 |
| 320-2                     | -     | 163.4 |
| 320-3                     | -     | 394.6 |
| 320-4                     | 107.1 | -     |
| 230                       | -     | 282.2 |
| <b>The hexamer (n=6)</b>  |       |       |
| 600-1                     | 0.0   | -     |
| 600-2                     | -     | 0.0   |
| 510-1                     | -     | 55.0  |
| 510-2                     | -     | 579.6 |
| 510-3                     | 13.2  | -     |
| 420-1                     | -     | 113.6 |
| 420-2                     | -     | 122.3 |
| 420-3                     | -     | 125.8 |
| 420-4                     | -     | 128.6 |
| 420-5                     | 32.9  | -     |
| 330-1                     | -     | 217.2 |
| 330-2                     | -     | 438.4 |
| 240                       | -     | 339.6 |
| <b>The heptamer (n=7)</b> |       |       |
| 610-1                     | -     | 0.0   |
| 610-2                     | 0.0   | -     |
| 610-3                     | 6.5   | -     |
| 520-1                     | -     | 48.3  |
| 520-2                     | 5.1   | -     |
| 430-1                     | -     | 113.1 |
| 430-2                     | -     | 130.1 |
| 430-3                     | -     | 178.5 |
| 430-4                     | 36.9  | -     |

|                          |       |       |
|--------------------------|-------|-------|
| 430-5                    | 40.0  | -     |
| 340-1                    | -     | 210.6 |
| 340-2                    | 121.4 | -     |
| 331                      | -     | 237.2 |
| <b>The octamer (n=8)</b> |       |       |
| 620-1                    | -     | 0.0   |
| 620-2                    | -     | 0.5   |
| 620-3                    | -     | 4.4   |
| 620-4                    | -     | 11.1  |
| 620-5                    | 0.0   | -     |
| 620-6                    | 0.8   | -     |
| 620-7                    | 1.7   | -     |
| 620-8                    | 11.2  | -     |
| 611-1                    | -     | 21.1  |
| 611-2                    | 19.1  | -     |
| 530-1                    | -     | 56.7  |
| 530-2                    | 7.5   | -     |
| 440-1                    | -     | 118.2 |
| 440-2                    | -     | 136.1 |
| 440-3                    | -     | 168.4 |
| 440-4                    | 47.0  | -     |
| 332                      | -     | 253.9 |
| 350                      | -     | 441.9 |
| <b>The nonamer (n=9)</b> |       |       |
| 630-1                    | -     | 0.0   |
| 630-2                    | -     | 3.5   |
| 630-3                    | 0.0   | -     |
| 630-4                    | 1.5   | -     |
| 630-5                    | 29.7  | -     |
| 621-1                    | -     | 25.7  |
| 621-2                    | 17.1  | -     |
| 540-1                    | -     | 42.0  |
| 540-2                    | -     | 50.0  |

---

|                           |       |       |
|---------------------------|-------|-------|
| 540-3                     | 7.8   | -     |
| 441-1                     | -     | 134.2 |
| 441-2                     | -     | 184.5 |
| 360                       | -     | 443.7 |
| <b>The decamer (n=10)</b> |       |       |
| 640-1                     | -     | 0.0   |
| 640-2                     | -     | 3.0   |
| 640-3                     | 0.0   | -     |
| 640-4                     | 3.1   | -     |
| 631-1                     | -     | 14.5  |
| 631-2                     | -     | 41.2  |
| 631-3                     | 11.7  | -     |
| 631-4                     | 41.8  | -     |
| 541-1                     | -     | 48.1  |
| 541-2                     | 12.7  | -     |
| 442-1                     | -     | 144.4 |
| 442-2                     | -     | 194.9 |
| 433-1                     | -     | 177.4 |
| 433.2                     | 110.8 | -     |

**Table 2s : Temperature dependence of the relative free energies between the High spin state (HS) and the Low spin state (LS) of  $\text{Fe}^{2+}(\text{H}_2\text{O})_{n=1}$  (in kJ/mol). Calculations are performed at MP2-6-31++G(d,p) level of theory**

| Temperature (K) | 100_1 | 100_2 |
|-----------------|-------|-------|
| 1               | 437.0 | 0.00  |
| 20              | 437.3 | 0.00  |
| 40              | 437.5 | 0.00  |
| 60              | 437.8 | 0.00  |
| 80              | 438.1 | 0.00  |
| 100             | 438.4 | 0.00  |
| 120             | 438.6 | 0.00  |
| 140             | 438.9 | 0.00  |
| 160             | 439.2 | 0.00  |
| 180             | 439.5 | 0.00  |
| 200             | 439.7 | 0.00  |
| 220             | 440.0 | 0.00  |
| 240             | 440.3 | 0.00  |
| 260             | 440.6 | 0.00  |
| 280             | 440.9 | 0.00  |
| 300             | 441.2 | 0.00  |
| 320             | 441.5 | 0.00  |
| 340             | 441.8 | 0.00  |
| 360             | 442.1 | 0.00  |
| 380             | 442.4 | 0.00  |
| 400             | 442.7 | 0.00  |



**Table 3s : Temperature dependence of the relative free energies between the High spin state (HS) and the Low spin state (LS) of  $\text{Fe}^{2+}(\text{H}_2\text{O})_{n=2}$  (in kJ/mol). Calculations are performed at MP2-6-31++G(d,p) level of theory**

| Temperature (K) | 200_1 | 200_3 |
|-----------------|-------|-------|
| 1               | 443.4 | 0.00  |
| 20              | 443.5 | 0.00  |
| 40              | 443.6 | 0.00  |
| 60              | 443.8 | 0.00  |
| 80              | 444.1 | 0.00  |
| 100             | 444.5 | 0.00  |
| 120             | 444.8 | 0.00  |
| 140             | 445.2 | 0.00  |
| 160             | 445.7 | 0.00  |
| 180             | 446.1 | 0.00  |
| 200             | 446.5 | 0.00  |
| 220             | 447.0 | 0.00  |
| 240             | 447.5 | 0.00  |
| 260             | 447.9 | 0.00  |
| 280             | 448.4 | 0.00  |
| 300             | 448.9 | 0.00  |
| 320             | 449.4 | 0.00  |
| 340             | 449.9 | 0.00  |
| 360             | 450.3 | 0.00  |
| 380             | 450.8 | 0.00  |
| 400             | 451.3 | 0.00  |

**Table 4s : Temperature dependence of the relative free energies between the High spin state (HS) and the Low spin state (LS) of  $\text{Fe}^{2+}(\text{H}_2\text{O})_{n=3}$  (in kJ/mol). Calculations are performed at MP2-6-31++G(d,p) level of theory**

| Temperature (K) | 300_1 | 300_3 |
|-----------------|-------|-------|
| 1               | 368.3 | 0.00  |
| 20              | 368.6 | 0.00  |
| 40              | 369.0 | 0.00  |
| 60              | 369.5 | 0.00  |
| 80              | 370.1 | 0.00  |
| 100             | 370.7 | 0.00  |
| 120             | 371.4 | 0.00  |
| 140             | 372.1 | 0.00  |
| 160             | 372.7 | 0.00  |
| 180             | 373.4 | 0.00  |
| 200             | 374.1 | 0.00  |
| 220             | 374.8 | 0.00  |
| 240             | 375.5 | 0.00  |
| 260             | 376.2 | 0.00  |
| 280             | 376.9 | 0.00  |
| 300             | 377.7 | 0.00  |
| 320             | 378.4 | 0.00  |
| 340             | 379.1 | 0.00  |
| 360             | 379.8 | 0.00  |
| 380             | 380.6 | 0.00  |
| 400             | 381.3 | 0.00  |

**Table 5s : Temperature dependence of the relative free energies between the High spin state (HS) and the Low spin state (LS) of  $\text{Fe}^{2+}(\text{H}_2\text{O})_{n=4}$  (in kJ/mol). Calculations are performed at MP2-6-31++G(d,p) level of theory**

| Temperature (K) | <b>400-1</b> | <b>400-3</b> |
|-----------------|--------------|--------------|
| 1               | 335.7        | 0.00         |
| 20              | 336.0        | 0.00         |
| 40              | 336.4        | 0.00         |
| 60              | 336.9        | 0.00         |
| 80              | 337.6        | 0.00         |
| 100             | 338.3        | 0.00         |
| 120             | 339.1        | 0.00         |
| 140             | 340.0        | 0.00         |
| 160             | 340.8        | 0.00         |
| 180             | 341.7        | 0.00         |
| 200             | 342.6        | 0.00         |
| 220             | 343.5        | 0.00         |
| 240             | 344.4        | 0.00         |
| 260             | 345.4        | 0.00         |
| 280             | 346.3        | 0.00         |
| 300             | 347.2        | 0.00         |
| 320             | 348.2        | 0.00         |
| 340             | 349.1        | 0.00         |
| 360             | 350.1        | 0.00         |
| 380             | 351.1        | 0.00         |
| 400             | 352.0        | 0.00         |

**Table 6s : Temperature dependence of the relative free energies between the High spin state (HS) and the Low spin state (LS) of  $\text{Fe}^{2+}(\text{H}_2\text{O})_{n=5}$  (in kJ/mol). Calculations are performed at MP2-6-31++G(d,p) level of theory**

| Temperature (K) | <b>500-1</b> | <b>500-3</b> |
|-----------------|--------------|--------------|
| 1               | 279.9        | 0.00         |
| 20              | 280.2        | 0.00         |
| 40              | 280.4        | 0.00         |
| 60              | 280.7        | 0.00         |
| 80              | 281.1        | 0.00         |
| 100             | 281.4        | 0.00         |
| 120             | 281.8        | 0.00         |
| 140             | 282.3        | 0.00         |
| 160             | 282.7        | 0.00         |
| 180             | 283.2        | 0.00         |
| 200             | 283.7        | 0.00         |
| 220             | 284.2        | 0.00         |
| 240             | 284.7        | 0.00         |
| 260             | 285.3        | 0.00         |
| 280             | 285.8        | 0.00         |
| 300             | 286.3        | 0.00         |
| 320             | 286.9        | 0.00         |
| 340             | 287.5        | 0.00         |
| 360             | 288.0        | 0.00         |
| 380             | 288.6        | 0.00         |
| 400             | 289.2        | 0.00         |

**Table 7s : Temperature dependence of the relative free energies between the High spin state (HS) and the Low spin state (LS) of  $\text{Fe}^{2+}(\text{H}_2\text{O})_{n=6}$  (in kJ/mol). Calculations are performed at MP2-6-31++G(d,p) level of theory**

| Temperature (K) | <b>600-1</b> | <b>600-2</b> |
|-----------------|--------------|--------------|
| 1               | 240.0        | 0.00         |
| 20              | 240.3        | 0.00         |
| 40              | 240.7        | 0.00         |
| 60              | 241.3        | 0.00         |
| 80              | 242.0        | 0.00         |
| 100             | 242.9        | 0.00         |
| 120             | 244.0        | 0.00         |
| 140             | 245.1        | 0.00         |
| 160             | 246.2        | 0.00         |
| 180             | 247.5        | 0.00         |
| 200             | 248.8        | 0.00         |
| 220             | 250.1        | 0.00         |
| 240             | 251.4        | 0.00         |
| 260             | 252.8        | 0.00         |
| 280             | 254.3        | 0.00         |
| 300             | 255.7        | 0.00         |
| 320             | 257.1        | 0.00         |
| 340             | 258.6        | 0.00         |
| 360             | 260.1        | 0.00         |
| 380             | 261.6        | 0.00         |
| 400             | 263.1        | 0.00         |

**Table 8s : Temperature dependence of the relative free energies between the High spin state (HS) and the Low spin state (LS) of  $\text{Fe}^{2+}(\text{H}_2\text{O})_{n=7}$  (in kJ/mol). Calculations are performed at MP2-6-31++G(d,p) level of theory**

| Temperature (K) | <b>610-1</b> | <b>610-2</b> | <b>610-3</b> |
|-----------------|--------------|--------------|--------------|
| 1               | 240.8        | 0.0          | 6.5          |
| 20              | 241.1        | 0.0          | 6.4          |
| 40              | 241.4        | 0.0          | 6.1          |
| 60              | 241.9        | 0.0          | 5.6          |
| 80              | 242.5        | 0.0          | 5.0          |
| 100             | 243.3        | 0.0          | 4.3          |
| 120             | 244.1        | 0.0          | 3.6          |
| 140             | 245.1        | 0.0          | 2.9          |
| 160             | 246.1        | 0.0          | 2.1          |
| 180             | 247.1        | 0.0          | 1.3          |
| 200             | 248.2        | 0.0          | 0.4          |
| 220             | 249.8        | 0.4          | 0.0          |
| 240             | 251.9        | 1.3          | 0.0          |
| 260             | 254.0        | 2.2          | 0.0          |
| 280             | 256.1        | 3.1          | 0.0          |
| 300             | 258.3        | 4.0          | 0.0          |
| 320             | 260.5        | 4.9          | 0.0          |
| 340             | 262.7        | 5.8          | 0.0          |
| 360             | 264.9        | 6.8          | 0.0          |
| 380             | 267.2        | 7.7          | 0.0          |
| 400             | 269.4        | 8.6          | 0.0          |

**Table 9s : Temperature dependence of the relative free energies between the High spin state (HS) and the Low spin state (LS) of  $\text{Fe}^{2+}(\text{H}_2\text{O})_{n=8}$  (in kJ/mol). Calculations are performed at MP2-6-31++G(d,p) level of theory**

| Temperature (K) | <b>620-1</b> | <b>620-2</b> | <b>620-5</b> |
|-----------------|--------------|--------------|--------------|
| 1               | 237.5        | 238.0        | 0.0          |
| 20              | 237.7        | 238.3        | 0.0          |
| 40              | 238.2        | 238.7        | 0.0          |
| 60              | 238.8        | 239.2        | 0.0          |
| 80              | 239.6        | 240.0        | 0.0          |
| 100             | 240.6        | 240.9        | 0.0          |
| 120             | 241.7        | 241.9        | 0.0          |
| 140             | 242.9        | 242.9        | 0.0          |
| 160             | 244.2        | 244.1        | 0.0          |
| 180             | 245.6        | 245.3        | 0.0          |
| 200             | 247.1        | 246.6        | 0.0          |
| 220             | 248.6        | 247.9        | 0.0          |
| 240             | 250.1        | 249.3        | 0.0          |
| 260             | 251.7        | 250.7        | 0.0          |
| 280             | 253.4        | 252.1        | 0.0          |
| 300             | 255.0        | 253.5        | 0.0          |
| 320             | 256.7        | 255.0        | 0.0          |
| 340             | 258.4        | 256.5        | 0.0          |
| 360             | 260.1        | 258.0        | 0.0          |
| 380             | 261.8        | 259.5        | 0.0          |
| 400             | 263.6        | 261.0        | 0.0          |

**Table 10s : Temperature dependence of the relative free energies between the High spin state (HS) and the Low spin state (LS) of  $\text{Fe}^{2+}(\text{H}_2\text{O})_{n=9}$  (in kJ/mol). Calculations are performed at MP2-6-31++G(d,p) level of theory**

| Temperature (K) | <b>630-1</b> | <b>630-3</b> |
|-----------------|--------------|--------------|
| 1               | 234.8        | 0.0          |
| 20              | 235.1        | 0.0          |
| 40              | 235.6        | 0.0          |
| 60              | 236.3        | 0.0          |
| 80              | 237.2        | 0.0          |
| 100             | 238.2        | 0.0          |
| 120             | 239.2        | 0.0          |
| 140             | 240.4        | 0.0          |
| 160             | 241.7        | 0.0          |
| 180             | 243.0        | 0.0          |
| 200             | 244.3        | 0.0          |
| 220             | 245.7        | 0.0          |
| 240             | 247.2        | 0.0          |
| 260             | 248.6        | 0.0          |
| 280             | 250.1        | 0.0          |
| 300             | 251.6        | 0.0          |
| 320             | 253.1        | 0.0          |
| 340             | 254.7        | 0.0          |
| 360             | 256.2        | 0.0          |
| 380             | 257.8        | 0.0          |
| 400             | 259.4        | 0.0          |



**Table 11s : Temperature dependence of the relative free energies between the High spin state (HS) and the Low spin state (LS) of  $\text{Fe}^{2+}(\text{H}_2\text{O})_{n=10}$  (in kJ/mol). Calculations are performed at MP2-6-31++G(d,p) level of theory**

| Temperature (K) | <b>640-1</b> | <b>640-2</b> | <b>640-3</b> | <b>640-4</b> |
|-----------------|--------------|--------------|--------------|--------------|
| 1               | 231.2        | 234.1        | 0.0          | 3.1          |
| 20              | 231.5        | 234.4        | 0.0          | 3.0          |
| 40              | 231.9        | 234.8        | 0.0          | 2.8          |
| 60              | 232.5        | 235.4        | 0.0          | 2.6          |
| 80              | 233.3        | 236.1        | 0.0          | 2.3          |
| 100             | 234.3        | 236.9        | 0.0          | 2.1          |
| 120             | 235.5        | 237.9        | 0.0          | 1.8          |
| 140             | 236.7        | 239.0        | 0.0          | 1.6          |
| 160             | 238.1        | 240.1        | 0.0          | 1.3          |
| 180             | 239.5        | 241.3        | 0.0          | 1.1          |
| 200             | 241.0        | 242.6        | 0.0          | 0.8          |
| 220             | 242.5        | 243.9        | 0.0          | 0.6          |
| 240             | 244.2        | 245.3        | 0.0          | 0.3          |
| 260             | 245.8        | 246.7        | 0.0          | 0.1          |
| 280             | 247.7        | 248.3        | 0.2          | 0.0          |
| 300             | 249.6        | 250.0        | 0.4          | 0.0          |
| 320             | 251.6        | 251.7        | 0.7          | 0.0          |
| 340             | 253.7        | 253.5        | 0.9          | 0.0          |
| 360             | 255.7        | 255.3        | 1.1          | 0.0          |
| 380             | 257.8        | 257.0        | 1.4          | 0.0          |
| 400             | 259.8        | 258.8        | 1.6          | 0.0          |
