# Supplementary material for: Structures and relative stability of hydrated ferrous ion clusters and temperature effects
Source: Royal Society of Chemistry journal article supplement (doi:10.1039/d1nj01849c), 2021-01-01
Supplement: d1nj01849c2.pdf [file d1nj01849c2.pdf]

### **List of cartesian coordinates of all isomers proposed in this work**

|                                                                                                                                                                     |    |
|---------------------------------------------------------------------------------------------------------------------------------------------------------------------|----|
| Cartesian coordinates of all the proposed isomers of $[\text{Fe}^{2+}(\text{H}_2\text{O})_{n=1-10}]$ at MP2/6-31++G(d,p)level of theory at quintet spin-state ..... | 2  |
| Cartesian coordinates of all the proposed isomers of $[\text{Fe}^{2+}(\text{H}_2\text{O})_{n=1-10}]$ at MP2/6-31++G(d,p)level of theory at singlet spin-state.....  | 23 |

**Cartesian coordinates of all the proposed isomers of  
[Fe<sup>2+</sup>(H<sub>2</sub>O)<sub>n=1-10</sub>] at MP2/6-31++G(d,p) level of theory at  
quintet spin-state**

Cartesian coordinates of the monomer : [Fe(H<sub>2</sub>O)<sub>1</sub>]<sup>2+</sup>

Cartesian coordinates of : 100-2

-----  
Atomic number (AN) and Cartesian coordinates

| AN | X         | Y         | Z        |
|----|-----------|-----------|----------|
| 8  | 0.000000  | -1.373576 | 0.000000 |
| 1  | -0.787032 | -1.960488 | 0.000000 |
| 1  | 0.787032  | -1.960488 | 0.000000 |
| 26 | 0.000000  | 0.573446  | 0.000000 |

-----

Cartesian coordinates of the dimer : [Fe(H<sub>2</sub>O)<sub>2</sub>]<sup>2+</sup>

Cartesian coordinates of : 200-3

-----  
Atomic number (AN) and Cartesian coordinates

| AN | X         | Y         | Z         |
|----|-----------|-----------|-----------|
| 8  | 1.960893  | -0.000001 | 0.000000  |
| 1  | 2.546440  | 0.553835  | -0.556694 |
| 26 | 0.000001  | 0.000001  | 0.000000  |
| 8  | -1.960895 | -0.000001 | 0.000000  |
| 1  | -2.546441 | -0.556703 | -0.553830 |
| 1  | 2.546438  | -0.553841 | 0.556694  |
| 1  | -2.546442 | 0.556698  | 0.553832  |

-----

Cartesian coordinates of : 200-4

-----  
Atomic number (AN) and Cartesian coordinates

| AN | X         | Y         | Z         |
|----|-----------|-----------|-----------|
| 8  | 1.959993  | 0.000000  | 0.000000  |
| 1  | 2.545518  | -0.783898 | 0.000003  |
| 26 | 0.000000  | 0.000000  | -0.000001 |
| 8  | -1.959992 | 0.000000  | 0.000001  |
| 1  | -2.545517 | -0.783898 | 0.000000  |
| 1  | 2.545520  | 0.783896  | 0.000003  |
| 1  | -2.545519 | 0.783896  | 0.000000  |

-----

Cartesian coordinates of the trimer :  $[\text{Fe}(\text{H}_2\text{O})_3]^{2+}$

Cartesian coordinates of : 300-3

-----  
Atomic number (AN) and Cartesian coordinates

| AN | X         | Y         | Z         |
|----|-----------|-----------|-----------|
| 8  | 1.017704  | -1.731828 | 0.000004  |
| 26 | -0.012006 | -0.000023 | -0.000003 |
| 1  | 1.337077  | -2.222115 | -0.779915 |
| 1  | 1.337074  | -2.222122 | 0.779919  |
| 8  | -2.010103 | -0.002862 | 0.000001  |
| 1  | -2.591933 | -0.786310 | -0.000003 |
| 1  | -2.594172 | 0.778918  | 0.000017  |
| 8  | 1.012736  | 1.734734  | 0.000003  |
| 1  | 1.330707  | 2.225925  | -0.779919 |
| 1  | 1.330704  | 2.225942  | 0.779916  |

-----

Cartesian coordinates of : 210-2

-----  
Atomic number (AN) and Cartesian coordinates

| AN | X         | Y         | Z         |
|----|-----------|-----------|-----------|
| 8  | 0.174709  | 1.428598  | -0.000044 |
| 1  | 0.083279  | 2.398592  | 0.000245  |
| 26 | -1.187979 | 0.000000  | 0.000001  |
| 8  | 0.174709  | -1.428596 | 0.000041  |
| 1  | 0.083280  | -2.398590 | -0.000244 |
| 1  | 1.139829  | 1.180748  | -0.000173 |
| 1  | 1.139828  | -1.180746 | 0.000157  |
| 8  | 2.445379  | -0.000002 | 0.000002  |
| 1  | 3.041424  | 0.000125  | 0.770862  |
| 1  | 3.041425  | -0.000118 | -0.770858 |

-----

Cartesian coordinates of the tetramer :  $[\text{Fe}(\text{H}_2\text{O})_4]^{2+}$

Cartesian coordinates of : 400-3

-----  
Atomic number (AN) and Cartesian coordinates

| AN | X         | Y         | Z         |
|----|-----------|-----------|-----------|
| 26 | -0.000038 | -0.000019 | -0.000016 |
| 8  | -1.262272 | 1.188785  | -1.094328 |
| 1  | -2.035038 | 1.671873  | -0.753788 |
| 1  | -1.164580 | 1.455896  | -2.024233 |
| 8  | 1.262726  | -1.188136 | -1.094569 |
| 1  | 1.165342  | -1.454802 | -2.024631 |
| 1  | 2.035374  | -1.671375 | -0.753994 |
| 8  | -1.262192 | -1.189217 | 1.093999  |
| 1  | -1.164593 | -1.456396 | 2.023891  |

|   |           |           |          |
|---|-----------|-----------|----------|
| 1 | -2.034714 | -1.672530 | 0.753235 |
| 8 | 1.261835  | 1.188615  | 1.094948 |
| 1 | 1.164041  | 1.455281  | 2.024966 |
| 1 | 2.034378  | 1.672178  | 0.754590 |

-----

Cartesian coordinates of : 400-4

-----

Atomic number (AN) and Cartesian coordinates

| AN | X         | Y         | Z         |
|----|-----------|-----------|-----------|
| 8  | -2.110079 | -0.000107 | 0.000045  |
| 1  | -2.695892 | -0.000127 | 0.776396  |
| 26 | 0.000004  | 0.000000  | 0.000003  |
| 8  | 2.110092  | 0.000090  | 0.000045  |
| 1  | 2.695955  | 0.000118  | -0.776269 |
| 8  | -0.000116 | 2.043379  | -0.000047 |
| 1  | 0.781857  | 2.621371  | -0.000083 |
| 1  | -2.695943 | -0.000160 | -0.776269 |
| 1  | 2.695905  | 0.000113  | 0.776396  |
| 1  | -0.782162 | 2.621273  | -0.000074 |
| 8  | 0.000094  | -2.043359 | -0.000047 |
| 1  | 0.782127  | -2.621271 | -0.000067 |
| 1  | -0.781891 | -2.621336 | -0.000079 |

-----

Cartesian coordinates of : 310-5

-----

Atomic number (AN) and Cartesian coordinates

| AN | X         | Y         | Z         |
|----|-----------|-----------|-----------|
| 1  | -1.549808 | 1.311165  | 0.030079  |
| 1  | -0.461926 | 2.490027  | 0.043821  |
| 1  | -0.627636 | -2.353625 | 0.045010  |
| 1  | -1.632400 | -1.103145 | 0.030715  |
| 1  | 3.324788  | -0.064166 | -0.686879 |
| 1  | 3.303854  | -0.063095 | 0.879063  |
| 26 | 0.735421  | 0.024395  | 0.061558  |
| 1  | -3.496111 | 0.168805  | -0.765430 |
| 1  | -3.516711 | 0.169912  | 0.774920  |
| 8  | -2.911676 | 0.149043  | 0.012713  |
| 8  | -0.581236 | 1.524987  | 0.042889  |
| 8  | -0.680703 | -1.382688 | 0.043638  |
| 8  | 2.733121  | -0.043784 | 0.088309  |

-----

Cartesian coordinates of the pentamer :  $[\text{Fe}(\text{H}_2\text{O})_5]^{2+}$

Cartesian coordinates of : 500-3

-----

Atomic number (AN) and Cartesian coordinates

---

| AN | X         | Y         | Z         |
|----|-----------|-----------|-----------|
| 8  | 2.133563  | 0.136385  | -0.177948 |
| 1  | 2.711780  | 0.220663  | -0.953385 |
| 26 | 0.000005  | -0.000006 | -0.104725 |
| 8  | -2.133557 | -0.136310 | -0.177956 |
| 1  | -2.723901 | -0.087426 | 0.591057  |
| 8  | -0.155545 | 1.972823  | -0.728309 |
| 1  | -0.980076 | 2.466048  | -0.867504 |
| 1  | 2.723907  | 0.087516  | 0.591066  |
| 1  | -2.711777 | -0.220600 | -0.953390 |
| 1  | 0.574395  | 2.584147  | -0.917408 |
| 8  | -0.000002 | -0.000089 | 2.034936  |
| 1  | -0.316006 | -0.707505 | 2.619541  |
| 1  | 0.315977  | 0.707295  | 2.619591  |
| 8  | 0.155534  | -1.972789 | -0.728422 |
| 1  | -0.574423 | -2.584094 | -0.917523 |
| 1  | 0.980053  | -2.466041 | -0.867596 |

---

Cartesian coordinates of : 410-3

---

Atomic number (AN) and Cartesian coordinates

| AN | X         | Y         | Z         |
|----|-----------|-----------|-----------|
| 1  | -1.752266 | 0.283396  | 1.202511  |
| 1  | -0.720598 | 0.569466  | 2.381573  |
| 1  | -0.720583 | -0.569464 | -2.381573 |
| 1  | -1.752259 | -0.283413 | -1.202513 |
| 1  | 2.570343  | 1.797526  | -0.660274 |
| 1  | 1.347262  | 2.623482  | -0.163846 |
| 26 | 0.594924  | -0.000002 | 0.000003  |
| 1  | 1.347341  | -2.623465 | 0.163779  |
| 1  | 2.570357  | -1.797491 | 0.660336  |
| 1  | -3.707518 | -0.748561 | 0.173046  |
| 1  | -3.707523 | 0.748534  | -0.173050 |
| 8  | -0.798614 | 0.364390  | 1.436818  |
| 8  | -3.112001 | -0.000011 | -0.000001 |
| 8  | -0.798605 | -0.364398 | -1.436816 |
| 8  | 1.670719  | -1.717046 | 0.301337  |
| 8  | 1.670679  | 1.717068  | -0.301346 |

---

Cartesian coordinates of : 320-4

---

Atomic number (AN) and Cartesian coordinates

| AN | X         | Y         | Z         |
|----|-----------|-----------|-----------|
| 8  | -1.941742 | -1.075197 | 0.195180  |
| 1  | -2.482867 | -0.244020 | 0.270852  |
| 26 | -0.000010 | -0.846055 | -0.142384 |
| 8  | 1.941698  | -1.075206 | 0.195385  |
| 1  | 2.525979  | -1.849976 | 0.158287  |
| 8  | 0.000008  | 1.144599  | -0.361891 |

|   |           |           |           |
|---|-----------|-----------|-----------|
| 1 | 0.811121  | 1.688011  | -0.294121 |
| 1 | -2.526034 | -1.849956 | 0.158004  |
| 1 | 2.482841  | -0.244028 | 0.270954  |
| 1 | -0.811090 | 1.688031  | -0.294102 |
| 8 | 2.768194  | 1.469965  | 0.148931  |
| 1 | 3.389853  | 1.751894  | -0.543626 |
| 1 | 3.084502  | 1.916011  | 0.952809  |
| 8 | -2.768135 | 1.470017  | 0.149063  |
| 1 | -3.389826 | 1.752053  | -0.543422 |
| 1 | -3.084379 | 1.915981  | 0.953011  |

-----

Cartesian coordinates of the hexamer :  $[\text{Fe}(\text{H}_2\text{O})_6]^{2+}$

Cartesian coordinates of : 600-2

-----

Atomic number (AN) and Cartesian coordinates

| AN | X         | Y         | Z         |
|----|-----------|-----------|-----------|
| 1  | 1.121413  | 2.409604  | -1.021067 |
| 1  | 0.065133  | 1.953623  | -2.063932 |
| 1  | -1.526103 | 2.175859  | 1.021257  |
| 1  | -1.659353 | 1.032997  | 2.064004  |
| 1  | -0.065134 | -1.953610 | 2.063937  |
| 1  | -1.121406 | -2.409606 | 1.021072  |
| 1  | 1.724255  | 0.920334  | 2.064121  |
| 1  | 2.647389  | 0.233588  | 1.021329  |
| 26 | 0.000001  | -0.000003 | -0.000003 |
| 1  | 1.526100  | -2.175869 | -1.021264 |
| 1  | 1.659355  | -1.033007 | -2.064009 |
| 1  | -2.647385 | -0.233608 | -1.021320 |
| 1  | -1.724255 | -0.920318 | -2.064139 |
| 8  | 1.234530  | -1.274315 | -1.226691 |
| 8  | 1.720833  | 0.431844  | 1.226760  |
| 8  | -0.486457 | -1.706318 | 1.226595  |
| 8  | -1.234520 | 1.274311  | 1.226692  |
| 8  | -1.720828 | -0.431847 | -1.226767 |
| 8  | 0.486437  | 1.706338  | -1.226579 |

-----

Cartesian coordinates of : 510-3

-----

Atomic number (AN) and Cartesian coordinates

| AN | X        | Y         | Z         |
|----|----------|-----------|-----------|
| 8  | 0.996743 | -1.756188 | -1.056580 |
| 1  | 0.501632 | -2.164319 | -1.783947 |
| 26 | 0.488387 | 0.016096  | -0.086791 |
| 8  | 1.000373 | 2.003608  | -0.423150 |
| 1  | 0.476337 | 2.648833  | -0.922856 |
| 8  | 2.301395 | -0.164502 | 1.072223  |
| 1  | 2.389096 | -0.218017 | 2.036842  |
| 1  | 1.665262 | -2.401123 | -0.777259 |

|   |           |           |           |
|---|-----------|-----------|-----------|
| 1 | 1.737403  | 2.487968  | -0.019524 |
| 1 | 3.207416  | -0.197228 | 0.725816  |
| 8 | -1.223728 | 0.257771  | -1.316014 |
| 1 | -2.126397 | 0.196606  | -0.932358 |
| 1 | -1.315373 | 0.408594  | -2.268448 |
| 8 | -0.827875 | -0.315121 | 1.480361  |
| 1 | -1.800279 | -0.272793 | 1.335164  |
| 1 | -0.677991 | -0.551698 | 2.406854  |
| 8 | -3.355869 | -0.054409 | 0.421730  |
| 1 | -3.956059 | -0.815353 | 0.358392  |
| 1 | -3.927413 | 0.690774  | 0.669331  |

-----

Cartesian coordinates of : 420-5

-----

Atomic number (AN) and Cartesian coordinates

| AN | X         | Y         | Z         |
|----|-----------|-----------|-----------|
| 8  | 1.373262  | 1.018709  | 1.096490  |
| 1  | 1.288065  | 1.675924  | 1.803927  |
| 26 | -0.000002 | 0.000019  | -0.000001 |
| 8  | -1.373262 | 1.096537  | -1.018665 |
| 1  | -2.327141 | 0.918883  | -0.853650 |
| 8  | 1.373231  | -1.018702 | -1.096503 |
| 1  | 1.288023  | -1.675934 | -1.803922 |
| 1  | 2.327141  | 0.853663  | 0.918868  |
| 1  | -1.288066 | 1.803963  | -1.675891 |
| 1  | 2.327112  | -0.853675 | -0.918875 |
| 8  | -1.373228 | -1.096526 | 1.018681  |
| 1  | -2.327110 | -0.918894 | 0.853661  |
| 1  | -1.288018 | -1.803965 | 1.675892  |
| 8  | 3.684483  | -0.000026 | -0.000001 |
| 1  | 4.279327  | -0.563021 | 0.523007  |
| 1  | 4.279323  | 0.562938  | -0.523048 |
| 8  | -3.684481 | -0.000028 | 0.000001  |
| 1  | -4.279323 | 0.522975  | 0.563003  |
| 1  | -4.279323 | -0.523068 | -0.562967 |

-----

Cartesian coordinates of the heptamer :  $[\text{Fe}(\text{H}_2\text{O})_7]^{2+}$

Cartesian coordinates of : 610-2

-----

Atomic number (AN) and Cartesian coordinates

| AN | X         | Y         | Z         |
|----|-----------|-----------|-----------|
| 1  | 0.073260  | -2.708969 | -0.542418 |
| 1  | -1.045442 | -2.686778 | 0.534403  |
| 1  | -2.364744 | -0.776187 | -1.913083 |
| 1  | -2.364752 | 0.775738  | -1.913254 |
| 1  | 0.073201  | 2.708882  | -0.542927 |
| 1  | -1.045537 | 2.686860  | 0.533858  |
| 1  | 1.096200  | -0.000191 | -2.380504 |

---

|    |           |           |           |
|----|-----------|-----------|-----------|
| 1  | 2.124732  | -0.000122 | -1.183292 |
| 26 | -0.375727 | 0.000006  | 0.045891  |
| 1  | 2.148738  | 0.000145  | 1.173334  |
| 1  | 1.207875  | 0.000336  | 2.428993  |
| 1  | -2.907128 | 0.000117  | 1.195929  |
| 1  | -2.005865 | 0.000180  | 2.460076  |
| 8  | 1.212007  | 0.000187  | 1.461878  |
| 8  | 1.171816  | -0.000134 | -1.415604 |
| 8  | -0.568996 | 2.131984  | -0.102424 |
| 8  | -2.037039 | -0.000170 | -1.434449 |
| 8  | -1.983462 | 0.000132  | 1.491417  |
| 8  | -0.568936 | -2.132007 | -0.101998 |
| 8  | 3.578756  | -0.000009 | -0.023335 |
| 1  | 4.172591  | -0.767749 | -0.023986 |
| 1  | 4.172605  | 0.767721  | -0.024163 |

---

Cartesian coordinates of : 520-2

---

Atomic number (AN) and Cartesian coordinates

| AN | X         | Y         | Z         |
|----|-----------|-----------|-----------|
| 8  | -1.187148 | 0.849453  | 1.286725  |
| 1  | -0.943020 | 1.317567  | 2.097676  |
| 26 | -0.000002 | -0.255910 | 0.000006  |
| 8  | 1.187141  | 0.849468  | -1.286707 |
| 1  | 0.943009  | 1.317599  | -2.097647 |
| 8  | 1.695734  | -0.317311 | 1.291018  |
| 1  | 2.562617  | 0.034535  | 0.995847  |
| 1  | -2.137821 | 1.019040  | 1.103271  |
| 1  | 2.137812  | 1.019057  | -1.103249 |
| 1  | 1.754479  | -0.490055 | 2.241812  |
| 8  | 0.000001  | -2.337920 | -0.000030 |
| 1  | 0.690604  | -2.910797 | 0.366706  |
| 1  | -0.690601 | -2.910779 | -0.366797 |
| 8  | -1.695717 | -0.317248 | -1.291032 |
| 1  | -1.754447 | -0.489976 | -2.241830 |
| 1  | -2.562608 | 0.034583  | -0.995863 |
| 8  | 3.713298  | 0.912476  | -0.187025 |
| 1  | 4.441530  | 0.409833  | -0.586425 |
| 1  | 4.120493  | 1.741185  | 0.112920  |
| 8  | -3.713302 | 0.912452  | 0.187035  |
| 1  | -4.441506 | 0.409759  | 0.586424  |
| 1  | -4.120537 | 1.741156  | -0.112867 |

---

Cartesian coordinates of : 610-3

---

Atomic number (AN) and Cartesian coordinates

| AN | X        | Y         | Z         |
|----|----------|-----------|-----------|
| 1  | 2.187491 | 0.000813  | -2.163839 |
| 1  | 3.112568 | 0.000563  | -0.908386 |
| 1  | 1.035401 | -2.777553 | -0.529503 |



---

|    |           |           |           |
|----|-----------|-----------|-----------|
| 1  | -0.075738 | -2.797764 | 0.551016  |
| 1  | -2.275316 | -0.000346 | 0.755365  |
| 1  | -1.409045 | -0.000866 | 2.088789  |
| 1  | -1.123525 | -0.773346 | -2.194455 |
| 1  | -1.124020 | 0.774849  | -2.193595 |
| 26 | 0.417581  | -0.000009 | 0.025457  |
| 1  | -0.075616 | 2.797374  | 0.553092  |
| 1  | 1.035239  | 2.777897  | -0.527730 |
| 1  | 2.026015  | -0.778048 | 2.226930  |
| 1  | 2.025729  | 0.776391  | 2.227738  |
| 8  | 0.471577  | 2.206599  | 0.014821  |
| 8  | -0.669182 | 0.000694  | -1.828851 |
| 8  | -1.345775 | -0.000520 | 1.123263  |
| 8  | 0.471571  | -2.206625 | 0.013263  |
| 8  | 1.688443  | -0.000646 | 1.757074  |
| 8  | 2.186799  | 0.000479  | -1.194578 |
| 8  | -3.744861 | 0.000048  | 0.030814  |
| 1  | -4.332453 | 0.769072  | 0.063553  |
| 1  | -4.332424 | -0.769036 | 0.062679  |

---

Cartesian coordinates of : 430-4

---

Atomic number (AN) and Cartesian coordinates

| AN | X         | Y         | Z         |
|----|-----------|-----------|-----------|
| 8  | -1.497140 | -1.805748 | -0.303012 |
| 1  | -1.469605 | -2.681431 | -0.716894 |
| 26 | 0.000003  | -0.436034 | -0.000001 |
| 8  | 1.417789  | 1.017453  | -0.169158 |
| 1  | 2.383004  | 0.857897  | -0.183600 |
| 8  | -1.417797 | 1.017445  | 0.169144  |
| 1  | -1.209744 | 1.976360  | 0.167867  |
| 1  | -2.439939 | -1.522001 | -0.222198 |
| 1  | 1.209729  | 1.976367  | -0.167869 |
| 1  | -2.383011 | 0.857884  | 0.183582  |
| 8  | 1.497149  | -1.805740 | 0.303034  |
| 1  | 2.439947  | -1.521992 | 0.222208  |
| 1  | 1.469618  | -2.681418 | 0.716925  |
| 8  | -3.812851 | -0.415323 | 0.063883  |
| 1  | -4.355553 | -0.568069 | 0.854621  |
| 1  | -4.452955 | -0.300409 | -0.657283 |
| 8  | 3.812849  | -0.415317 | -0.063902 |
| 1  | 4.355543  | -0.568071 | -0.854643 |
| 1  | 4.452960  | -0.300395 | 0.657257  |
| 8  | -0.000006 | 3.388410  | 0.000011  |
| 1  | -0.103109 | 3.981375  | -0.761785 |
| 1  | 0.103097  | 3.981361  | 0.761818  |

---

Cartesian coordinates of : 430-5

---

Atomic number (AN) and Cartesian coordinates

| AN | X | Y | Z |
|----|---|---|---|
|----|---|---|---|

---

|    |           |           |           |
|----|-----------|-----------|-----------|
| 1  | -1.091713 | -1.648562 | -2.022183 |
| 1  | -0.173127 | -2.263047 | -0.873018 |
| 1  | 1.224302  | -1.542240 | 1.054183  |
| 1  | 2.067165  | -0.186773 | 1.136477  |
| 26 | -0.138148 | 0.341118  | -0.333453 |
| 1  | -1.670435 | 2.229524  | 0.761196  |
| 1  | -2.653989 | 0.984926  | 0.516277  |
| 1  | -4.464533 | 0.138837  | 1.478594  |
| 1  | -4.805450 | 0.690681  | 0.072459  |
| 1  | 0.144334  | -3.881549 | 0.875643  |
| 1  | 1.381819  | -3.871575 | -0.033614 |
| 1  | 1.314754  | 2.295430  | -1.687917 |
| 1  | 2.183805  | 1.643015  | -0.524092 |
| 1  | 3.630777  | 1.811165  | 1.403456  |
| 1  | 4.268673  | 0.860985  | 0.379474  |
| 8  | -0.530706 | -1.430220 | -1.263653 |
| 8  | 0.676408  | -3.299566 | 0.309394  |
| 8  | -1.702227 | 1.327732  | 0.408156  |
| 8  | -4.071453 | 0.401675  | 0.633852  |
| 8  | 1.189676  | -0.572618 | 0.946852  |
| 8  | 1.308442  | 1.637319  | -0.977307 |
| 8  | 3.409294  | 1.169442  | 0.709311  |

---

Cartesian coordinates of : 340-2

---

Atomic number (AN) and Cartesian coordinates

| AN | X         | Y         | Z         |
|----|-----------|-----------|-----------|
| 1  | 2.465700  | -0.347218 | 0.328831  |
| 1  | 2.478837  | 1.280857  | 0.115682  |
| 1  | -0.817032 | -2.369182 | -0.279091 |
| 1  | 0.817036  | -2.369181 | -0.279092 |
| 1  | -2.465696 | -0.347222 | 0.328825  |
| 1  | -2.478839 | 1.280853  | 0.115678  |
| 26 | 0.000002  | 0.143166  | -0.155853 |
| 1  | 2.949135  | -2.758218 | 0.976891  |
| 1  | 3.278611  | -2.587253 | -0.510773 |
| 8  | 2.664787  | -2.285219 | 0.178239  |
| 8  | 1.908888  | 0.445184  | 0.185676  |
| 8  | 0.000002  | -1.843788 | -0.412807 |
| 8  | -1.908886 | 0.445182  | 0.185669  |
| 8  | -3.233026 | 2.623858  | 0.012511  |
| 1  | -3.762861 | 2.910875  | -0.744633 |
| 1  | -3.563704 | 3.113536  | 0.779034  |
| 8  | -2.664780 | -2.285224 | 0.178241  |
| 1  | -3.278604 | -2.587262 | -0.510770 |
| 1  | -2.949126 | -2.758221 | 0.976895  |
| 8  | 3.233012  | 2.623869  | 0.012509  |
| 1  | 3.563688  | 3.113552  | 0.779030  |
| 1  | 3.762846  | 2.910886  | -0.744636 |

---

Cartesian coordinates of the octamer :  $[\text{Fe}(\text{H}_2\text{O})_8]^{2+}$

Cartesian coordinates of : 620-5

-----  
Atomic number (AN) and Cartesian coordinates

| AN | X         | Y         | Z         |
|----|-----------|-----------|-----------|
| 1  | -2.596106 | -0.455835 | 0.000004  |
| 1  | -2.784620 | 1.115030  | -0.000036 |
| 1  | -0.776708 | 0.672590  | -2.705204 |
| 1  | 0.776676  | 0.672629  | -2.705200 |
| 1  | 2.596132  | -0.455692 | 0.000008  |
| 1  | 2.784562  | 1.115182  | -0.000024 |
| 1  | 0.800539  | -2.147944 | -0.000018 |
| 1  | -0.800415 | -2.147987 | -0.000009 |
| 26 | -0.000014 | 0.512448  | -0.000001 |
| 1  | -0.776710 | 0.672569  | 2.705201  |
| 1  | 0.776675  | 0.672615  | 2.705202  |
| 1  | -0.000086 | 3.307946  | -0.777002 |
| 1  | -0.000109 | 3.307937  | 0.777045  |
| 1  | -3.156452 | -2.738720 | 0.766804  |
| 1  | -3.156459 | -2.738718 | -0.766788 |
| 1  | 3.156600  | -2.738551 | 0.766802  |
| 1  | 3.156617  | -2.738543 | -0.766790 |
| 8  | -0.000086 | 2.730894  | 0.000018  |
| 8  | -2.127226 | 0.405246  | -0.000005 |
| 8  | -0.000020 | 0.795654  | -2.139448 |
| 8  | 0.000047  | -1.591209 | -0.000019 |
| 8  | -2.740413 | -2.314501 | 0.000007  |
| 8  | -0.000021 | 0.795634  | 2.139448  |
| 8  | 2.740543  | -2.314351 | 0.000004  |
| 8  | 2.127205  | 0.405363  | -0.000001 |

-----

Cartesian coordinates of : 620-6

-----  
Atomic number (AN) and Cartesian coordinates

| AN | X         | Y         | Z         |
|----|-----------|-----------|-----------|
| 1  | -0.533858 | 2.704035  | -0.571432 |
| 1  | 0.533849  | 2.704044  | 0.571400  |
| 1  | 1.568234  | -0.051318 | -2.399263 |
| 1  | 2.521384  | -0.151703 | -1.163325 |
| 1  | 0.533855  | -2.704043 | -0.571402 |
| 1  | -0.533853 | -2.704037 | 0.571428  |
| 1  | -1.568234 | 0.051297  | -2.399264 |
| 1  | -2.521387 | 0.151677  | -1.163327 |
| 26 | 0.000001  | -0.000000 | 0.000000  |
| 1  | -2.521387 | -0.151679 | 1.163326  |
| 1  | -1.568235 | -0.051309 | 2.399265  |
| 1  | 2.521384  | 0.151706  | 1.163325  |
| 1  | 1.568234  | 0.051329  | 2.399264  |
| 8  | -1.587235 | -0.231616 | 1.448985  |

---

|   |           |           |           |
|---|-----------|-----------|-----------|
| 8 | -1.587234 | 0.231611  | -1.448986 |
| 8 | 0.000007  | -2.133795 | 0.000016  |
| 8 | 1.587232  | -0.231636 | -1.448985 |
| 8 | 1.587232  | 0.231640  | 1.448985  |
| 8 | 0.000001  | 2.133795  | -0.000016 |
| 8 | -3.969538 | 0.000001  | 0.000000  |
| 1 | -4.562396 | 0.763363  | 0.085388  |
| 1 | -4.562397 | -0.763359 | -0.085387 |
| 8 | 3.969534  | 0.000000  | 0.000000  |
| 1 | 4.562393  | -0.763359 | 0.085407  |
| 1 | 4.562393  | 0.763359  | -0.085407 |

---

Cartesian coordinates of : 620-7

---

Atomic number (AN) and Cartesian coordinates

| AN | X         | Y         | Z         |
|----|-----------|-----------|-----------|
| 1  | -0.795190 | 1.270483  | -2.130236 |
| 1  | -2.003335 | 1.196162  | -1.131112 |
| 1  | -2.488452 | 0.407937  | 1.037044  |
| 1  | -1.997827 | -0.632665 | 2.102511  |
| 1  | 0.757169  | -2.261422 | 2.128174  |
| 1  | 1.844050  | -2.173316 | 1.027977  |
| 1  | 1.802647  | 1.595653  | 0.814468  |
| 1  | 0.588210  | 1.695210  | 1.825502  |
| 26 | -0.019811 | -0.368762 | 0.051717  |
| 1  | 2.018025  | -0.837809 | -1.932461 |
| 1  | 2.571675  | 0.274507  | -0.972091 |
| 1  | -1.329522 | -1.971509 | -1.840075 |
| 1  | -0.595998 | -2.958689 | -0.876796 |
| 1  | -4.369037 | 1.161228  | -0.377603 |
| 1  | -3.708728 | 2.397263  | 0.251517  |
| 1  | 4.225329  | 1.585668  | 0.386481  |
| 1  | 3.562114  | 2.570180  | -0.587874 |
| 8  | -3.517806 | 1.496535  | -0.054348 |
| 8  | -0.671787 | -2.027230 | -1.131534 |
| 8  | 0.913045  | 1.245414  | 1.033579  |
| 8  | -1.151163 | 0.780864  | -1.375709 |
| 8  | -1.715544 | -0.117545 | 1.334037  |
| 8  | 0.924200  | -1.943866 | 1.228764  |
| 8  | 3.397062  | 1.754224  | -0.089792 |
| 8  | 1.876239  | -0.404781 | -1.078757 |

---

Cartesian coordinates of : 530-2

---

Atomic number (AN) and Cartesian coordinates

| AN | X         | Y         | Z         |
|----|-----------|-----------|-----------|
| 8  | -1.265131 | -0.000000 | 1.508821  |
| 1  | -0.908660 | -0.000000 | 2.408000  |
| 26 | -0.176948 | -0.000000 | -0.260832 |
| 8  | 0.294391  | 1.920344  | -0.853308 |

---

|   |           |           |           |
|---|-----------|-----------|-----------|
| 1 | -0.261856 | 2.552785  | -1.329213 |
| 8 | 1.725976  | 0.000000  | 0.765702  |
| 1 | 2.298379  | 0.790422  | 0.763023  |
| 1 | -2.243204 | -0.000000 | 1.552234  |
| 1 | 1.116311  | 2.375824  | -0.557591 |
| 1 | 2.298380  | -0.790421 | 0.763023  |
| 8 | 0.294391  | -1.920345 | -0.853307 |
| 1 | -0.261856 | -2.552785 | -1.329212 |
| 1 | 1.116312  | -2.375824 | -0.557591 |
| 8 | -2.045941 | -0.000000 | -1.268152 |
| 1 | -2.262182 | -0.000001 | -2.211315 |
| 1 | -2.886028 | -0.000000 | -0.761678 |
| 8 | 2.677355  | 2.649556  | 0.266954  |
| 1 | 3.451288  | 2.837578  | -0.287196 |
| 1 | 2.722886  | 3.300297  | 0.985208  |
| 8 | -3.947871 | -0.000000 | 0.765821  |
| 1 | -4.518746 | -0.768374 | 0.925022  |
| 1 | -4.518746 | 0.768374  | 0.925022  |
| 8 | 2.677356  | -2.649555 | 0.266954  |
| 1 | 3.451289  | -2.837577 | -0.287197 |
| 1 | 2.722888  | -3.300295 | 0.985208  |

---

Cartesian coordinates of : 620-8

---

Atomic number (AN) and Cartesian coordinates

| AN | X         | Y         | Z         |
|----|-----------|-----------|-----------|
| 1  | -1.995019 | 0.538949  | 0.838917  |
| 1  | -1.775574 | -1.019001 | 0.867944  |
| 1  | 0.536538  | 1.653359  | 2.325459  |
| 1  | 1.740883  | 2.207738  | 1.514719  |
| 1  | -1.241502 | 1.904370  | -1.016265 |
| 1  | -0.227762 | 1.752721  | -2.213379 |
| 1  | -2.850148 | 2.972214  | 0.505950  |
| 1  | -3.619267 | 2.050436  | -0.446141 |
| 26 | 0.564808  | 0.091292  | -0.035641 |
| 1  | -2.967544 | -2.872326 | -0.432964 |
| 1  | -2.057110 | -3.549262 | 0.596347  |
| 1  | 2.102922  | -1.050641 | 2.083269  |
| 1  | 1.780224  | -2.215497 | 1.099938  |
| 8  | -2.129081 | -2.757145 | 0.041017  |
| 8  | -2.762316 | 2.150915  | -0.002637 |
| 8  | -0.373656 | 1.532533  | -1.283056 |
| 8  | 1.078196  | 1.501833  | 1.536827  |
| 8  | 1.726118  | -1.256100 | 1.215296  |
| 8  | -1.318142 | -0.158452 | 0.927861  |
| 8  | 0.160026  | -1.684556 | -1.160503 |
| 1  | -0.642242 | -2.210700 | -0.960658 |
| 1  | 0.481870  | -1.947906 | -2.034139 |
| 8  | 2.392789  | 0.456733  | -1.159795 |
| 1  | 2.708383  | 1.274941  | -1.570584 |
| 1  | 3.148864  | -0.149066 | -1.151824 |

---

Cartesian coordinates of : 611-2

-----  
Atomic number (AN) and Cartesian coordinates

| AN | X         | Y         | Z         |
|----|-----------|-----------|-----------|
| 1  | 1.235349  | 2.680339  | -0.614893 |
| 1  | 2.341694  | 2.354338  | 0.424807  |
| 1  | 2.975819  | 0.036025  | -1.935797 |
| 1  | 2.483691  | -1.434764 | -1.886872 |
| 1  | -0.449104 | -2.427990 | -0.424767 |
| 1  | 0.654027  | -2.763195 | 0.615766  |
| 1  | -0.579389 | 0.383855  | -2.365477 |
| 1  | -1.531150 | 0.679817  | -1.126031 |
| 26 | 0.866435  | -0.013569 | 0.045823  |
| 1  | -0.607504 | 0.625754  | 2.412285  |
| 1  | -1.527910 | 0.751788  | 1.133993  |
| 1  | 3.292094  | -0.754043 | 1.188319  |
| 1  | 2.439063  | -0.470925 | 2.455538  |
| 8  | -0.623909 | 0.516029  | 1.452328  |
| 8  | -0.620670 | 0.409277  | -1.399723 |
| 8  | 0.380319  | -2.105198 | -0.041058 |
| 8  | 2.445559  | -0.587863 | -1.418061 |
| 8  | 2.415279  | -0.467890 | 1.487208  |
| 8  | 1.706978  | 1.950242  | -0.186174 |
| 8  | -2.838998 | 1.053627  | -0.017861 |
| 1  | -3.231001 | 1.939625  | -0.037509 |
| 1  | -3.606744 | 0.422030  | -0.007607 |
| 8  | -4.822162 | -0.744656 | -0.006021 |
| 1  | -5.352717 | -0.954750 | 0.774793  |
| 1  | -5.402689 | -0.903639 | -0.763044 |

-----

Cartesian coordinates of : 440-4

-----  
Atomic number (AN) and Cartesian coordinates

| AN | X         | Y         | Z         |
|----|-----------|-----------|-----------|
| 1  | 1.594214  | 1.784588  | -0.776048 |
| 1  | 0.575309  | 2.080238  | 0.458232  |
| 1  | -1.388497 | 1.019838  | 1.665993  |
| 1  | -2.478525 | 0.105901  | 0.937670  |
| 26 | -0.080248 | -0.342126 | -0.249397 |
| 1  | 0.454786  | -2.952281 | -0.093864 |
| 1  | 1.743303  | -2.235804 | 0.528715  |
| 1  | 3.256892  | -2.698325 | 2.115443  |
| 1  | 3.924009  | -2.696981 | 0.718545  |
| 1  | 0.083416  | 2.727878  | 2.828815  |
| 1  | -0.881004 | 3.489143  | 1.910900  |
| 1  | -1.491760 | -1.093028 | -2.548933 |
| 1  | -2.492708 | -0.770682 | -1.359086 |
| 1  | -4.426575 | -1.249718 | 0.038347  |
| 1  | -4.567918 | 0.168926  | -0.532743 |
| 8  | 0.840571  | 1.426333  | -0.220224 |
| 8  | -0.394871 | 2.653210  | 1.988095  |

---

|   |           |           |           |
|---|-----------|-----------|-----------|
| 8 | 0.843601  | -2.084874 | 0.090669  |
| 8 | 3.139110  | -2.402161 | 1.201743  |
| 8 | -1.525919 | 0.223273  | 1.116693  |
| 8 | -1.545785 | -0.840740 | -1.616068 |
| 8 | -3.906638 | -0.483126 | -0.251393 |
| 8 | 2.776983  | 2.261175  | -1.738755 |
| 1 | 3.705590  | 2.337068  | -1.479604 |
| 1 | 2.659505  | 2.853809  | -2.494134 |

---

Cartesian coordinates of the nanomer :  $[\text{Fe}(\text{H}_2\text{O})_9]^{2+}$

Cartesian coordinates of : 630-3

---

Atomic number (AN) and Cartesian coordinates

| AN | X         | Y         | Z         |
|----|-----------|-----------|-----------|
| 1  | 0.593204  | -2.779524 | 0.653431  |
| 1  | -0.854835 | -2.586536 | 0.068713  |
| 1  | -2.267082 | -0.800234 | -0.859365 |
| 1  | -2.267597 | 0.799034  | -0.859367 |
| 1  | -0.856146 | 2.586218  | 0.067998  |
| 1  | 0.591980  | 2.780156  | 0.652148  |
| 1  | 2.110193  | 0.000145  | -1.667541 |
| 1  | 0.719463  | 0.000019  | -2.423882 |
| 26 | 0.123534  | 0.000120  | 0.306638  |
| 1  | 2.468529  | 0.001349  | 1.988653  |
| 1  | 2.995025  | 0.000473  | 0.506515  |
| 1  | -0.788462 | -0.781352 | 2.855051  |
| 1  | -0.788760 | 0.782078  | 2.854760  |
| 1  | -3.260092 | -3.073801 | -0.295818 |
| 1  | -2.568083 | -3.177461 | -1.661069 |
| 1  | 4.439588  | 0.768339  | -1.421266 |
| 1  | 4.439646  | -0.767907 | -1.421041 |
| 8  | -2.522602 | -2.712250 | -0.811441 |
| 8  | -0.489433 | 0.000330  | 2.368732  |
| 8  | 1.137030  | 0.000121  | -1.552558 |
| 8  | -0.111066 | -2.131832 | 0.513351  |
| 8  | -1.725395 | -0.000425 | -0.721933 |
| 8  | -0.112035 | 2.132065  | 0.512632  |
| 8  | 3.894273  | 0.000229  | -1.190876 |
| 8  | 2.192522  | 0.000557  | 1.062312  |
| 8  | -2.524138 | 2.710923  | -0.811821 |
| 1  | -2.570020 | 3.175888  | -1.661561 |
| 1  | -3.261698 | 3.072249  | -0.296140 |

---

Cartesian coordinates of : 630-4

---

Atomic number (AN) and Cartesian coordinates

| AN | X         | Y        | Z        |
|----|-----------|----------|----------|
| 1  | -0.458680 | 0.046495 | 2.746192 |

---

---

|    |           |           |           |
|----|-----------|-----------|-----------|
| 1  | 0.629034  | -1.074937 | 2.666313  |
| 1  | 1.243767  | 2.067286  | -0.193480 |
| 1  | 2.416524  | 0.983377  | -0.185777 |
| 1  | 0.458680  | 0.046494  | -2.746192 |
| 1  | -0.629034 | -1.074937 | -2.666311 |
| 1  | -1.243767 | 2.067286  | 0.193479  |
| 1  | -2.416524 | 0.983377  | 0.185776  |
| 26 | -0.000000 | -0.385386 | 0.000000  |
| 1  | -2.545922 | -1.450089 | -0.081001 |
| 1  | -1.664008 | -2.731752 | 0.106623  |
| 1  | 2.545922  | -1.450089 | 0.081002  |
| 1  | 1.664008  | -2.731752 | -0.106621 |
| 8  | -1.633057 | -1.800152 | -0.151265 |
| 8  | -1.461946 | 1.124875  | 0.325525  |
| 8  | -0.115487 | -0.444524 | -2.141926 |
| 8  | 1.461946  | 1.124875  | -0.325526 |
| 8  | 1.633057  | -1.800152 | 0.151267  |
| 8  | 0.115487  | -0.444521 | 2.141926  |
| 8  | -3.940198 | -0.212220 | 0.001835  |
| 1  | -4.553468 | -0.255312 | 0.751942  |
| 1  | -4.512785 | -0.136123 | -0.777153 |
| 8  | 3.940198  | -0.212220 | -0.001835 |
| 1  | 4.553467  | -0.255312 | -0.751943 |
| 1  | 4.512786  | -0.136123 | 0.777152  |
| 8  | 0.000000  | 3.524714  | -0.000000 |
| 1  | 0.091893  | 4.118372  | 0.761167  |
| 1  | -0.091893 | 4.118373  | -0.761167 |

---

Cartesian coordinates of : 540-4

---

Atomic number (AN) and Cartesian coordinates

| AN | X         | Y         | Z         |
|----|-----------|-----------|-----------|
| 1  | -2.585277 | 0.798247  | -0.078864 |
| 1  | -2.585274 | -0.798233 | -0.078893 |
| 1  | 0.806262  | 2.432171  | -0.630213 |
| 1  | -0.806258 | 2.432172  | -0.630212 |
| 1  | 0.806258  | -2.432185 | -0.630194 |
| 1  | -0.806261 | -2.432183 | -0.630195 |
| 26 | 0.000000  | -0.000001 | 0.332246  |
| 1  | 2.585278  | 0.798244  | -0.078864 |
| 1  | 2.585273  | -0.798236 | -0.078893 |
| 1  | -3.114737 | 2.820805  | -1.507638 |
| 1  | -3.106955 | 3.266378  | -0.039148 |
| 1  | 3.114730  | -2.820795 | -1.507663 |
| 1  | 3.106982  | -3.266351 | -0.039167 |
| 8  | -2.098424 | 0.000003  | 0.204621  |
| 8  | -2.700247 | 2.633558  | -0.651182 |
| 8  | 0.000001  | 1.907086  | -0.462828 |
| 8  | 2.098424  | 0.000000  | 0.204621  |
| 8  | -0.000001 | -1.907102 | -0.462799 |
| 8  | 2.700254  | -2.633543 | -0.651201 |
| 8  | -2.700258 | -2.633540 | -0.651201 |
| 1  | -3.106987 | -3.266347 | -0.039168 |



|   |           |           |           |
|---|-----------|-----------|-----------|
| 1 | -3.114734 | -2.820791 | -1.507663 |
| 8 | 2.700250  | 2.633555  | -0.651183 |
| 1 | 3.114741  | 2.820801  | -1.507638 |
| 1 | 3.106959  | 3.266374  | -0.039149 |
| 8 | -0.000000 | -0.000015 | 2.421321  |
| 1 | -0.782626 | -0.000025 | 2.991901  |
| 1 | 0.782626  | -0.000026 | 2.991901  |

-----

Cartesian coordinates of : 621-2

-----

Atomic number (AN) and Cartesian coordinates

| AN | X         | Y         | Z         |
|----|-----------|-----------|-----------|
| 1  | 0.373034  | 2.657456  | -1.642287 |
| 1  | 1.391420  | 3.096230  | -0.541449 |
| 1  | 2.786806  | 0.094092  | -1.773477 |
| 1  | 2.687101  | -1.227438 | -0.932093 |
| 1  | -0.052030 | -1.826731 | 1.511167  |
| 1  | 1.224194  | -2.199523 | 0.649030  |
| 1  | -0.694211 | -0.398689 | -2.294213 |
| 1  | -1.769713 | 0.200819  | -1.305510 |
| 26 | 0.608859  | 0.464056  | 0.074586  |
| 1  | -1.184788 | 1.416127  | 2.082326  |
| 1  | -1.995772 | 0.873103  | 0.841249  |
| 1  | 3.013841  | 1.063780  | 1.315331  |
| 1  | 2.005317  | 1.524502  | 2.397853  |
| 8  | -1.101075 | 0.919069  | 1.257642  |
| 8  | -0.806077 | 0.149253  | -1.505805 |
| 8  | 0.600135  | -1.482390 | 0.886051  |
| 8  | 2.406765  | -0.291788 | -0.971678 |
| 8  | 2.081589  | 1.281982  | 1.463724  |
| 8  | 0.933224  | 2.332725  | -0.922301 |
| 8  | -3.240129 | 0.568345  | -0.360813 |
| 1  | -3.786088 | 1.309102  | -0.663707 |
| 1  | -3.877667 | -0.167760 | -0.167121 |
| 8  | -4.901294 | -1.467282 | 0.192447  |
| 1  | -5.476154 | -1.496948 | 0.969217  |
| 1  | -5.344309 | -2.003212 | -0.479253 |
| 8  | 2.649898  | -3.003083 | -0.215365 |
| 1  | 3.411914  | -3.287232 | 0.313318  |
| 1  | 2.472487  | -3.747777 | -0.810842 |

-----

Cartesian coordinates of : 630-5

-----

Atomic number (AN) and Cartesian coordinates

| AN | X         | Y         | Z         |
|----|-----------|-----------|-----------|
| 1  | 2.160362  | 2.494751  | -0.032898 |
| 1  | 2.950508  | 1.735825  | 1.070090  |
| 1  | 3.263807  | -0.368443 | -1.549015 |
| 1  | 2.323689  | -1.469515 | -2.107595 |
| 1  | -1.225046 | -1.914556 | -0.508374 |

---

|    |           |           |           |
|----|-----------|-----------|-----------|
| 1  | 0.082339  | -2.751331 | -0.354390 |
| 1  | 0.161420  | 1.093613  | -2.399471 |
| 1  | -0.747453 | 1.686780  | -1.229630 |
| 26 | 0.931387  | -0.095163 | -0.002780 |
| 1  | -1.383284 | 0.458069  | 1.428362  |
| 1  | -0.246442 | 1.377659  | 1.986545  |
| 1  | 2.792321  | -1.629794 | 1.545286  |
| 1  | 1.579070  | -1.274034 | 2.457388  |
| 8  | -0.404259 | 0.548380  | 1.512877  |
| 8  | 0.072154  | 1.152345  | -1.438987 |
| 8  | -0.249586 | -1.845665 | -0.426094 |
| 8  | 2.428576  | -0.831835 | -1.386335 |
| 8  | 1.980781  | -1.103794 | 1.592280  |
| 8  | 2.279080  | 1.627286  | 0.381180  |
| 8  | -2.034351 | 2.463597  | -0.637385 |
| 1  | -2.447403 | 3.260349  | -0.996625 |
| 1  | -2.722478 | 1.948010  | -0.184526 |
| 8  | -3.091625 | 0.368588  | 0.997289  |
| 1  | -3.765057 | 0.497275  | 1.681992  |
| 1  | -3.329231 | -0.454750 | 0.530833  |
| 8  | -3.071648 | -2.049264 | -0.556103 |
| 1  | -3.447433 | -2.843514 | -0.144348 |
| 1  | -3.488728 | -2.009261 | -1.431114 |

---

Cartesian coordinates of the decamer :  $[\text{Fe}(\text{H}_2\text{O})_{10}]^{2+}$

Cartesian coordinates of : 640-3

---

Atomic number (AN) and Cartesian coordinates

| AN | X         | Y         | Z         |
|----|-----------|-----------|-----------|
| 1  | -0.639969 | 0.450861  | -2.726045 |
| 1  | 0.640056  | -0.450852 | -2.726011 |
| 1  | -2.178108 | -1.701101 | 0.115987  |
| 1  | -0.868294 | -2.623711 | 0.116081  |
| 1  | -0.450910 | -0.640031 | 2.726014  |
| 1  | 0.450825  | 0.639976  | 2.726038  |
| 1  | -2.623705 | 0.868272  | -0.116062 |
| 1  | -1.701092 | 2.178086  | -0.116071 |
| 26 | 0.000001  | 0.000008  | -0.000003 |
| 1  | 0.868320  | 2.623702  | 0.116122  |
| 1  | 2.178107  | 1.701051  | 0.116135  |
| 1  | 1.701071  | -2.178114 | -0.116052 |
| 1  | 2.623705  | -0.868321 | -0.116093 |
| 8  | 1.215561  | 1.725639  | 0.268318  |
| 8  | -1.725650 | 1.215540  | -0.268250 |
| 8  | -0.000007 | -0.000043 | 2.158667  |
| 8  | -1.215567 | -1.725646 | 0.268195  |
| 8  | 1.725649  | -1.215578 | -0.268293 |
| 8  | 0.000081  | 0.000079  | -2.158670 |
| 8  | -0.666009 | 3.840154  | 0.000036  |
| 1  | -0.730905 | 4.432028  | -0.764925 |
| 1  | -0.804205 | 4.419320  | 0.764993  |

|   |           |           |           |
|---|-----------|-----------|-----------|
| 8 | 0.665984  | -3.840184 | 0.000045  |
| 1 | 0.804152  | -4.419360 | 0.764999  |
| 1 | 0.730912  | -4.432046 | -0.764922 |
| 8 | -3.840192 | -0.665980 | -0.000037 |
| 1 | -4.419375 | -0.804080 | -0.764999 |
| 1 | -4.432052 | -0.730954 | 0.764927  |
| 8 | 3.840161  | 0.666009  | -0.000008 |
| 1 | 4.432054  | 0.730935  | 0.764935  |
| 1 | 4.419304  | 0.804191  | -0.764985 |

-----

Cartesian coordinates of : 640-4.log

-----

Atomic number (AN) and Cartesian coordinates

| AN | X         | Y         | Z         |
|----|-----------|-----------|-----------|
| 1  | -0.249002 | 1.906656  | 2.149540  |
| 1  | 1.243148  | 1.946916  | 1.631808  |
| 1  | 2.728718  | 0.719738  | 0.128796  |
| 1  | 2.605149  | -0.683596 | -0.622898 |
| 1  | 0.794201  | -1.984523 | -1.658454 |
| 1  | -0.567263 | -1.516164 | -2.282565 |
| 1  | -1.243074 | 1.946990  | -1.631776 |
| 1  | 0.249064  | 1.906624  | -2.149544 |
| 26 | 0.000003  | 0.056735  | 0.000007  |
| 1  | -2.605183 | -0.683536 | 0.622856  |
| 1  | -2.728708 | 0.719807  | -0.128828 |
| 1  | -0.794269 | -1.984516 | 1.658425  |
| 1  | 0.567122  | -1.516082 | 2.282630  |
| 1  | 3.679804  | 2.094680  | 2.068558  |
| 1  | 3.366886  | 3.068445  | 0.925103  |
| 1  | -3.679722 | 2.094791  | -2.068604 |
| 1  | -3.366805 | 3.068544  | -0.925139 |
| 8  | 3.077303  | 2.232628  | 1.321617  |
| 8  | 0.046798  | -1.522280 | 1.468175  |
| 8  | -0.380798 | 1.493891  | -1.544420 |
| 8  | 0.380879  | 1.493791  | 1.544524  |
| 8  | 2.116054  | 0.094909  | -0.299154 |
| 8  | -0.046852 | -1.522276 | -1.468165 |
| 8  | -3.077233 | 2.232722  | -1.321650 |
| 8  | -2.116063 | 0.094956  | 0.299117  |
| 8  | 2.640569  | -2.383623 | -1.562286 |
| 1  | 3.152408  | -2.419701 | -2.384908 |
| 1  | 2.878663  | -3.194892 | -1.088358 |
| 8  | -2.640652 | -2.383570 | 1.562241  |
| 1  | -2.878765 | -3.194837 | 1.088319  |
| 1  | -3.152491 | -2.419631 | 2.384863  |

-----

Cartesian coordinates of : 631-3.log

-----

Atomic number (AN) and Cartesian coordinates

| AN | X | Y | Z |
|----|---|---|---|
|----|---|---|---|

-----

---

|    |           |           |           |
|----|-----------|-----------|-----------|
| 1  | 0.692781  | -1.974866 | 1.782326  |
| 1  | 1.753225  | -0.900352 | 1.311165  |
| 1  | 1.970125  | 0.952449  | -0.110542 |
| 1  | 1.010924  | 2.030146  | -0.821943 |
| 1  | -1.438662 | 2.450663  | -0.887106 |
| 1  | -2.780676 | 1.689882  | -0.568442 |
| 1  | -0.409371 | 0.847527  | 3.048377  |
| 1  | -1.390105 | 1.877826  | 2.398544  |
| 26 | -0.615932 | 0.110135  | 0.345344  |
| 1  | -2.735367 | -1.833928 | 0.225521  |
| 1  | -2.866913 | -1.144548 | 1.632134  |
| 1  | -1.273178 | -1.776756 | -1.623798 |
| 1  | 0.047809  | -1.044899 | -2.100444 |
| 1  | 3.864641  | -0.556590 | 0.190088  |
| 1  | 3.775906  | 0.365619  | 1.440974  |
| 1  | 5.486030  | -1.058164 | -1.494053 |
| 1  | 5.321904  | -2.288037 | -0.583108 |
| 8  | 3.230267  | -0.052608 | 0.759068  |
| 8  | -0.646691 | -1.050218 | -1.428646 |
| 8  | -0.950558 | 1.025766  | 2.265971  |
| 8  | 0.793837  | -1.070140 | 1.458357  |
| 8  | 1.055592  | 1.151244  | -0.404637 |
| 8  | -1.840487 | 1.739521  | -0.348432 |
| 8  | 4.897073  | -1.458894 | -0.840758 |
| 8  | -2.406120 | -1.104113 | 0.783422  |
| 8  | -0.035887 | 3.497771  | -1.592936 |
| 1  | 0.066394  | 4.389493  | -1.226386 |
| 1  | 0.014459  | 3.621105  | -2.553158 |
| 8  | -2.726312 | -2.906579 | -1.372946 |
| 1  | -3.483362 | -2.822686 | -1.972964 |
| 1  | -2.578022 | -3.861407 | -1.293840 |

---

Cartesian coordinates of : 541-2.log

---

Atomic number (AN) and Cartesian coordinates

| AN | X         | Y         | Z         |
|----|-----------|-----------|-----------|
| 8  | -1.076692 | 1.440103  | -0.695813 |
| 1  | -0.831959 | 2.359419  | -0.909643 |
| 26 | 0.224367  | 0.013639  | 0.120338  |
| 8  | 1.781079  | -1.369215 | 0.370760  |
| 1  | 2.713013  | -1.093723 | 0.463165  |
| 8  | -0.724819 | -1.419851 | -1.049646 |
| 1  | -0.421537 | -2.337102 | -1.180253 |
| 1  | -1.906180 | 1.183231  | -1.140738 |
| 1  | 1.735788  | -2.274079 | 0.005939  |
| 1  | -1.644820 | -1.300599 | -1.353189 |
| 8  | 1.671727  | 1.502093  | 0.073901  |
| 1  | 2.623383  | 1.347834  | 0.225231  |
| 1  | 1.509205  | 2.419528  | -0.219137 |
| 8  | -3.204620 | -0.205976 | -1.291860 |
| 1  | -3.893571 | -0.244625 | -1.971356 |
| 1  | -3.658362 | -0.253009 | -0.432008 |
| 8  | 4.114721  | 0.215424  | 0.604955  |

---

|   |           |           |           |
|---|-----------|-----------|-----------|
| 1 | 4.557441  | 0.310409  | 1.462270  |
| 1 | 4.835744  | 0.187727  | -0.042499 |
| 8 | 0.913723  | -3.711223 | -0.953255 |
| 1 | 0.699873  | -4.516296 | -0.457517 |
| 1 | 1.340396  | -4.027910 | -1.764194 |
| 8 | 0.432993  | 3.818883  | -0.908453 |
| 1 | 0.254791  | 4.579870  | -0.334967 |
| 1 | 0.679204  | 4.205090  | -1.762909 |
| 8 | -0.818298 | -0.147509 | 1.900945  |
| 1 | -0.496633 | -0.455679 | 2.759041  |
| 1 | -1.802365 | -0.135227 | 1.917262  |
| 8 | -3.591762 | -0.136210 | 1.645614  |
| 1 | -4.075649 | -0.866092 | 2.063044  |
| 1 | -4.035706 | 0.664477  | 1.966500  |

---

Cartesian coordinates of : 631-4.log

---

Atomic number (AN) and Cartesian coordinates

| AN | X         | Y         | Z         |
|----|-----------|-----------|-----------|
| 1  | 2.238619  | -2.689209 | 0.232065  |
| 1  | 2.765178  | -2.337459 | -1.188114 |
| 1  | 4.011065  | 0.132304  | 0.679565  |
| 1  | 3.440897  | 1.494511  | 1.156649  |
| 1  | -0.397403 | 2.209980  | 0.432726  |
| 1  | 0.929788  | 2.779731  | -0.155824 |
| 1  | 1.137620  | -0.499332 | 2.592624  |
| 1  | -0.101126 | -1.190225 | 1.860447  |
| 26 | 1.332971  | -0.000762 | -0.129247 |
| 1  | -1.326311 | -0.420248 | -0.774824 |
| 1  | -0.486724 | -1.606667 | -1.371640 |
| 1  | 2.854611  | 0.865612  | -2.400363 |
| 1  | 1.403396  | 0.544349  | -2.873939 |
| 8  | -0.417435 | -0.684360 | -1.087028 |
| 8  | 0.809431  | -0.788465 | 1.730914  |
| 8  | 0.516841  | 1.967356  | 0.167480  |
| 8  | 3.245445  | 0.721654  | 0.607133  |
| 8  | 2.014224  | 0.471484  | -2.125652 |
| 8  | 2.357208  | -1.960836 | -0.395243 |
| 8  | -1.577775 | -1.791572 | 1.793977  |
| 1  | -2.017350 | -2.370159 | 2.430291  |
| 1  | -2.256612 | -1.264354 | 1.331822  |
| 8  | -2.770440 | -0.032057 | -0.016343 |
| 1  | -3.619615 | -0.244545 | -0.474227 |
| 1  | -2.827615 | 0.895806  | 0.269792  |
| 8  | -2.117742 | 2.669639  | 0.858306  |
| 1  | -2.514544 | 3.398546  | 0.356530  |
| 1  | -2.299909 | 2.883980  | 1.786281  |
| 8  | -5.103254 | -0.690036 | -1.232555 |
| 1  | -5.363917 | -0.577615 | -2.155831 |
| 1  | -5.879329 | -1.047644 | -0.781520 |

---

Cartesian coordinates of : 433-2.log

---

-----  
Atomic number (AN) and Cartesian coordinates

| AN | X         | Y         | Z         |
|----|-----------|-----------|-----------|
| 1  | 0.435131  | -1.437766 | -1.406831 |
| 1  | -1.148229 | -1.118506 | -1.401621 |
| 1  | -0.800749 | 2.034165  | 0.569186  |
| 1  | -1.862878 | 1.114516  | -0.250140 |
| 1  | 1.704798  | 1.363646  | 0.762113  |
| 1  | 2.157414  | 0.084183  | -0.114965 |
| 26 | -0.145942 | -0.461872 | 0.900295  |
| 1  | 2.564047  | -0.716535 | -2.420137 |
| 1  | 2.813410  | -1.860789 | -1.393396 |
| 1  | -3.457394 | -0.309745 | -1.378245 |
| 1  | -2.698683 | 0.481167  | -2.483986 |
| 1  | 0.790894  | 3.455319  | 1.740537  |
| 1  | 1.000898  | 3.657277  | 0.217280  |
| 1  | -1.069923 | -1.532522 | 3.242052  |
| 1  | 0.290441  | -2.239903 | 2.952807  |
| 8  | -1.292092 | 1.180774  | 0.549073  |
| 8  | 0.751207  | 2.980423  | 0.896748  |
| 8  | 1.690786  | 0.383048  | 0.697346  |
| 8  | 2.247506  | -1.067536 | -1.574733 |
| 8  | -0.385952 | -1.430933 | -0.865440 |
| 8  | -2.575989 | 0.079387  | -1.611297 |
| 8  | -0.331677 | -1.576806 | 2.614355  |
| 8  | 3.674366  | -3.251783 | -0.896519 |
| 1  | 3.572943  | -4.112001 | -1.326429 |
| 1  | 4.592383  | -3.221050 | -0.594248 |
| 8  | -4.887844 | -1.043950 | -0.803239 |
| 1  | -5.657958 | -0.539870 | -0.507029 |
| 1  | -5.241946 | -1.865779 | -1.169522 |
| 8  | 1.436930  | 4.771589  | -1.005410 |
| 1  | 2.336401  | 5.103414  | -1.129479 |
| 1  | 0.855567  | 5.475745  | -1.322703 |

---

**Cartesian coordinates of all the proposed isomers of  
[Fe<sup>2+</sup>(H<sub>2</sub>O)<sub>n=1-10</sub>] at MP2/6-31++G(d,p) level of theory at  
singlet spin-state**

Cartesian coordinates of the monomer : [Fe(H<sub>2</sub>O)<sub>1</sub>]<sup>2+</sup>

Cartesian coordinates of : 100-1.log

-----  
Atomic number (AN) and Cartesian coordinates

| AN | X         | Y         | Z        |
|----|-----------|-----------|----------|
| 8  | 1.340133  | 0.000000  | 0.000000 |
| 1  | 1.929388  | 0.789973  | 0.000001 |
| 1  | 1.929390  | -0.789972 | 0.000001 |
| 26 | -0.560763 | 0.000000  | 0.000000 |

-----

Cartesian coordinates of the dimer : [Fe(H<sub>2</sub>O)<sub>2</sub>]<sup>2+</sup>

Cartesian coordinates of : 200-1.log

-----  
Atomic number (AN) and Cartesian coordinates

| AN | X         | Y         | Z         |
|----|-----------|-----------|-----------|
| 8  | 1.484878  | 0.639446  | 0.000000  |
| 1  | 1.971709  | 0.949262  | -0.789771 |
| 1  | 1.971690  | 0.949285  | 0.789773  |
| 26 | -0.006205 | -0.558946 | 0.000000  |
| 8  | -1.478394 | 0.674883  | -0.000001 |
| 1  | -1.396587 | 1.650840  | -0.000006 |
| 1  | -2.437342 | 0.468563  | 0.000002  |

-----

Cartesian coordinates of : 200-2.log

-----  
Atomic number (AN) and Cartesian coordinates

| AN | X         | Y         | Z         |
|----|-----------|-----------|-----------|
| 8  | -1.505303 | 0.517375  | 0.000001  |
| 1  | -1.978444 | 0.833087  | 0.804122  |
| 1  | -1.978449 | 0.833132  | -0.804099 |
| 26 | 0.000001  | -0.446556 | -0.000002 |
| 8  | 1.505300  | 0.517377  | 0.000001  |
| 1  | 1.978444  | 0.833092  | 0.804120  |
| 1  | 1.978439  | 0.833135  | -0.804102 |

-----

Cartesian coordinates of the trimer :  $[\text{Fe}(\text{H}_2\text{O})_3]^{2+}$

Cartesian coordinates of : 300-1.log

-----  
Atomic number (AN) and Cartesian coordinates

| AN | X         | Y         | Z         |
|----|-----------|-----------|-----------|
| 8  | -0.648210 | 1.581411  | 0.391485  |
| 1  | -0.501716 | 2.510688  | 0.134852  |
| 8  | -1.045454 | -1.352058 | 0.391491  |
| 1  | -0.715988 | -1.909479 | 1.119188  |
| 1  | -1.923465 | -1.689838 | 0.134821  |
| 8  | 1.693650  | -0.229348 | 0.391493  |
| 1  | 2.011634  | 0.334696  | 1.119195  |
| 1  | 2.425186  | -0.820845 | 0.134854  |
| 26 | 0.000005  | -0.000001 | -0.506072 |
| 1  | -1.295668 | 1.574775  | 1.119196  |

-----

Cartesian coordinates of : 210-1.log

-----  
Atomic number (AN) and Cartesian coordinates

| AN | X         | Y         | Z         |
|----|-----------|-----------|-----------|
| 8  | 0.118935  | -1.393693 | 0.000012  |
| 1  | 1.093097  | -1.158247 | 0.000008  |
| 26 | -1.113138 | 0.000022  | -0.000008 |
| 8  | 0.119012  | 1.393661  | 0.000014  |
| 1  | 1.093168  | 1.158153  | 0.000014  |
| 8  | 2.369005  | -0.000020 | -0.000009 |
| 1  | 2.965247  | -0.000020 | 0.772256  |
| 1  | -0.015443 | -2.361742 | 0.000048  |
| 1  | 2.965217  | -0.000015 | -0.772297 |
| 1  | -0.015317 | 2.361716  | 0.000037  |

-----

Cartesian coordinates of : 300-2.log

-----  
Atomic number (AN) and Cartesian coordinates

| AN | X         | Y         | Z         |
|----|-----------|-----------|-----------|
| 8  | -0.391155 | 1.754439  | 0.000003  |
| 1  | -0.514310 | 2.306849  | 0.800235  |
| 26 | 0.000001  | -0.000002 | -0.000002 |
| 8  | -1.323814 | -1.215970 | 0.000002  |
| 1  | -1.740656 | -1.598813 | -0.800229 |
| 8  | 1.714970  | -0.538466 | -0.000001 |
| 1  | 2.254939  | -0.708018 | 0.800238  |
| 1  | -0.514350 | 2.306846  | -0.800226 |
| 1  | -1.740645 | -1.598827 | 0.800232  |
| 1  | 2.254975  | -0.708002 | -0.800219 |

-----



Cartesian coordinates of the tetramer :  $[\text{Fe}(\text{H}_2\text{O})_4]^{2+}$

Cartesian coordinates of : 400-1.log

-----  
Atomic number (AN) and Cartesian coordinates

| AN | X         | Y         | Z         |
|----|-----------|-----------|-----------|
| 8  | -1.970210 | -0.010293 | -0.528306 |
| 26 | -0.000062 | -0.029368 | -0.348661 |
| 1  | -2.547697 | 0.646768  | -0.105095 |
| 1  | -2.504204 | -0.465821 | -1.201985 |
| 8  | -0.000043 | 1.504537  | 0.888777  |
| 1  | -0.000689 | 2.454002  | 0.680816  |
| 1  | 0.000200  | 1.414545  | 1.856224  |
| 8  | 0.000361  | -1.439190 | 0.985739  |
| 1  | -0.786535 | -1.914501 | 1.300738  |
| 1  | 0.787589  | -1.914074 | 1.300557  |
| 8  | 1.970087  | -0.010005 | -0.528456 |
| 1  | 2.547306  | 0.647710  | -0.105890 |
| 1  | 2.504069  | -0.465438 | -1.202210 |

-----

Cartesian coordinates of : 400-2.log

-----  
Atomic number (AN) and Cartesian coordinates

| AN | X         | Y         | Z         |
|----|-----------|-----------|-----------|
| 8  | -1.977801 | 0.002789  | -0.482948 |
| 1  | -2.654313 | -0.049618 | 0.211984  |
| 26 | 0.000011  | -0.000030 | -0.290688 |
| 8  | 1.977822  | -0.002650 | -0.482935 |
| 1  | 2.454391  | -0.056335 | -1.329821 |
| 8  | 0.002127  | 1.595715  | 0.816858  |
| 1  | 0.779283  | 2.108947  | 1.091901  |
| 1  | -2.454382 | 0.055786  | -1.329870 |
| 1  | 2.654352  | 0.050154  | 0.211950  |
| 1  | -0.784102 | 2.069799  | 1.133544  |
| 8  | -0.002169 | -1.595781 | 0.816811  |
| 1  | 0.784018  | -2.069580 | 1.134027  |
| 1  | -0.779362 | -2.108947 | 1.091875  |

-----

Cartesian coordinates of : 310-1.log

-----  
Atomic number (AN) and Cartesian coordinates

| AN | X         | Y         | Z         |
|----|-----------|-----------|-----------|
| 1  | -1.484148 | 1.085412  | -0.265165 |
| 1  | -0.470096 | 2.337147  | -0.281714 |
| 1  | -0.319626 | -2.249508 | 0.631934  |
| 1  | -1.375051 | -1.183803 | 0.051503  |
| 1  | 1.754489  | -0.898987 | -1.661403 |

|    |           |           |           |
|----|-----------|-----------|-----------|
| 1  | 2.761554  | 0.230755  | -1.237270 |
| 26 | 0.767157  | 0.145256  | 0.493522  |
| 1  | -3.148723 | -0.288480 | -1.274711 |
| 1  | -3.489168 | -0.071946 | 0.212579  |
| 8  | -2.738944 | -0.140165 | -0.404317 |
| 8  | -0.571653 | 1.402157  | -0.036349 |
| 8  | -0.423978 | -1.349937 | 0.277767  |
| 8  | 1.962661  | -0.254211 | -0.963016 |

-----

Cartesian coordinates of : 310-2.log

-----

Atomic number (AN) and Cartesian coordinates

| AN | X         | Y         | Z         |
|----|-----------|-----------|-----------|
| 1  | 1.502023  | -1.285373 | 1.619039  |
| 1  | 2.797226  | -0.608588 | 1.038137  |
| 1  | -0.982099 | -1.924293 | -0.536442 |
| 1  | -1.786911 | -0.595531 | 0.003863  |
| 1  | 0.545459  | 2.008890  | 1.082726  |
| 1  | -0.265423 | 2.391098  | -0.208223 |
| 1  | -3.435823 | -0.126017 | 1.246374  |
| 1  | -3.759376 | 0.113963  | -0.252836 |
| 26 | 0.743224  | -0.024747 | -0.527711 |
| 8  | -0.861467 | -0.992494 | -0.288026 |
| 8  | 0.317265  | 1.717150  | 0.183418  |
| 8  | 1.830112  | -0.669866 | 0.940899  |
| 8  | -3.028273 | 0.028867  | 0.379690  |

-----

Cartesian coordinates of : 310-3.log

-----

Atomic number (AN) and Cartesian coordinates

| AN | X         | Y         | Z         |
|----|-----------|-----------|-----------|
| 8  | -2.196749 | -1.101124 | 0.220178  |
| 1  | -2.560361 | -1.263293 | 1.108298  |
| 26 | -0.501757 | -0.170665 | -0.186100 |
| 8  | 1.262396  | 0.393762  | -0.659424 |
| 1  | 2.153323  | 0.071408  | -0.205789 |
| 8  | -1.157807 | 1.544443  | 0.397004  |
| 1  | -0.606912 | 2.339711  | 0.492102  |
| 1  | -2.705068 | -1.657585 | -0.396436 |
| 1  | 1.485067  | 0.915944  | -1.447070 |
| 1  | -2.088529 | 1.799292  | 0.514390  |
| 8  | 3.297174  | -0.433689 | 0.491006  |
| 1  | 3.878470  | -1.114478 | 0.117850  |
| 1  | 3.849581  | 0.119140  | 1.065135  |

-----

Cartesian coordinates of : 310-4.log

-----

Atomic number (AN) and Cartesian coordinates

---

| AN | X         | Y         | Z         |
|----|-----------|-----------|-----------|
| 8  | 2.486013  | -0.441923 | 0.000001  |
| 1  | 3.034065  | -0.625628 | 0.783611  |
| 26 | 0.694848  | 0.355085  | 0.000002  |
| 8  | -0.933412 | 1.398420  | -0.000013 |
| 1  | -1.045439 | 2.363616  | 0.000051  |
| 8  | -0.319809 | -1.275677 | -0.000005 |
| 1  | -1.317092 | -1.264062 | 0.000005  |
| 1  | 3.034086  | -0.625604 | -0.783599 |
| 1  | -1.818390 | 0.956926  | -0.000002 |
| 1  | 0.007252  | -2.191972 | -0.000022 |
| 8  | -2.866811 | -0.501350 | 0.000003  |
| 1  | -3.444203 | -0.640609 | -0.771333 |
| 1  | -3.444177 | -0.640641 | 0.771353  |

---

Cartesian coordinates of : 220-1.log

---

Atomic number (AN) and Cartesian coordinates

| AN | X         | Y         | Z         |
|----|-----------|-----------|-----------|
| 8  | -1.670369 | -0.470059 | -0.416343 |
| 1  | -2.292873 | 0.406479  | -0.225575 |
| 26 | -0.000002 | -0.863457 | 0.298710  |
| 8  | 1.670378  | -0.470070 | -0.416321 |
| 1  | 2.292873  | 0.406476  | -0.225563 |
| 8  | -3.018787 | 1.492641  | 0.088499  |
| 1  | -3.169706 | 2.211682  | -0.545599 |
| 1  | -2.077391 | -0.993127 | -1.129008 |
| 1  | 2.077416  | -0.993160 | -1.128960 |
| 1  | -3.814806 | 1.419274  | 0.639642  |
| 8  | 3.018781  | 1.492650  | 0.088487  |
| 1  | 3.169708  | 2.211678  | -0.545625 |
| 1  | 3.814789  | 1.419303  | 0.639650  |

---

Cartesian coordinates of the pentamer :  $[\text{Fe}(\text{H}_2\text{O})_5]^{2+}$

Cartesian coordinates of : 500-1.log

---

Atomic number (AN) and Cartesian coordinates

| AN | X         | Y         | Z         |
|----|-----------|-----------|-----------|
| 8  | 0.002370  | -1.983984 | -0.323159 |
| 1  | -0.779215 | -2.534377 | -0.488218 |
| 26 | 0.000729  | 0.000002  | -0.218995 |
| 8  | -0.000617 | 1.983982  | -0.323145 |
| 1  | 0.780840  | 2.534698  | -0.487693 |
| 8  | -2.008479 | -0.001398 | -0.297980 |
| 1  | -2.589403 | -0.001812 | -1.075494 |
| 1  | 0.784749  | -2.533456 | -0.487488 |
| 1  | -0.783129 | 2.533158  | -0.487871 |

|   |           |           |           |
|---|-----------|-----------|-----------|
| 1 | -2.578825 | -0.002240 | 0.486751  |
| 8 | -0.006858 | -0.000029 | 1.756977  |
| 1 | -0.001399 | 0.785906  | 2.325219  |
| 1 | -0.000047 | -0.785976 | 2.325188  |
| 8 | 2.010448  | 0.001435  | -0.292621 |
| 1 | 2.580330  | 0.002202  | 0.492425  |
| 1 | 2.592231  | 0.001805  | -1.069519 |

-----

Cartesian coordinates of : 410-1.log

-----

Atomic number (AN) and Cartesian coordinates

| AN | X         | Y         | Z         |
|----|-----------|-----------|-----------|
| 1  | 1.508668  | 1.163407  | 0.564298  |
| 1  | 0.234802  | 1.886106  | 1.195757  |
| 1  | 1.146956  | -1.843745 | -1.403925 |
| 1  | 1.940556  | -0.803541 | -0.498303 |
| 1  | -0.652259 | -2.073888 | 1.329925  |
| 1  | -1.806142 | -1.100296 | 1.751327  |
| 26 | -0.557633 | -0.090536 | -0.341560 |
| 1  | 3.646489  | 0.098280  | 0.946278  |
| 1  | 3.685007  | 0.869843  | -0.385573 |
| 8  | 3.083024  | 0.391983  | 0.210328  |
| 8  | 0.527815  | 1.268331  | 0.508223  |
| 8  | 1.048054  | -1.164813 | -0.717030 |
| 8  | -1.171627 | -1.303940 | 1.045238  |
| 8  | -2.215518 | 1.003686  | -0.265514 |
| 1  | -3.119492 | 0.655366  | -0.347654 |
| 1  | -2.260117 | 1.940436  | -0.521539 |

-----

Cartesian coordinates of : 410-2.log

-----

Atomic number (AN) and Cartesian coordinates

| AN | X         | Y         | Z         |
|----|-----------|-----------|-----------|
| 8  | -1.357365 | 0.729955  | -0.207480 |
| 1  | -1.483908 | 1.642173  | -0.506685 |
| 26 | 0.350337  | -0.097239 | 0.177528  |
| 8  | 1.914610  | -1.097503 | 0.894035  |
| 1  | 2.696892  | -0.643309 | 1.248421  |
| 8  | 0.759192  | -0.586120 | -1.661786 |
| 1  | 1.468762  | -1.189315 | -1.936909 |
| 1  | -2.275037 | 0.320434  | -0.003885 |
| 1  | 1.931335  | -2.005376 | 1.240220  |
| 1  | 0.133415  | -0.497155 | -2.398832 |
| 8  | 1.417272  | 1.564438  | 0.212929  |
| 1  | 1.899067  | 1.884444  | -0.567491 |
| 1  | 1.287679  | 2.324941  | 0.803456  |
| 8  | -3.548883 | -0.404953 | 0.347936  |
| 1  | -4.166207 | -0.755406 | -0.311410 |
| 1  | -4.079372 | -0.199737 | 1.132323  |

-----

Cartesian coordinates of : 320-1.log

-----  
Atomic number (AN) and Cartesian coordinates

| AN | X         | Y         | Z         |
|----|-----------|-----------|-----------|
| 1  | 1.861021  | 1.292428  | 0.127648  |
| 1  | 0.688760  | 2.319760  | -0.262927 |
| 1  | 1.309239  | -2.312045 | -0.033790 |
| 1  | 2.131599  | -0.984294 | 0.344380  |
| 1  | -1.327830 | -0.858212 | 1.482337  |
| 1  | -2.462309 | -0.102946 | 0.562342  |
| 26 | -0.102204 | -0.162592 | -0.633459 |
| 1  | 3.535930  | 0.490131  | 1.635582  |
| 1  | 4.072332  | 0.440255  | 0.191895  |
| 8  | 3.252881  | 0.373689  | 0.712302  |
| 8  | 0.966602  | 1.389846  | -0.287377 |
| 8  | 1.265263  | -1.344653 | 0.034749  |
| 8  | -1.483442 | -0.459100 | 0.612133  |
| 8  | -3.804161 | 0.410518  | 0.360054  |
| 1  | -4.542318 | -0.160339 | 0.096911  |
| 1  | -4.186257 | 1.140258  | 0.870669  |

-----

Cartesian coordinates of : 320-2.log

-----  
Atomic number (AN) and Cartesian coordinates

| AN | X         | Y         | Z         |
|----|-----------|-----------|-----------|
| 8  | 1.635988  | -0.952368 | -0.561269 |
| 1  | 2.170598  | -0.116284 | -0.623957 |
| 26 | 0.000012  | -0.924785 | 0.425493  |
| 8  | -1.635984 | -0.952237 | -0.561183 |
| 1  | -2.021985 | -1.648043 | -1.117777 |
| 8  | 0.000136  | 0.967208  | 0.704803  |
| 1  | -0.806639 | 1.484600  | 0.485888  |
| 1  | 2.021900  | -1.648241 | -1.117844 |
| 1  | -2.170513 | -0.116062 | -0.623784 |
| 1  | 0.806925  | 1.484485  | 0.485578  |
| 8  | -2.561011 | 1.528861  | -0.247918 |
| 1  | -3.296736 | 1.686750  | 0.368838  |
| 1  | -2.731729 | 2.133154  | -0.990437 |
| 8  | 2.560848  | 1.529004  | -0.247914 |
| 1  | 3.296480  | 1.687000  | 0.368927  |
| 1  | 2.731566  | 2.133317  | -0.990417 |

-----

Cartesian coordinates of : 230.log

-----  
Atomic number (AN) and Cartesian coordinates

| AN | X         | Y        | Z         |
|----|-----------|----------|-----------|
| 8  | -1.864464 | 0.887942 | -0.255356 |

-----

|    |           |           |           |
|----|-----------|-----------|-----------|
| 1  | -2.008775 | 1.709514  | -0.755407 |
| 26 | -0.272694 | 0.479292  | 0.625633  |
| 8  | 1.356776  | -0.170850 | 0.105932  |
| 1  | 1.586508  | -1.172502 | 0.002588  |
| 8  | 1.792895  | -2.640964 | -0.057912 |
| 1  | 2.316823  | -3.118666 | 0.603009  |
| 1  | -2.700753 | 0.235321  | -0.412691 |
| 1  | 2.116615  | 0.430770  | -0.247250 |
| 1  | 1.873978  | -3.139931 | -0.884429 |
| 8  | 3.111047  | 1.449234  | -0.687062 |
| 1  | 3.876142  | 1.696745  | -0.145743 |
| 1  | 3.374278  | 1.584658  | -1.609725 |
| 8  | -3.746021 | -0.657744 | -0.532300 |
| 1  | -4.568966 | -0.545399 | -0.030645 |
| 1  | -3.977668 | -1.083039 | -1.372585 |

-----

Cartesian coordinates of : 320-3.log

-----

Atomic number (AN) and Cartesian coordinates

| AN | X         | Y         | Z         |
|----|-----------|-----------|-----------|
| 8  | -0.000022 | 2.250522  | -0.000009 |
| 1  | -0.401892 | 2.811433  | 0.689427  |
| 26 | -0.000002 | 0.437985  | -0.000002 |
| 8  | -1.313285 | -0.456210 | -0.749165 |
| 1  | -1.248647 | -0.714004 | -1.687601 |
| 8  | 1.313306  | -0.456163 | 0.749173  |
| 1  | 1.248680  | -0.713955 | 1.687611  |
| 1  | 0.401852  | 2.811435  | -0.689441 |
| 1  | -2.260982 | -0.802066 | -0.288219 |
| 1  | 2.261001  | -0.802037 | 0.288219  |
| 8  | 3.372301  | -1.183140 | -0.299604 |
| 1  | 4.224207  | -0.764965 | -0.097685 |
| 1  | 3.540419  | -2.111707 | -0.524612 |
| 8  | -3.372297 | -1.183142 | 0.299608  |
| 1  | -4.224201 | -0.764980 | 0.097648  |
| 1  | -3.540417 | -2.111697 | 0.524662  |

-----

Cartesian coordinates of : 500-2.log

-----

Atomic number (AN) and Cartesian coordinates

| AN | X         | Y         | Z         |
|----|-----------|-----------|-----------|
| 8  | -1.947884 | -0.589233 | -0.037888 |
| 1  | -2.411397 | -1.001126 | 0.710906  |
| 26 | 0.000000  | 0.000001  | 0.023502  |
| 8  | 1.229529  | 1.621628  | -0.038176 |
| 1  | 2.066811  | 1.566970  | -0.529270 |
| 8  | -1.162320 | 1.670460  | -0.038129 |
| 1  | -0.851655 | 2.449849  | -0.529294 |
| 1  | -2.593181 | -0.052950 | -0.529004 |
| 1  | 1.362400  | 2.227451  | 0.710501  |

---

|   |           |           |           |
|---|-----------|-----------|-----------|
| 1 | -1.697345 | 1.984074  | 0.710595  |
| 8 | -0.041540 | -2.034628 | -0.037783 |
| 1 | 0.207051  | -2.602701 | 0.711008  |
| 1 | -0.751039 | -2.482646 | -0.528796 |
| 8 | 1.922210  | -0.668245 | -0.037962 |
| 1 | 2.539382  | -0.607332 | 0.710757  |
| 1 | 2.129002  | -1.481483 | -0.528965 |

---

Cartesian coordinates of the hexamer :  $[\text{Fe}(\text{H}_2\text{O})_6]^{2+}$

Cartesian coordinates of : 600-1.log

---

Atomic number (AN) and Cartesian coordinates

| AN | X         | Y         | Z         |
|----|-----------|-----------|-----------|
| 1  | -1.026507 | -2.454259 | -0.517249 |
| 1  | -1.938076 | -1.390265 | -1.207847 |
| 1  | 1.026771  | -0.779153 | -2.383971 |
| 1  | 1.938233  | 0.350962  | -1.807728 |
| 1  | 1.938073  | 1.390262  | 1.207850  |
| 1  | 1.026506  | 2.454257  | 0.517249  |
| 1  | 1.938235  | -1.740955 | 0.600118  |
| 1  | 1.026636  | -1.674993 | 1.866852  |
| 26 | 0.000000  | -0.000000 | -0.000000 |
| 1  | -1.026770 | 0.779149  | 2.383970  |
| 1  | -1.938234 | -0.350964 | 1.807727  |
| 1  | -1.026646 | 1.674984  | -1.866858 |
| 1  | -1.938237 | 1.740954  | -0.600117 |
| 8  | -1.209171 | 0.250755  | 1.592618  |
| 8  | 1.209085  | -1.253863 | 1.013581  |
| 8  | 1.208997  | 1.504747  | 0.579192  |
| 8  | 1.209170  | -0.250755 | -1.592620 |
| 8  | -1.209082 | 1.253869  | -1.013578 |
| 8  | -1.208997 | -1.504749 | -0.579192 |

---

Cartesian coordinates of : 510-1.log

---

Atomic number (AN) and Cartesian coordinates

| AN | X         | Y         | Z         |
|----|-----------|-----------|-----------|
| 8  | -1.755956 | 1.473368  | -0.459254 |
| 1  | -1.572420 | 2.336399  | -0.863025 |
| 26 | -0.405936 | 0.026553  | -0.174955 |
| 8  | 0.991003  | -1.373639 | -0.066379 |
| 1  | 0.869474  | -2.300605 | -0.319267 |
| 8  | 1.027745  | 1.378948  | 0.000407  |
| 1  | 1.975553  | 1.112269  | -0.021341 |
| 1  | -2.683271 | 1.266182  | -0.657006 |
| 1  | 1.947343  | -1.151969 | -0.127856 |
| 1  | 0.966812  | 2.239799  | 0.439437  |
| 8  | -0.913249 | -0.191071 | 1.724524  |

|   |           |           |           |
|---|-----------|-----------|-----------|
| 1 | -0.313144 | -0.620048 | 2.354960  |
| 1 | -1.405826 | 0.486013  | 2.215180  |
| 8 | -1.832894 | -1.327694 | -0.612970 |
| 1 | -2.280948 | -1.840088 | 0.078175  |
| 1 | -2.078581 | -1.713218 | -1.468209 |
| 8 | 3.381190  | -0.018576 | -0.169014 |
| 1 | 4.026713  | -0.076218 | 0.554730  |
| 1 | 3.919933  | 0.040403  | -0.975459 |

-----

Cartesian coordinates of : 420-1.log

-----

Atomic number (AN) and Cartesian coordinates

| AN | X         | Y         | Z         |
|----|-----------|-----------|-----------|
| 8  | 1.587301  | 1.160198  | -0.666635 |
| 1  | 1.752356  | 1.868233  | -1.308124 |
| 26 | 0.000002  | -0.000010 | -0.548416 |
| 8  | -1.587323 | -1.160182 | -0.666641 |
| 1  | -2.443529 | -0.882092 | -0.266094 |
| 8  | 1.003917  | -1.241393 | 0.535251  |
| 1  | 0.625905  | -1.977774 | 1.038321  |
| 1  | 2.443502  | 0.882103  | -0.266078 |
| 1  | -1.752357 | -1.868284 | -1.308062 |
| 1  | 1.930282  | -1.071175 | 0.823249  |
| 8  | -1.003907 | 1.241392  | 0.535234  |
| 1  | -1.930264 | 1.071179  | 0.823255  |
| 1  | -0.625867 | 1.977765  | 1.038294  |
| 8  | 3.504386  | -0.177485 | 0.750973  |
| 1  | 3.880589  | 0.200327  | 1.563286  |
| 1  | 4.248397  | -0.632634 | 0.322071  |
| 8  | -3.504384 | 0.177501  | 0.750981  |
| 1  | -4.248388 | 0.632675  | 0.322096  |
| 1  | -3.880587 | -0.200317 | 1.563292  |

-----

Cartesian coordinates of : 420-2.log

-----

Atomic number (AN) and Cartesian coordinates

| AN | X         | Y         | Z         |
|----|-----------|-----------|-----------|
| 1  | 2.363127  | 1.116890  | -0.009692 |
| 1  | 1.336164  | 2.263292  | -0.386124 |
| 1  | 1.336128  | -2.263266 | 0.386191  |
| 1  | 2.363112  | -1.116904 | 0.009698  |
| 1  | -2.363132 | 1.116866  | 0.009688  |
| 1  | -1.336180 | 2.263284  | 0.386095  |
| 26 | 0.000008  | 0.000014  | 0.000003  |
| 1  | -1.336143 | -2.263249 | -0.386161 |
| 1  | -2.363116 | -1.116868 | -0.009698 |
| 1  | 4.362580  | -0.025877 | -0.770061 |
| 1  | 4.362592  | 0.025818  | 0.770036  |
| 1  | -4.362598 | 0.025804  | -0.770041 |
| 1  | -4.362589 | -0.025881 | 0.770058  |



|   |           |           |           |
|---|-----------|-----------|-----------|
| 8 | 1.410740  | 1.372403  | -0.012681 |
| 8 | 3.770178  | -0.000025 | -0.000008 |
| 8 | 1.410720  | -1.372400 | 0.012696  |
| 8 | -1.410724 | -1.372367 | -0.012705 |
| 8 | -1.410746 | 1.372381  | 0.012685  |
| 8 | -3.770187 | -0.000029 | 0.000005  |

-----

Cartesian coordinates of : 420-3.log

-----

Atomic number (AN) and Cartesian coordinates

| AN | X         | Y         | Z         |
|----|-----------|-----------|-----------|
| 8  | 0.915136  | 0.865511  | 1.078989  |
| 1  | 0.600279  | 1.285224  | 1.892390  |
| 26 | -0.110008 | -0.239694 | -0.136018 |
| 8  | 0.017184  | -2.098641 | 0.416430  |
| 1  | 0.813852  | -2.643369 | 0.320802  |
| 8  | -1.839538 | 0.045092  | 0.713236  |
| 1  | -2.073630 | -0.099023 | 1.640813  |
| 1  | 1.866025  | 1.078255  | 0.935866  |
| 1  | -0.627936 | -2.592716 | 0.945197  |
| 1  | -2.645737 | 0.444895  | 0.235269  |
| 8  | 1.500125  | -0.422710 | -1.271196 |
| 1  | 1.528513  | -0.696941 | -2.200919 |
| 1  | 2.319142  | 0.084526  | -1.064210 |
| 8  | -3.765887 | 1.037060  | -0.621734 |
| 1  | -4.522804 | 0.522428  | -0.938335 |
| 1  | -4.071663 | 1.953427  | -0.554213 |
| 8  | 3.395930  | 1.103815  | -0.022898 |
| 1  | 3.696227  | 1.961653  | -0.367048 |
| 1  | 4.194347  | 0.692664  | 0.348246  |

-----

Cartesian coordinates of : 420-4.log

-----

Atomic number (AN) and Cartesian coordinates

| AN | X         | Y         | Z         |
|----|-----------|-----------|-----------|
| 1  | 0.382491  | 2.134409  | 0.667829  |
| 1  | -1.148502 | 2.165328  | 1.142217  |
| 1  | 1.744059  | -0.797625 | -0.630376 |
| 1  | 1.743897  | 0.797956  | -0.630367 |
| 1  | 0.382913  | -2.134331 | 0.667869  |
| 1  | -1.148039 | -2.165477 | 1.142370  |
| 26 | -0.693569 | -0.000074 | -0.310464 |
| 1  | 2.715471  | 2.616757  | 0.814075  |
| 1  | 2.157070  | 3.253311  | -0.469994 |
| 8  | 2.025514  | 2.507578  | 0.139067  |
| 8  | -0.478561 | 1.649084  | 0.671001  |
| 8  | 1.196936  | 0.000111  | -0.791575 |
| 8  | -0.478251 | -1.649209 | 0.670964  |
| 8  | -2.684809 | -0.000229 | -0.166012 |
| 1  | -3.301776 | -0.000481 | -0.916208 |

|   |           |           |           |
|---|-----------|-----------|-----------|
| 1 | -3.223399 | -0.000218 | 0.640363  |
| 8 | 2.026029  | -2.507165 | 0.139081  |
| 1 | 2.157710  | -3.252876 | -0.469980 |
| 1 | 2.716037  | -2.616201 | 0.814059  |

-----

Cartesian coordinates of : 330-1.log

-----

Atomic number (AN) and Cartesian coordinates

| AN | X         | Y         | Z         |
|----|-----------|-----------|-----------|
| 1  | 2.074168  | -1.309470 | -0.645674 |
| 1  | 1.033966  | -2.541823 | -0.719036 |
| 1  | 0.706386  | 1.859731  | 0.219798  |
| 1  | 2.032321  | 0.943149  | 0.104509  |
| 1  | -1.515185 | 1.161373  | -0.306175 |
| 1  | -2.393692 | -0.248937 | -0.298092 |
| 26 | 0.044145  | -0.535962 | 0.688013  |
| 1  | 3.684163  | 0.087020  | -1.630562 |
| 1  | 4.173521  | -0.355974 | -0.240837 |
| 8  | 3.365798  | -0.168175 | -0.748551 |
| 8  | 1.201745  | -1.667807 | -0.332723 |
| 8  | 1.141718  | 1.020691  | 0.506512  |
| 8  | -1.515843 | 0.215867  | -0.046364 |
| 8  | -3.633358 | -1.050005 | -0.585493 |
| 1  | -4.419827 | -1.032431 | -0.020230 |
| 1  | -3.938502 | -1.290574 | -1.472430 |
| 8  | -0.680083 | 2.871708  | -0.302316 |
| 1  | -1.003287 | 3.530304  | 0.335073  |
| 1  | -0.621612 | 3.354402  | -1.143192 |

-----

Cartesian coordinates of : 240.log

-----

Atomic number (AN) and Cartesian coordinates

| AN | X         | Y         | Z         |
|----|-----------|-----------|-----------|
| 8  | -1.745676 | -0.000002 | -0.080625 |
| 1  | -2.278101 | 0.847360  | 0.150172  |
| 26 | -0.000002 | -0.000010 | -0.644621 |
| 8  | 1.745679  | 0.000003  | -0.080657 |
| 1  | 2.278109  | -0.847353 | 0.150156  |
| 8  | 2.937440  | -2.173170 | 0.407406  |
| 1  | 3.133930  | -2.517542 | 1.291047  |
| 1  | -2.278099 | -0.847363 | 0.150186  |
| 1  | 2.278093  | 0.847368  | 0.150159  |
| 1  | 3.601317  | -2.552117 | -0.187906 |
| 8  | 2.937398  | 2.173200  | 0.407422  |
| 1  | 3.133879  | 2.517567  | 1.291067  |
| 1  | 3.601270  | 2.552165  | -0.187884 |
| 8  | -2.937412 | -2.173196 | 0.407421  |
| 1  | -3.133902 | -2.517577 | 1.291060  |
| 1  | -3.601284 | -2.552145 | -0.187894 |
| 8  | -2.937424 | 2.173190  | 0.407393  |

---

|   |           |          |           |
|---|-----------|----------|-----------|
| 1 | -3.133914 | 2.517580 | 1.291027  |
| 1 | -3.601298 | 2.552129 | -0.187927 |

---

Cartesian coordinates of : 330-2.log

---

Atomic number (AN) and Cartesian coordinates

| AN | X         | Y         | Z         |
|----|-----------|-----------|-----------|
| 8  | 0.590384  | -1.535106 | -0.693972 |
| 1  | 1.338306  | -2.105965 | -0.190003 |
| 26 | -0.132205 | 0.000003  | -0.191614 |
| 8  | 0.590367  | 1.535118  | -0.693976 |
| 1  | 0.306161  | 1.969611  | -1.517975 |
| 8  | -1.580577 | -0.000016 | 0.823229  |
| 1  | -1.511349 | -0.000004 | 1.794483  |
| 1  | 0.306185  | -1.969597 | -1.517975 |
| 1  | 1.338288  | 2.105983  | -0.190005 |
| 1  | -2.599684 | -0.000014 | 0.499507  |
| 8  | -3.904765 | -0.000010 | 0.036921  |
| 1  | -4.476918 | -0.781608 | 0.064161  |
| 1  | -4.476953 | 0.781559  | 0.064232  |
| 8  | 2.311212  | 2.827835  | 0.489690  |
| 1  | 3.223223  | 2.909766  | 0.172793  |
| 1  | 2.111977  | 3.621560  | 1.008676  |
| 8  | 2.311236  | -2.827828 | 0.489684  |
| 1  | 3.223253  | -2.909743 | 0.172799  |
| 1  | 2.112003  | -3.621564 | 1.008653  |

---

Cartesian coordinates of : 510-2.log

---

Atomic number (AN) and Cartesian coordinates

| AN | X         | Y         | Z         |
|----|-----------|-----------|-----------|
| 8  | -1.168543 | 1.889562  | -0.154743 |
| 1  | -0.557228 | 2.584603  | -0.449362 |
| 26 | -0.430190 | 0.001049  | 0.088148  |
| 8  | -1.011171 | -1.940032 | -0.118036 |
| 1  | -0.320928 | -2.616498 | -0.204117 |
| 8  | -2.455370 | -0.116064 | -0.287403 |
| 1  | -3.090432 | -0.437771 | 0.374360  |
| 1  | -1.798286 | 2.294518  | 0.464173  |
| 1  | -1.723105 | -2.153121 | -0.742389 |
| 1  | -2.912802 | 0.500772  | -0.881259 |
| 8  | 1.094232  | 1.298171  | 0.347804  |
| 1  | 1.991771  | 1.059434  | 0.014034  |
| 1  | 1.208025  | 1.737903  | 1.206849  |
| 8  | 1.124119  | -1.193504 | 0.504580  |
| 1  | 2.014279  | -1.002167 | 0.120879  |
| 1  | 1.249178  | -1.438439 | 1.437449  |
| 8  | 3.337684  | -0.003916 | -0.547886 |
| 1  | 4.197096  | 0.019238  | -0.094032 |
| 1  | 3.559757  | -0.049497 | -1.492964 |

-----  
 Cartesian coordinates of the heptamer : [Fe(H<sub>2</sub>O)<sub>7</sub>]<sup>2+</sup>

Cartesian coordinates of : 610-1.log

-----  
 Atomic number (AN) and Cartesian coordinates

| AN | X         | Y         | Z         |
|----|-----------|-----------|-----------|
| 1  | -0.129321 | -2.454966 | -1.030929 |
| 1  | -1.331495 | -2.505429 | -0.034613 |
| 1  | -2.252739 | -0.067362 | -1.942119 |
| 1  | -2.124311 | 1.428722  | -1.492247 |
| 1  | 0.426195  | 2.532847  | -0.057593 |
| 1  | -0.272552 | 2.324831  | 1.312530  |
| 1  | 0.930723  | 0.337831  | -2.333234 |
| 1  | 1.989930  | 0.123487  | -1.170292 |
| 26 | -0.398534 | 0.001632  | 0.005283  |
| 1  | 1.949462  | -0.331452 | 1.118158  |
| 1  | 0.974162  | -1.286970 | 1.876790  |
| 1  | -2.736789 | 0.062224  | 1.243971  |
| 1  | -1.696141 | -0.170343 | 2.378467  |
| 8  | 1.008361  | -0.469217 | 1.359212  |
| 8  | 1.035712  | 0.131900  | -1.394073 |
| 8  | -0.204808 | 1.968753  | 0.413713  |
| 8  | -1.862272 | 0.520926  | -1.278899 |
| 8  | -1.824522 | -0.216322 | 1.419104  |
| 8  | -0.753373 | -1.907528 | -0.532122 |
| 8  | 3.425123  | -0.028402 | 0.005936  |
| 1  | 4.038772  | -0.766524 | -0.141011 |
| 1  | 4.002221  | 0.729786  | 0.191800  |

-----  
 Cartesian coordinates of : 520-1.log

-----  
 Atomic number (AN) and Cartesian coordinates

| AN | X         | Y         | Z         |
|----|-----------|-----------|-----------|
| 8  | 1.429602  | -1.397190 | -0.033838 |
| 1  | 1.290975  | -2.304020 | -0.345286 |
| 26 | -0.000428 | -0.010937 | 0.017878  |
| 8  | -1.415697 | 1.376237  | -0.153003 |
| 1  | -1.238452 | 2.253722  | -0.524182 |
| 8  | -1.420603 | -1.400098 | -0.110771 |
| 1  | -2.344534 | -1.146821 | -0.332503 |
| 1  | 2.341109  | -1.131905 | -0.294019 |
| 1  | -2.333858 | 1.124842  | -0.397205 |
| 1  | -1.452257 | -2.232267 | 0.382400  |
| 8  | 0.054666  | 0.145453  | 1.990107  |
| 1  | -0.688112 | 0.479786  | 2.514965  |
| 1  | 0.566022  | -0.455139 | 2.553235  |
| 8  | 1.389872  | 1.396382  | -0.203344 |
| 1  | 1.462335  | 2.118833  | 0.438651  |

|   |           |           |           |
|---|-----------|-----------|-----------|
| 1 | 2.305030  | 1.140545  | -0.452159 |
| 8 | -3.723203 | -0.025966 | -0.746079 |
| 1 | -4.503060 | 0.016297  | -0.168904 |
| 1 | -4.085086 | -0.077419 | -1.645931 |
| 8 | 3.703522  | -0.025857 | -0.780349 |
| 1 | 4.489651  | 0.005847  | -0.211003 |
| 1 | 4.056085  | -0.059638 | -1.684676 |

-----

Cartesian coordinates of : 430-1.log

-----

Atomic number (AN) and Cartesian coordinates

| AN | X         | Y         | Z         |
|----|-----------|-----------|-----------|
| 8  | -1.695662 | -1.518497 | -0.543364 |
| 1  | -1.898959 | -2.234989 | -1.163355 |
| 26 | -0.061912 | -0.407370 | -0.503798 |
| 8  | 1.539882  | 0.696583  | -0.706235 |
| 1  | 2.399844  | 0.366300  | -0.373360 |
| 8  | -1.038496 | 1.021629  | 0.338657  |
| 1  | -0.668803 | 1.924247  | 0.445667  |
| 1  | -2.539377 | -1.152971 | -0.189775 |
| 1  | 1.476519  | 1.657752  | -0.520996 |
| 1  | -1.975579 | 0.962199  | 0.617629  |
| 8  | 0.872103  | -1.651247 | 0.635418  |
| 1  | 1.829598  | -1.554327 | 0.847872  |
| 1  | 0.472974  | -2.358869 | 1.161930  |
| 8  | -3.596970 | 0.029241  | 0.672570  |
| 1  | -3.960106 | -0.233862 | 1.533981  |
| 1  | -4.352569 | 0.401939  | 0.189386  |
| 8  | 3.472185  | -0.881014 | 0.598250  |
| 1  | 4.105080  | -1.411375 | 0.086648  |
| 1  | 3.976525  | -0.572888 | 1.368508  |
| 8  | 0.613001  | 3.205583  | 0.104289  |
| 1  | 0.420892  | 3.891064  | -0.556263 |
| 1  | 0.995327  | 3.689177  | 0.854205  |

-----

Cartesian coordinates of : 430-2.log

-----

Atomic number (AN) and Cartesian coordinates

| AN | X         | Y         | Z         |
|----|-----------|-----------|-----------|
| 1  | -2.022335 | 1.515550  | -1.908257 |
| 1  | -2.398805 | 1.195191  | -0.394209 |
| 1  | -1.373822 | 0.255241  | 1.476971  |
| 1  | -0.281247 | -0.910613 | 1.501041  |
| 26 | 0.032530  | 0.292975  | -0.678110 |
| 1  | 2.421303  | -0.669032 | -0.962588 |
| 1  | 2.557754  | 0.528432  | 0.100341  |
| 1  | 3.808134  | 1.461860  | 1.721060  |
| 1  | 4.050215  | 2.195853  | 0.381090  |
| 1  | -3.123601 | 1.996176  | 1.759331  |
| 1  | -3.869952 | 0.693216  | 1.429631  |

|   |           |           |           |
|---|-----------|-----------|-----------|
| 1 | -0.926949 | -1.788938 | -1.935196 |
| 1 | -0.119660 | -2.210735 | -0.636042 |
| 1 | 0.986035  | -3.126335 | 1.342450  |
| 1 | -0.505629 | -3.467348 | 1.419898  |
| 8 | -1.750153 | 1.026214  | -1.117495 |
| 8 | -3.031907 | 1.158903  | 1.275419  |
| 8 | 1.915041  | -0.098941 | -0.364943 |
| 8 | 3.449675  | 1.583830  | 0.830451  |
| 8 | -0.486026 | -0.015428 | 1.162555  |
| 8 | -0.212454 | -1.523786 | -1.336124 |
| 8 | 0.109922  | -2.791526 | 1.092053  |

-----

Cartesian coordinates of : 430-3.log

-----

Atomic number (AN) and Cartesian coordinates

| AN | X         | Y         | Z         |
|----|-----------|-----------|-----------|
| 1  | 2.333170  | 0.767953  | -0.072194 |
| 1  | 1.153134  | 1.891372  | -0.084176 |
| 1  | 1.320211  | -2.608234 | 0.505583  |
| 1  | 2.366850  | -1.470713 | 0.109049  |
| 1  | -2.333142 | 0.767906  | 0.072203  |
| 1  | -1.153071 | 1.891328  | 0.084035  |
| 26 | 0.000008  | -0.401916 | -0.000003 |
| 1  | -1.320183 | -2.608243 | -0.505612 |
| 1  | -2.366832 | -1.470718 | -0.109048 |
| 1  | 4.328122  | -0.505660 | -0.826119 |
| 1  | 4.396816  | -0.370050 | 0.707726  |
| 1  | -4.396789 | -0.370138 | -0.707705 |
| 1  | -4.328075 | -0.505772 | 0.826137  |
| 8  | 1.366959  | 0.932601  | -0.072187 |
| 8  | 3.772022  | -0.417830 | -0.034475 |
| 8  | 1.409527  | -1.715360 | 0.141000  |
| 8  | -1.409507 | -1.715378 | -0.141009 |
| 8  | -1.366934 | 0.932555  | 0.072204  |
| 8  | -3.771986 | -0.417907 | 0.034489  |
| 8  | -0.000093 | 3.306770  | -0.000010 |
| 1  | 0.056817  | 3.898514  | 0.767998  |
| 1  | -0.057161 | 3.898661  | -0.767893 |

-----

Cartesian coordinates of : 340-1.log

-----

Atomic number (AN) and Cartesian coordinates

| AN | X         | Y         | Z         |
|----|-----------|-----------|-----------|
| 1  | 2.223076  | -0.385293 | 0.376063  |
| 1  | 2.192805  | 1.259913  | 0.208935  |
| 1  | -0.808129 | -2.221425 | -0.065702 |
| 1  | 0.808273  | -2.221395 | -0.065766 |
| 1  | -2.223017 | -0.385403 | 0.376121  |
| 1  | -2.192870 | 1.259798  | 0.208921  |
| 26 | -0.000001 | 0.098399  | -0.699364 |

|   |           |           |           |
|---|-----------|-----------|-----------|
| 1 | 2.714896  | -2.570450 | 1.451532  |
| 1 | 3.201195  | -2.624164 | -0.006057 |
| 8 | 2.530171  | -2.217148 | 0.566312  |
| 8 | 1.711024  | 0.379420  | 0.034973  |
| 8 | 0.000049  | -1.798555 | -0.433905 |
| 8 | -1.711018 | 0.379336  | 0.035008  |
| 8 | -2.829887 | 2.635206  | 0.379505  |
| 1 | -3.513232 | 2.984836  | -0.210628 |
| 1 | -2.938692 | 3.091952  | 1.225799  |
| 8 | -2.530034 | -2.217260 | 0.566401  |
| 1 | -3.201029 | -2.624290 | -0.005990 |
| 1 | -2.714765 | -2.570581 | 1.451612  |
| 8 | 2.829701  | 2.635370  | 0.379605  |
| 1 | 2.938399  | 3.092129  | 1.225905  |
| 1 | 3.513059  | 2.985055  | -0.210478 |

-----

Cartesian coordinates of : 331.log

-----

Atomic number (AN) and Cartesian coordinates

| AN | X         | Y         | Z         |
|----|-----------|-----------|-----------|
| 1  | -2.485070 | 0.812902  | 0.156315  |
| 1  | -2.485012 | -0.812991 | 0.156330  |
| 1  | 1.108333  | -1.195076 | 0.587646  |
| 1  | -0.253388 | -2.081040 | 0.419013  |
| 1  | 1.108273  | 1.195074  | 0.587761  |
| 1  | -0.253487 | 2.080999  | 0.419157  |
| 26 | -0.401370 | 0.000027  | -0.982424 |
| 1  | -2.360916 | 2.768271  | 1.659704  |
| 1  | -2.496967 | 3.280118  | 0.222953  |
| 1  | -2.496947 | -3.280155 | 0.222994  |
| 1  | -2.360771 | -2.768320 | 1.659740  |
| 1  | 3.118269  | 0.000006  | 0.740580  |
| 1  | 2.444557  | -0.000058 | 2.158376  |
| 1  | 5.024755  | -0.770821 | -0.327867 |
| 1  | 5.024737  | 0.770919  | -0.327836 |
| 8  | 0.357984  | -1.448111 | -0.012939 |
| 8  | 2.234442  | -0.000018 | 1.211347  |
| 8  | 0.357913  | 1.448103  | -0.012807 |
| 8  | -2.122143 | 2.550355  | 0.743843  |
| 8  | -2.182304 | -0.000037 | -0.308448 |
| 8  | -2.122075 | -2.550401 | 0.743860  |
| 8  | 4.451088  | 0.000040  | -0.213836 |

-----

Cartesian coordinates of the octamer : [Fe(H<sub>2</sub>O)<sub>8</sub>]<sup>2+</sup>

Cartesian coordinates of : 620-1.log

-----

Atomic number (AN) and Cartesian coordinates

| AN | X | Y | Z |
|----|---|---|---|
|----|---|---|---|

-----

---

|    |           |           |           |
|----|-----------|-----------|-----------|
| 1  | 0.423863  | -1.575300 | -1.764999 |
| 1  | 1.759452  | -1.392409 | -0.937713 |
| 1  | 2.400847  | -0.204075 | 0.980584  |
| 1  | 1.816694  | 0.977485  | 1.853584  |
| 1  | -1.219837 | 1.515300  | 2.002187  |
| 1  | -1.214780 | 2.590918  | 0.881900  |
| 1  | -1.759500 | -1.392318 | 0.937805  |
| 1  | -0.423915 | -1.575155 | 1.765108  |
| 26 | -0.000003 | 0.361254  | -0.000004 |
| 1  | -1.816689 | 0.977434  | -1.853621 |
| 1  | -2.400858 | -0.204075 | -0.980565 |
| 1  | 1.219912  | 1.515066  | -2.002249 |
| 1  | 1.214902  | 2.590788  | -0.882060 |
| 1  | 4.179370  | -1.239521 | -0.449551 |
| 1  | 3.610728  | -2.300073 | 0.502098  |
| 1  | -4.179390 | -1.239482 | 0.449572  |
| 1  | -3.610745 | -2.300073 | -0.502034 |
| 8  | 3.370517  | -1.490115 | 0.024542  |
| 8  | 0.754627  | 1.799993  | -1.200535 |
| 8  | -0.916072 | -0.966838 | 1.196225  |
| 8  | 0.916018  | -0.966951 | -1.196150 |
| 8  | 1.583544  | 0.273391  | 1.232070  |
| 8  | -0.754552 | 1.800118  | 1.200435  |
| 8  | -3.370533 | -1.490101 | -0.024501 |
| 8  | -1.583547 | 0.273363  | -1.232079 |

---

Cartesian coordinates of : 620-2.log

---

Atomic number (AN) and Cartesian coordinates

| AN | X         | Y         | Z         |
|----|-----------|-----------|-----------|
| 1  | 2.513181  | -0.238406 | -0.056079 |
| 1  | 2.520364  | 1.331583  | -0.255380 |
| 1  | 0.903903  | 0.483748  | 2.461712  |
| 1  | -0.616013 | 0.181202  | 2.604348  |
| 1  | -2.484305 | -0.491318 | 0.057835  |
| 1  | -2.626686 | 1.079586  | 0.245610  |
| 1  | -0.689812 | -2.053738 | -0.031891 |
| 1  | 0.909582  | -1.975069 | -0.034319 |
| 26 | -0.026529 | 0.518010  | -0.003458 |
| 1  | 0.536502  | 0.330032  | -2.598016 |
| 1  | -0.968682 | 0.662778  | -2.429918 |
| 1  | -0.078394 | 3.046224  | 0.898434  |
| 1  | -0.119339 | 3.117347  | -0.667214 |
| 1  | 3.254395  | -2.466869 | -0.819088 |
| 1  | 3.334448  | -2.408069 | 0.711253  |
| 1  | -3.011940 | -2.758456 | -0.696944 |
| 1  | -2.980118 | -2.799299 | 0.835573  |
| 8  | -0.199903 | 2.522912  | 0.092970  |
| 8  | 1.982784  | 0.582254  | 0.037025  |
| 8  | 0.047930  | 0.567808  | 2.015605  |
| 8  | 0.083347  | -1.471855 | -0.155824 |
| 8  | 2.844919  | -2.048213 | -0.045332 |
| 8  | -0.101798 | 0.752658  | -2.004823 |



|   |           |           |           |
|---|-----------|-----------|-----------|
| 8 | -2.593604 | -2.340911 | 0.072786  |
| 8 | -2.027093 | 0.371655  | -0.029406 |

-----

Cartesian coordinates of : 620-3.log

-----

Atomic number (AN) and Cartesian coordinates

| AN | X         | Y         | Z         |
|----|-----------|-----------|-----------|
| 1  | 0.684457  | 2.615366  | 0.728820  |
| 1  | -0.544367 | 2.726091  | -0.237734 |
| 1  | -1.485896 | 0.681524  | 2.137409  |
| 1  | -2.318067 | -0.212953 | 1.160707  |
| 1  | -0.214109 | -2.482107 | 0.607811  |
| 1  | 0.180289  | -2.381946 | -0.897770 |
| 1  | 1.291901  | -0.314337 | 2.306503  |
| 1  | 2.350374  | -0.216053 | 1.148350  |
| 26 | -0.000803 | 0.120879  | 0.009358  |
| 1  | 2.315606  | -0.165188 | -1.165531 |
| 1  | 1.482931  | 0.831407  | -2.024896 |
| 1  | -2.336626 | 0.058134  | -1.133781 |
| 1  | -1.306576 | 0.180528  | -2.306281 |
| 8  | 1.400991  | 0.068243  | -1.433085 |
| 8  | 1.439601  | 0.031569  | 1.414572  |
| 8  | -0.187574 | -1.883976 | -0.152997 |
| 8  | -1.405264 | 0.009513  | 1.445065  |
| 8  | -1.442079 | 0.384980  | -1.369460 |
| 8  | 0.140484  | 2.127384  | 0.093912  |
| 8  | 3.760982  | -0.509730 | -0.027791 |
| 1  | 4.486858  | 0.134454  | -0.002029 |
| 1  | 4.203912  | -1.371790 | -0.077692 |
| 8  | -3.728040 | -0.474369 | -0.021644 |
| 1  | -4.101829 | -1.365966 | -0.104870 |
| 1  | -4.500769 | 0.111062  | 0.029095  |

-----

Cartesian coordinates of : 620-4.log

-----

Atomic number (AN) and Cartesian coordinates

| AN | X         | Y         | Z         |
|----|-----------|-----------|-----------|
| 1  | -1.819717 | 0.677399  | 0.793001  |
| 1  | -1.707309 | -0.886217 | 0.899246  |
| 1  | 0.563317  | 1.755096  | 2.030869  |
| 1  | 1.643410  | 2.261501  | 1.026491  |
| 1  | -0.932557 | 1.902263  | -1.033250 |
| 1  | -0.368626 | 1.057249  | -2.217943 |
| 1  | -2.485121 | 3.146263  | 0.501601  |
| 1  | -3.308847 | 2.298601  | -0.469156 |
| 26 | 0.550799  | 0.029972  | -0.013831 |
| 1  | -3.068071 | -2.608233 | -0.414920 |
| 1  | -2.223410 | -3.380050 | 0.601631  |
| 1  | 1.696460  | -0.956087 | 2.164379  |
| 1  | 1.351988  | -2.198719 | 1.295521  |

|   |           |           |           |
|---|-----------|-----------|-----------|
| 8 | -2.223947 | -2.573266 | 0.062585  |
| 8 | -2.454985 | 2.321438  | -0.008400 |
| 8 | -0.163700 | 1.367798  | -1.323046 |
| 8 | 1.099281  | 1.497007  | 1.266515  |
| 8 | 1.475504  | -1.239343 | 1.264343  |
| 8 | -1.195385 | -0.056102 | 0.962215  |
| 8 | -0.001516 | -1.478675 | -1.212325 |
| 1 | -0.743806 | -2.067962 | -0.964654 |
| 1 | 0.608382  | -1.962484 | -1.787392 |
| 8 | 2.312428  | 0.111976  | -0.992871 |
| 1 | 2.563664  | 0.804257  | -1.622239 |
| 1 | 3.128020  | -0.228802 | -0.595699 |

-----

Cartesian coordinates of : 611-1.log

-----

Atomic number (AN) and Cartesian coordinates

| AN | X         | Y         | Z         |
|----|-----------|-----------|-----------|
| 1  | 0.864862  | -2.559994 | 0.323274  |
| 1  | 1.569307  | -2.322218 | -1.039612 |
| 1  | 2.833985  | -0.608398 | 1.706018  |
| 1  | 2.466594  | 0.886637  | 1.990134  |
| 1  | -0.294299 | 2.355415  | 0.660820  |
| 1  | 0.958153  | 2.685553  | -0.205838 |
| 1  | -0.472511 | -0.387487 | 2.300442  |
| 1  | -1.415618 | -0.725901 | 1.056774  |
| 26 | 0.879099  | 0.038339  | -0.004282 |
| 1  | -0.689353 | 0.580220  | -2.074641 |
| 1  | -1.399499 | -0.472877 | -1.152414 |
| 1  | 3.184801  | 0.631097  | -1.129132 |
| 1  | 2.218144  | 0.414492  | -2.329055 |
| 8  | -0.517943 | -0.122788 | -1.432140 |
| 8  | -0.491186 | -0.525455 | 1.343957  |
| 8  | 0.547500  | 1.998773  | 0.341416  |
| 8  | 2.366281  | 0.163469  | 1.353386  |
| 8  | 2.248096  | 0.606266  | -1.379784 |
| 8  | 1.369396  | -1.907956 | -0.186696 |
| 8  | -2.703791 | -1.009408 | -0.093640 |
| 1  | -3.057977 | -1.905268 | -0.201525 |
| 1  | -3.500624 | -0.414566 | -0.038154 |
| 8  | -4.754130 | 0.690691  | 0.064095  |
| 1  | -5.319879 | 0.918595  | -0.686738 |
| 1  | -5.316461 | 0.779145  | 0.846226  |

-----

Cartesian coordinates of : 530-1.log

-----

Atomic number (AN) and Cartesian coordinates

| AN | X         | Y         | Z         |
|----|-----------|-----------|-----------|
| 8  | -1.353325 | 0.838685  | -1.028984 |
| 1  | -1.147013 | 1.141025  | -1.926100 |
| 26 | -0.100952 | -0.378862 | -0.066320 |

---

|   |           |           |           |
|---|-----------|-----------|-----------|
| 8 | 1.199075  | -1.712858 | 0.650834  |
| 1 | 0.992396  | -2.645207 | 0.811592  |
| 8 | 1.372835  | 0.632143  | -0.929687 |
| 1 | 2.271866  | 0.248534  | -0.968654 |
| 1 | -2.322636 | 0.695052  | -0.971830 |
| 1 | 2.128112  | -1.669396 | 0.329401  |
| 1 | 1.451287  | 1.570531  | -0.661788 |
| 8 | -0.127378 | 0.778714  | 1.526149  |
| 1 | 0.227730  | 0.469132  | 2.372253  |
| 1 | 0.200255  | 1.692372  | 1.383319  |
| 8 | -1.642247 | -1.505938 | 0.495567  |
| 1 | -1.695092 | -2.011909 | 1.318805  |
| 1 | -2.549685 | -1.186589 | 0.293015  |
| 8 | 3.583726  | -1.086273 | -0.585117 |
| 1 | 4.380112  | -0.865320 | -0.076328 |
| 1 | 3.910627  | -1.601612 | -1.340130 |
| 8 | -3.869310 | -0.158586 | -0.425655 |
| 1 | -4.470985 | 0.326979  | 0.161211  |
| 1 | -4.446881 | -0.575605 | -1.085347 |
| 8 | 1.024380  | 3.079596  | 0.438822  |
| 1 | 1.751143  | 3.566244  | 0.859462  |
| 1 | 0.441485  | 3.772340  | 0.090017  |

---

Cartesian coordinates of : 440-1.log

---

Atomic number (AN) and Cartesian coordinates

| AN | X         | Y         | Z         |
|----|-----------|-----------|-----------|
| 8  | -1.956962 | -0.000128 | -0.582383 |
| 1  | -2.456488 | -0.798358 | -0.313938 |
| 26 | -0.000003 | 0.000004  | -0.455919 |
| 8  | 1.956956  | 0.000129  | -0.582363 |
| 1  | 2.456591  | -0.798026 | -0.313901 |
| 8  | -0.000125 | 1.758095  | 0.323587  |
| 1  | 0.816792  | 2.271509  | 0.503083  |
| 1  | -2.456616 | 0.798006  | -0.313895 |
| 1  | 2.456486  | 0.798344  | -0.313880 |
| 1  | -0.817104 | 2.271406  | 0.503103  |
| 8  | 0.000126  | -1.758071 | 0.323616  |
| 1  | 0.817110  | -2.271386 | 0.503095  |
| 1  | -0.816787 | -2.271503 | 0.503093  |
| 8  | -2.623016 | 2.557505  | 0.362726  |
| 1  | -3.135914 | 2.713921  | 1.171561  |
| 1  | -2.939022 | 3.228385  | -0.263799 |
| 8  | 2.623001  | -2.557515 | 0.362704  |
| 1  | 2.939021  | -3.228409 | -0.263798 |
| 1  | 3.135871  | -2.713920 | 1.171560  |
| 8  | 2.622651  | 2.557852  | 0.362693  |
| 1  | 2.938583  | 3.228763  | -0.263835 |
| 1  | 3.135518  | 2.714338  | 1.171535  |
| 8  | -2.622621 | -2.557870 | 0.362691  |
| 1  | -2.938542 | -3.228823 | -0.263799 |
| 1  | -3.135491 | -2.714315 | 1.171538  |

---

Cartesian coordinates of : 440-2.log

-----  
Atomic number (AN) and Cartesian coordinates

| AN | X         | Y         | Z         |
|----|-----------|-----------|-----------|
| 1  | 2.652534  | -0.707479 | -0.179466 |
| 1  | 2.197449  | 0.501210  | 0.809315  |
| 1  | 0.180307  | 1.507421  | 1.494438  |
| 1  | -1.161299 | 1.673475  | 0.640747  |
| 26 | 0.003464  | -0.367771 | -0.241527 |
| 1  | -2.179955 | -1.229953 | -1.361630 |
| 1  | -2.344604 | -1.522944 | 0.203380  |
| 1  | -3.750727 | -2.003263 | 1.920308  |
| 1  | -3.127343 | -3.310615 | 1.380206  |
| 1  | 2.013436  | 1.564346  | 3.087700  |
| 1  | 2.301114  | 2.673012  | 2.064347  |
| 1  | 0.610346  | 0.959940  | -2.388624 |
| 1  | -0.808812 | 1.391470  | -1.832834 |
| 1  | -2.943514 | 2.324897  | -1.095822 |
| 1  | -1.904731 | 3.451385  | -1.090633 |
| 8  | 1.900962  | -0.110805 | 0.107886  |
| 8  | 1.872359  | 1.807816  | 2.158796  |
| 8  | -1.838373 | -0.993128 | -0.486977 |
| 8  | -3.034131 | -2.347461 | 1.368912  |
| 8  | -0.518328 | 1.029369  | 0.996627  |
| 8  | -0.164666 | 0.649649  | -1.896632 |
| 8  | -1.997436 | 2.493750  | -0.961478 |
| 8  | 3.739367  | -1.740601 | -0.749389 |
| 1  | 4.087377  | -2.501578 | -0.263736 |
| 1  | 4.410343  | -1.517991 | -1.409944 |

-----

Cartesian coordinates of : 440-3.log

-----  
Atomic number (AN) and Cartesian coordinates

| AN | X         | Y         | Z         |
|----|-----------|-----------|-----------|
| 1  | 2.337114  | -1.150757 | -0.000030 |
| 1  | 1.170677  | -2.291212 | -0.000022 |
| 1  | 1.170839  | 2.291113  | 0.000003  |
| 1  | 2.337199  | 1.150572  | -0.000018 |
| 1  | -2.337197 | -1.150592 | -0.000001 |
| 1  | -1.170822 | -2.291117 | 0.000004  |
| 26 | 0.000001  | -0.000003 | 0.000002  |
| 1  | -1.170653 | 2.291206  | 0.000012  |
| 1  | -2.337105 | 1.150759  | 0.000024  |
| 1  | 4.370074  | -0.000162 | 0.769901  |
| 1  | 4.370100  | -0.000174 | -0.769892 |
| 1  | -4.370120 | 0.000185  | 0.769830  |
| 1  | -4.370036 | 0.000195  | -0.769963 |
| 8  | 1.373445  | -1.331972 | -0.000048 |
| 8  | 3.778899  | -0.000143 | -0.000005 |
| 8  | 1.373544  | 1.331859  | -0.000002 |

|   |           |           |           |
|---|-----------|-----------|-----------|
| 8 | -1.373434 | 1.331967  | 0.000040  |
| 8 | -1.373540 | -1.331865 | 0.000022  |
| 8 | -3.778891 | 0.000160  | -0.000034 |
| 8 | -0.000172 | -3.718032 | 0.000022  |
| 1 | -0.000208 | -4.309534 | -0.769704 |
| 1 | -0.000185 | -4.309481 | 0.769789  |
| 8 | 0.000143  | 3.718032  | 0.000006  |
| 1 | 0.000176  | 4.309517  | 0.769746  |
| 1 | 0.000166  | 4.309500  | -0.769746 |

-----

Cartesian coordinates of : 332.log

-----

Atomic number (AN) and Cartesian coordinates

| AN | X         | Y         | Z         |
|----|-----------|-----------|-----------|
| 1  | 2.040735  | 0.725517  | 0.409064  |
| 1  | 1.288954  | 2.155277  | 0.172184  |
| 1  | -2.040735 | 0.725546  | 0.409239  |
| 1  | -1.288908 | 2.155287  | 0.172362  |
| 1  | -0.818123 | -1.317576 | 0.741117  |
| 1  | 0.818142  | -1.317555 | 0.741074  |
| 26 | -0.000062 | 0.315587  | -0.938783 |
| 1  | 2.756109  | -0.769993 | 2.102374  |
| 1  | 3.207276  | -1.265340 | 0.685258  |
| 1  | -0.000007 | 4.305765  | -0.058461 |
| 1  | 0.000118  | 3.915355  | 1.422193  |
| 1  | -3.207247 | -1.265370 | 0.685303  |
| 1  | -2.756096 | -0.770110 | 2.102455  |
| 1  | -5.148911 | -1.674247 | -0.536851 |
| 1  | -4.394934 | -3.000882 | -0.318558 |
| 8  | -1.472099 | 1.266939  | -0.201604 |
| 8  | -2.486363 | -0.772981 | 1.171056  |
| 8  | -0.000007 | -1.207431 | 0.196218  |
| 8  | 2.486376  | -0.772939 | 1.170975  |
| 8  | 1.472080  | 1.266909  | -0.201766 |
| 8  | 0.000044  | 3.532792  | 0.529860  |
| 8  | -4.285393 | -2.039891 | -0.298970 |
| 8  | 4.285506  | -2.039879 | -0.298910 |
| 1  | 5.149023  | -1.674224 | -0.536777 |
| 1  | 4.395062  | -3.000869 | -0.318478 |

-----

Cartesian coordinates of : 350.log

-----

Atomic number (AN) and Cartesian coordinates

| AN | X         | Y         | Z         |
|----|-----------|-----------|-----------|
| 8  | -0.000013 | 1.500326  | -1.440475 |
| 1  | -0.000039 | 2.511346  | -1.197663 |
| 26 | 0.000002  | 0.109122  | -0.325995 |
| 8  | -1.518602 | -0.579219 | 0.225318  |
| 1  | -2.005263 | -1.329397 | -0.263144 |
| 8  | 1.518615  | -0.579180 | 0.225337  |

---

|   |           |           |           |
|---|-----------|-----------|-----------|
| 1 | 2.013299  | -0.277084 | 1.062854  |
| 1 | -0.000003 | 1.370445  | -2.403817 |
| 1 | -2.013305 | -0.277140 | 1.062833  |
| 1 | 2.005313  | -1.329333 | -0.263119 |
| 8 | 2.726191  | -2.448862 | -1.023535 |
| 1 | 3.473090  | -2.317472 | -1.624173 |
| 1 | 2.749765  | -3.377213 | -0.752964 |
| 8 | -2.755382 | 0.188334  | 2.323232  |
| 1 | -3.550396 | 0.739419  | 2.320215  |
| 1 | -2.746405 | -0.276862 | 3.171261  |
| 8 | -0.000075 | 3.924793  | -0.850463 |
| 1 | -0.778680 | 4.496481  | -0.911889 |
| 1 | 0.778499  | 4.496525  | -0.911896 |
| 8 | 2.755329  | 0.188430  | 2.323263  |
| 1 | 2.746399  | -0.276786 | 3.171281  |
| 1 | 3.550276  | 0.739612  | 2.320271  |
| 8 | -2.726069 | -2.448969 | -1.023552 |
| 1 | -3.472956 | -2.317624 | -1.624215 |
| 1 | -2.749614 | -3.377313 | -0.752955 |

---

Cartesian coordinates of the nanomer :  $[\text{Fe}(\text{H}_2\text{O})_9]^{2+}$

Cartesian coordinates of : 630-1.log

---

Atomic number (AN) and Cartesian coordinates

| AN | X         | Y         | Z         |
|----|-----------|-----------|-----------|
| 1  | 0.778941  | -2.594664 | 0.324223  |
| 1  | -0.727944 | -2.486296 | -0.145230 |
| 1  | -2.243668 | -0.733030 | -0.654283 |
| 1  | -2.183326 | 0.866166  | -0.675382 |
| 1  | -0.645703 | 2.480946  | 0.047603  |
| 1  | 0.862796  | 2.523777  | 0.474191  |
| 1  | 1.925491  | 0.007844  | -1.654179 |
| 1  | 0.494960  | -0.110433 | -2.312937 |
| 26 | 0.127065  | -0.009441 | 0.303334  |
| 1  | 2.177885  | -0.021724 | 2.010463  |
| 1  | 2.798000  | -0.051418 | 0.546455  |
| 1  | -0.937648 | -0.888243 | 2.585215  |
| 1  | -0.957305 | 0.676048  | 2.632896  |
| 1  | -3.114794 | -3.111201 | -0.218300 |
| 1  | -2.651612 | -2.992668 | -1.675502 |
| 1  | 4.287195  | 0.733949  | -1.318124 |
| 1  | 4.307730  | -0.799015 | -1.273031 |
| 8  | -2.484321 | -2.642022 | -0.786804 |
| 8  | -0.552648 | -0.088759 | 2.199096  |
| 8  | 0.969396  | 0.153140  | -1.513208 |
| 8  | 0.002992  | -2.018342 | 0.307229  |
| 8  | -1.659048 | 0.046073  | -0.603600 |
| 8  | 0.057149  | 1.990750  | 0.523423  |
| 8  | 3.743921  | -0.033635 | -1.079979 |
| 8  | 1.977301  | -0.134565 | 1.071301  |
| 8  | -2.319766 | 2.768064  | -0.718270 |

---

|   |           |          |           |
|---|-----------|----------|-----------|
| 1 | -2.381154 | 3.178948 | -1.594725 |
| 1 | -2.973340 | 3.240861 | -0.179524 |

---

Cartesian coordinates of : 630-2.log

---

Atomic number (AN) and Cartesian coordinates

| AN | X         | Y         | Z         |
|----|-----------|-----------|-----------|
| 1  | -0.263499 | 0.316133  | 2.625531  |
| 1  | 0.948658  | -0.671510 | 2.561269  |
| 1  | 1.200749  | 2.007605  | -0.088031 |
| 1  | 2.332770  | 0.882154  | -0.200702 |
| 1  | 0.221856  | 0.155750  | -2.489206 |
| 1  | -0.494202 | -1.221147 | -2.381765 |
| 1  | -1.171517 | 2.013176  | 0.135388  |
| 1  | -2.296648 | 0.893970  | 0.005208  |
| 26 | -0.007904 | -0.340149 | 0.073442  |
| 1  | -2.328193 | -1.483970 | 0.026399  |
| 1  | -1.440600 | -2.300337 | 1.021478  |
| 1  | 2.359476  | -1.494730 | -0.169156 |
| 1  | 1.295711  | -2.655788 | -0.255950 |
| 8  | -1.408103 | -1.772679 | 0.209538  |
| 8  | -1.393656 | 1.081368  | 0.326883  |
| 8  | -0.342825 | -0.384848 | -1.917210 |
| 8  | 1.378115  | 1.066265  | -0.280991 |
| 8  | 1.436060  | -1.746132 | 0.041905  |
| 8  | 0.169687  | -0.357097 | 2.081363  |
| 8  | -3.741272 | -0.329092 | -0.333481 |
| 1  | -4.482092 | -0.305945 | 0.292654  |
| 1  | -4.160985 | -0.372035 | -1.206720 |
| 8  | 3.819206  | -0.351301 | -0.307950 |
| 1  | 4.334311  | -0.328786 | -1.129675 |
| 1  | 4.486247  | -0.403033 | 0.394515  |
| 8  | 0.033421  | 3.497269  | 0.038768  |
| 1  | 0.049150  | 4.090561  | 0.805842  |
| 1  | 0.009241  | 4.091793  | -0.727181 |

---

Cartesian coordinates of : 621-1.log

---

Atomic number (AN) and Cartesian coordinates

| AN | X         | Y         | Z         |
|----|-----------|-----------|-----------|
| 1  | -1.927500 | -2.288123 | -0.900172 |
| 1  | -2.743636 | -1.864317 | 0.364792  |
| 1  | -2.988853 | 0.765680  | -1.616028 |
| 1  | -1.992132 | 1.966940  | -1.506080 |
| 1  | 1.004424  | 1.892438  | -0.145187 |
| 1  | 0.004864  | 2.344153  | 0.972362  |
| 1  | 0.056841  | -0.354804 | -2.402092 |
| 1  | 0.932911  | -1.188460 | -1.354586 |
| 26 | -0.916557 | 0.070777  | 0.012310  |
| 1  | 1.208639  | -0.603979 | 1.363543  |

|   |           |           |           |
|---|-----------|-----------|-----------|
| 1 | 0.229309  | -1.807623 | 1.306073  |
| 1 | -2.825290 | 1.162252  | 1.640717  |
| 1 | -1.812123 | 0.313613  | 2.479901  |
| 8 | 0.248555  | -0.838475 | 1.347507  |
| 8 | 0.316614  | -0.416509 | -1.472664 |
| 8 | 0.078389  | 1.802655  | 0.173874  |
| 8 | -2.106891 | 1.024665  | -1.313795 |
| 8 | -2.119736 | 0.502485  | 1.580175  |
| 8 | -1.971904 | -1.646087 | -0.177823 |
| 8 | 1.926766  | -2.364659 | -0.713246 |
| 1 | 2.265355  | -3.151695 | -1.163461 |
| 1 | 2.671144  | -1.973682 | -0.225411 |
| 8 | 2.919827  | -0.357012 | 1.077642  |
| 1 | 3.563301  | -0.462427 | 1.794373  |
| 1 | 3.148163  | 0.473801  | 0.621041  |
| 8 | 2.799218  | 2.056495  | -0.493042 |
| 1 | 3.235167  | 2.873010  | -0.201142 |
| 1 | 3.073190  | 1.954570  | -1.417743 |

-----

Cartesian coordinates of : 540-1.log

-----

Atomic number (AN) and Cartesian coordinates

| AN | X         | Y         | Z         |
|----|-----------|-----------|-----------|
| 1  | 2.485751  | -0.816789 | -0.231230 |
| 1  | 2.488554  | 0.793375  | -0.202048 |
| 1  | -0.803751 | -2.502524 | -0.144088 |
| 1  | 0.802770  | -2.502851 | -0.144007 |
| 1  | -0.804022 | 2.465321  | -0.346137 |
| 1  | 0.805114  | 2.464948  | -0.346242 |
| 26 | 0.000000  | -0.004147 | 0.044202  |
| 1  | -2.486087 | -0.815747 | -0.231212 |
| 1  | -2.488203 | 0.794424  | -0.201941 |
| 1  | 2.961023  | -3.028609 | -1.322248 |
| 1  | 3.181014  | -3.170655 | 0.190887  |
| 1  | -3.065931 | 3.001609  | -1.218874 |
| 1  | -3.158831 | 3.123887  | 0.310081  |
| 8  | 1.981433  | -0.015613 | 0.012246  |
| 8  | 2.659951  | -2.684104 | -0.467008 |
| 8  | -0.000398 | -1.989200 | 0.070696  |
| 8  | -1.981418 | -0.014799 | 0.012282  |
| 8  | 0.000412  | 1.915389  | -0.407278 |
| 8  | -2.695342 | 2.646673  | -0.395714 |
| 8  | 2.696366  | 2.645657  | -0.395766 |
| 1  | 3.159963  | 3.122638  | 0.310116  |
| 1  | 3.067173  | 3.000520  | -1.218859 |
| 8  | -2.661061 | -2.683013 | -0.467065 |
| 1  | -2.962326 | -3.027389 | -1.322288 |
| 1  | -3.182258 | -3.169378 | 0.190860  |
| 8  | 0.000064  | 0.235978  | 2.006819  |
| 1  | 0.778897  | -0.040553 | 2.512137  |
| 1  | -0.778916 | -0.040152 | 2.512130  |

-----



Cartesian coordinates of : 540-2.log

-----  
Atomic number (AN) and Cartesian coordinates

| AN | X         | Y         | Z         |
|----|-----------|-----------|-----------|
| 1  | -1.971717 | 1.600378  | -0.322155 |
| 1  | -2.491089 | 0.185526  | -0.821401 |
| 1  | -1.716287 | -1.912580 | -0.000769 |
| 1  | -0.280263 | -2.514455 | 0.396568  |
| 1  | -0.539952 | 1.632396  | 1.619095  |
| 1  | -0.162205 | 0.273411  | 2.314341  |
| 26 | 0.040813  | 0.010116  | -0.251491 |
| 1  | 1.866073  | 1.751146  | -0.898204 |
| 1  | 0.616813  | 2.044333  | -1.818360 |
| 1  | 2.637388  | -0.313685 | -0.046024 |
| 1  | 1.950443  | -1.739599 | 0.258283  |
| 1  | -3.679288 | -1.855682 | -1.580188 |
| 1  | -4.175201 | -1.576323 | -0.154629 |
| 1  | -2.518000 | 3.164185  | 1.605608  |
| 1  | -1.380721 | 3.795119  | 0.792901  |
| 1  | 4.270966  | 1.258094  | -1.097094 |
| 1  | 3.989092  | 1.794937  | 0.315910  |
| 8  | 0.016435  | 0.828818  | 1.541884  |
| 8  | -1.712689 | 0.777015  | -0.781609 |
| 8  | -0.807290 | -1.697224 | 0.288292  |
| 8  | -3.401837 | -1.476217 | -0.731471 |
| 8  | 0.889831  | 1.670512  | -0.967730 |
| 8  | -1.758969 | 2.938411  | 1.045165  |
| 8  | 1.813927  | -0.836348 | -0.086855 |
| 8  | 3.585009  | 1.297171  | -0.411982 |
| 8  | 1.313060  | -3.477679 | 0.656942  |
| 1  | 1.558111  | -4.171583 | 0.024836  |
| 1  | 1.464869  | -3.874310 | 1.528980  |

-----  
Cartesian coordinates of : 441-1.log

-----  
Atomic number (AN) and Cartesian coordinates

| AN | X         | Y         | Z         |
|----|-----------|-----------|-----------|
| 8  | -0.876096 | 1.485807  | -0.388323 |
| 1  | -1.749611 | 1.309476  | 0.034421  |
| 26 | 0.421822  | 0.019504  | -0.398188 |
| 8  | 1.680691  | -1.464587 | -0.659036 |
| 1  | 1.435621  | -2.353876 | -0.329189 |
| 8  | 1.835191  | 1.182837  | 0.193470  |
| 1  | 2.772167  | 0.904955  | 0.272235  |
| 1  | -0.579366 | 2.386304  | -0.151964 |
| 1  | 2.635035  | -1.316411 | -0.502064 |
| 1  | 1.703392  | 2.135080  | 0.391843  |
| 8  | -0.793955 | -1.099910 | 0.573219  |
| 1  | -0.642964 | -2.048224 | 0.759185  |
| 1  | -1.694156 | -0.782633 | 0.839536  |
| 8  | 0.740155  | 3.681797  | 0.391369  |

|   |           |           |           |
|---|-----------|-----------|-----------|
| 1 | 0.622160  | 4.162229  | 1.225886  |
| 1 | 0.961378  | 4.366592  | -0.259727 |
| 8 | 0.342027  | -3.626143 | 0.510211  |
| 1 | -0.025819 | -4.316427 | -0.064169 |
| 1 | 0.666101  | -4.101279 | 1.291436  |
| 8 | 4.151379  | -0.280013 | -0.013563 |
| 1 | 4.785135  | -0.089823 | -0.723637 |
| 1 | 4.698418  | -0.554039 | 0.739396  |
| 8 | -3.000590 | 0.338799  | 0.872074  |
| 1 | -3.803637 | 0.123230  | 0.324801  |
| 1 | -3.341302 | 0.638959  | 1.727987  |
| 8 | -5.095145 | -0.262522 | -0.665217 |
| 1 | -5.565856 | 0.369995  | -1.224507 |
| 1 | -5.713324 | -0.989726 | -0.512206 |

-----

Cartesian coordinates of : 441-2.log

-----

Atomic number (AN) and Cartesian coordinates

| AN | X         | Y         | Z         |
|----|-----------|-----------|-----------|
| 1  | -0.684364 | -2.323848 | -0.302275 |
| 1  | -1.786113 | -1.118949 | -0.494310 |
| 1  | 2.734634  | -1.177157 | 0.285703  |
| 1  | 1.605414  | -2.338251 | 0.087292  |
| 1  | -0.684386 | 2.323844  | -0.302173 |
| 1  | -1.786130 | 1.118941  | -0.494219 |
| 26 | 0.475098  | -0.000001 | -0.092756 |
| 1  | 2.734618  | 1.177160  | 0.285779  |
| 1  | 1.605399  | 2.338250  | 0.087361  |
| 1  | 0.376720  | -4.383364 | 0.634222  |
| 1  | 0.633052  | -4.365127 | -0.883599 |
| 1  | 0.376722  | 4.383460  | 0.634066  |
| 1  | 0.633020  | 4.365029  | -0.883759 |
| 8  | -0.843179 | -1.359504 | -0.318422 |
| 8  | 0.497505  | -3.783485 | -0.118813 |
| 8  | 1.788332  | -1.375607 | 0.129388  |
| 8  | 1.788304  | 1.375608  | 0.129528  |
| 8  | -0.843209 | 1.359500  | -0.318267 |
| 8  | 0.497483  | 3.783485  | -0.118896 |
| 8  | -3.098943 | 0.000001  | -0.754117 |
| 1  | -3.522154 | 0.000018  | -1.626123 |
| 1  | -3.844848 | -0.000011 | -0.095058 |
| 8  | 4.148626  | 0.000018  | 0.522915  |
| 1  | 4.603486  | 0.000009  | 1.380221  |
| 1  | 4.859700  | 0.000036  | -0.137569 |
| 8  | -5.063704 | -0.000016 | 1.050256  |
| 1  | -5.588486 | 0.771025  | 1.303785  |
| 1  | -5.588536 | -0.771040 | 1.303730  |

-----

Cartesian coordinates of : 360.log

-----

Atomic number (AN) and Cartesian coordinates

| AN | X         | Y         | Z         |
|----|-----------|-----------|-----------|
| 8  | 0.705197  | -1.615514 | 0.000005  |
| 1  | 0.931588  | -2.133927 | -0.840438 |
| 26 | 0.000004  | -0.000006 | -0.000004 |
| 8  | -1.751670 | 0.197034  | 0.000021  |
| 1  | -2.313784 | 0.260384  | 0.840475  |
| 8  | 1.046479  | 1.418465  | -0.000034 |
| 1  | 1.382217  | 1.873730  | -0.840486 |
| 1  | 0.931430  | -2.133981 | 0.840455  |
| 1  | -2.313836 | 0.260155  | -0.840415 |
| 1  | 1.382399  | 1.873624  | 0.840403  |
| 8  | 1.896671  | 2.570166  | 2.133237  |
| 1  | 2.784928  | 2.469237  | 2.501836  |
| 1  | 1.537124  | 3.388011  | 2.503245  |
| 8  | -3.174286 | 0.356614  | -2.133232 |
| 1  | -3.704221 | -0.363367 | -2.501809 |
| 1  | -3.529553 | 1.176326  | -2.503244 |
| 8  | 1.278211  | -2.927319 | -2.133270 |
| 1  | 0.745942  | -3.644851 | -2.503257 |
| 1  | 2.166680  | -3.026244 | -2.501903 |
| 8  | 1.895972  | 2.570633  | -2.133326 |
| 1  | 1.537391  | 3.389528  | -2.501950 |
| 1  | 2.783501  | 2.468456  | -2.503330 |
| 8  | -3.174147 | 0.357491  | 2.133302  |
| 1  | -3.702644 | -0.362808 | 2.503318  |
| 1  | -3.530874 | 1.177212  | 2.501890  |
| 8  | 1.277564  | -2.927557 | 2.133308  |
| 1  | 2.165633  | -3.025093 | 2.503270  |
| 1  | 0.746047  | -3.646332 | 2.501961  |

Cartesian coordinates of the decamer :  $[\text{Fe}(\text{H}_2\text{O})_{10}]^{2+}$

Cartesian coordinates of : 640-1.log

| Atomic number (AN) and Cartesian coordinates |           |           |           |
|----------------------------------------------|-----------|-----------|-----------|
| AN                                           | X         | Y         | Z         |
| 1                                            | -0.284579 | -1.926712 | -1.896206 |
| 1                                            | 1.233496  | -1.956960 | -1.445141 |
| 1                                            | 2.568999  | -0.677824 | 0.053958  |
| 1                                            | 2.331416  | 0.700604  | 0.812776  |
| 1                                            | 0.434729  | 1.945820  | 1.506273  |
| 1                                            | -0.715785 | 1.126638  | 2.172894  |
| 1                                            | -1.233558 | -1.956990 | 1.445060  |
| 1                                            | 0.284543  | -1.926925 | 1.896052  |
| 26                                           | 0.000004  | -0.090168 | 0.000006  |
| 1                                            | -2.331422 | 0.700654  | -0.812743 |
| 1                                            | -2.569000 | -0.677810 | -0.053993 |
| 1                                            | -0.434740 | 1.945879  | -1.506178 |
| 1                                            | 0.715892  | 1.126806  | -2.172734 |
| 1                                            | 3.671740  | -2.013032 | -1.834343 |
| 1                                            | 3.429626  | -2.943661 | -0.639775 |
| 1                                            | -3.671809 | -2.012909 | 1.834289  |

|   |           |           |           |
|---|-----------|-----------|-----------|
| 1 | -3.429733 | -2.943614 | 0.639773  |
| 8 | 3.075540  | -2.157419 | -1.083216 |
| 8 | 0.350631  | 1.391134  | -1.315689 |
| 8 | -0.411220 | -1.428264 | 1.446879  |
| 8 | 0.411216  | -1.428143 | -1.446980 |
| 8 | 1.923583  | -0.150847 | 0.561774  |
| 8 | -0.350612 | 1.391020  | 1.315829  |
| 8 | -3.075610 | -2.157368 | 1.083175  |
| 8 | -1.923578 | -0.150798 | -0.561766 |
| 8 | 2.239117  | 2.475002  | 1.502890  |
| 1 | 2.687289  | 2.664871  | 2.341811  |
| 1 | 2.474758  | 3.214753  | 0.922414  |
| 8 | -2.239070 | 2.475064  | -1.502900 |
| 1 | -2.474747 | 3.214836  | -0.922465 |
| 1 | -2.687203 | 2.664894  | -2.341850 |

-----

Cartesian coordinates of : 640-2.log

-----

Atomic number (AN) and Cartesian coordinates

| AN | X         | Y         | Z         |
|----|-----------|-----------|-----------|
| 1  | 0.552877  | 0.002699  | -2.472283 |
| 1  | -0.993585 | -0.096161 | -2.434411 |
| 1  | -0.645759 | 2.564427  | -0.187665 |
| 1  | -2.013039 | 1.738753  | 0.005590  |
| 1  | -0.211410 | 0.887409  | 2.492645  |
| 1  | 0.316252  | -0.572243 | 2.539494  |
| 1  | 1.699048  | 1.951925  | -0.327337 |
| 1  | 2.529918  | 0.611610  | -0.105177 |
| 26 | 0.001843  | -0.008053 | 0.043068  |
| 1  | 1.995304  | -1.723215 | 0.144462  |
| 1  | 0.637714  | -2.534154 | -0.107895 |
| 1  | -2.554046 | -0.624943 | 0.319016  |
| 1  | -1.716623 | -1.967204 | 0.094242  |
| 8  | 1.024904  | -1.712151 | 0.247821  |
| 8  | 1.684036  | 0.980723  | -0.426566 |
| 8  | 0.327530  | 0.241461  | 2.013323  |
| 8  | -1.039759 | 1.706250  | 0.058103  |
| 8  | -1.676090 | -1.040888 | 0.401800  |
| 8  | -0.191014 | -0.331985 | -1.948119 |
| 8  | 3.703392  | -0.855661 | 0.221983  |
| 1  | 4.379003  | -1.032285 | -0.450701 |
| 1  | 4.173983  | -0.926112 | 1.066720  |
| 8  | -3.735342 | 0.908755  | 0.200121  |
| 1  | -4.221194 | 1.109939  | 1.015048  |
| 1  | -4.403268 | 0.973395  | -0.499684 |
| 8  | 0.881134  | 3.693539  | -0.393045 |
| 1  | 1.020028  | 4.200488  | -1.207866 |
| 1  | 1.051439  | 4.328043  | 0.320169  |
| 8  | -0.919560 | -3.628257 | -0.406459 |
| 1  | -1.047003 | -4.367267 | 0.208443  |
| 1  | -1.071401 | -4.009998 | -1.284274 |

-----

Cartesian coordinates of : 631-1.log

-----  
Atomic number (AN) and Cartesian coordinates

| AN | X         | Y         | Z         |
|----|-----------|-----------|-----------|
| 1  | 0.524959  | -2.025917 | 1.562537  |
| 1  | 1.643877  | -0.923976 | 1.295935  |
| 1  | 1.797198  | 1.108028  | 0.254654  |
| 1  | 0.817786  | 2.046269  | -0.608253 |
| 1  | -1.503605 | 2.084498  | -1.015376 |
| 1  | -2.774356 | 1.223598  | -0.674862 |
| 1  | -0.475999 | 0.746033  | 2.937935  |
| 1  | -1.363127 | 1.810980  | 2.227167  |
| 26 | -0.625659 | 0.081780  | 0.410226  |
| 1  | -2.460146 | -1.853740 | 0.095928  |
| 1  | -2.716927 | -1.146665 | 1.496308  |
| 1  | -0.891283 | -1.537566 | -1.650798 |
| 1  | 0.564018  | -0.957675 | -1.708756 |
| 1  | 3.740933  | -0.401854 | 0.240169  |
| 1  | 3.650854  | 0.319263  | 1.621795  |
| 1  | 5.275837  | -0.629861 | -1.560125 |
| 1  | 5.132068  | -1.987195 | -0.853005 |
| 8  | 3.107133  | -0.003220 | 0.887791  |
| 8  | -0.332431 | -0.776446 | -1.394396 |
| 8  | -1.084248 | 0.883740  | 2.196656  |
| 8  | 0.676600  | -1.087375 | 1.389976  |
| 8  | 0.866420  | 1.368175  | 0.089436  |
| 8  | -1.881414 | 1.443503  | -0.376964 |
| 8  | 4.685285  | -1.140283 | -0.989134 |
| 8  | -2.091193 | -1.246011 | 0.765440  |
| 8  | -0.227947 | 3.184514  | -1.780326 |
| 1  | -0.270364 | 4.124867  | -1.546347 |
| 1  | -0.096390 | 3.174418  | -2.740641 |
| 8  | -2.353728 | -2.745968 | -1.571942 |
| 1  | -3.052037 | -2.643172 | -2.237132 |
| 1  | -2.191971 | -3.701654 | -1.535301 |

-----  
Cartesian coordinates of : 631-2.log

-----  
Atomic number (AN) and Cartesian coordinates

| AN | X         | Y         | Z         |
|----|-----------|-----------|-----------|
| 1  | -2.032642 | -2.402395 | -0.963883 |
| 1  | -2.658498 | -2.322216 | 0.464000  |
| 1  | -3.758320 | 0.502062  | -0.797928 |
| 1  | -3.013932 | 1.857876  | -0.546742 |
| 1  | 0.267369  | 2.080359  | -0.005256 |
| 1  | -0.421239 | 2.094226  | 1.401229  |
| 1  | -1.071873 | 0.220718  | -2.468213 |
| 1  | 0.191341  | -0.592280 | -1.929608 |
| 26 | -1.299083 | -0.054289 | 0.158499  |
| 1  | 1.216712  | -0.576191 | 0.644473  |
| 1  | 0.421715  | -1.914398 | 0.637531  |

---

|   |           |           |           |
|---|-----------|-----------|-----------|
| 1 | -2.790310 | 0.272078  | 2.386503  |
| 1 | -1.458397 | -0.461101 | 2.775451  |
| 8 | 0.325084  | -0.974502 | 0.852285  |
| 8 | -0.537969 | 0.043172  | -1.682367 |
| 8 | -0.512363 | 1.755632  | 0.499765  |
| 8 | -2.996667 | 0.908025  | -0.359599 |
| 8 | -2.029657 | -0.212123 | 2.033798  |
| 8 | -2.248861 | -1.797305 | -0.239882 |
| 8 | 1.456448  | -1.635132 | -1.923190 |
| 1 | 1.816983  | -2.139014 | -2.665853 |
| 1 | 2.203989  | -1.206617 | -1.464079 |
| 8 | 2.661884  | -0.031768 | 0.013466  |
| 1 | 3.512690  | -0.229600 | 0.476110  |
| 1 | 2.679800  | 0.910469  | -0.226537 |
| 8 | 1.822374  | 2.657258  | -0.750814 |
| 1 | 2.240599  | 3.446740  | -0.372938 |
| 1 | 1.816284  | 2.819745  | -1.706411 |
| 8 | 5.005545  | -0.641515 | 1.221778  |
| 1 | 5.228683  | -0.642408 | 2.161604  |
| 1 | 5.818672  | -0.880479 | 0.757659  |

---

Cartesian coordinates of : 541-1.log

---

Atomic number (AN) and Cartesian coordinates

| AN | X         | Y         | Z         |
|----|-----------|-----------|-----------|
| 8  | -0.904468 | 1.355248  | -1.010918 |
| 1  | -0.756250 | 2.310957  | -0.880801 |
| 26 | 0.291177  | 0.007667  | -0.213299 |
| 8  | 1.620057  | -1.364607 | 0.344484  |
| 1  | 2.568440  | -1.134265 | 0.407281  |
| 8  | -0.890627 | -1.406647 | -0.919035 |
| 1  | -0.691735 | -2.359425 | -0.869693 |
| 1  | -1.854843 | 1.157714  | -1.126058 |
| 1  | 1.518718  | -2.291184 | 0.048765  |
| 1  | -1.839235 | -1.238740 | -1.084889 |
| 8  | 1.632335  | 1.417829  | 0.147666  |
| 1  | 2.581010  | 1.244346  | 0.290326  |
| 1  | 1.463828  | 2.363430  | -0.027652 |
| 8  | -3.272240 | -0.054499 | -1.001629 |
| 1  | -4.008823 | -0.058005 | -1.630872 |
| 1  | -3.659962 | -0.059174 | -0.107699 |
| 8  | 4.036622  | 0.039330  | 0.563274  |
| 1  | 4.496647  | 0.068478  | 1.416485  |
| 1  | 4.744997  | 0.015000  | -0.098502 |
| 8  | 0.580311  | -3.776819 | -0.634884 |
| 1  | 0.413426  | -4.516833 | -0.031125 |
| 1  | 0.882884  | -4.192978 | -1.457033 |
| 8  | 0.377568  | 3.807391  | -0.550112 |
| 1  | 0.159508  | 4.471560  | 0.121499  |
| 1  | 0.625363  | 4.319413  | -1.335588 |
| 8  | -0.513847 | 0.121338  | 1.586311  |
| 1  | -0.038622 | -0.294861 | 2.319051  |
| 1  | -1.472225 | -0.028695 | 1.729211  |

|   |           |           |          |
|---|-----------|-----------|----------|
| 8 | -3.326766 | -0.106258 | 1.874856 |
| 1 | -3.716770 | -0.883028 | 2.305177 |
| 1 | -3.698519 | 0.648512  | 2.357773 |

-----

Cartesian coordinates of : 442-1.log

-----

Atomic number (AN) and Cartesian coordinates

| AN | X         | Y         | Z         |
|----|-----------|-----------|-----------|
| 8  | 1.256911  | 1.499689  | 0.377572  |
| 1  | 2.176689  | 1.340386  | 0.062284  |
| 26 | -0.000008 | -0.000001 | 0.251159  |
| 8  | -1.256924 | -1.499696 | 0.377558  |
| 1  | -0.963819 | -2.383163 | 0.078799  |
| 8  | -1.352816 | 1.104543  | -0.540859 |
| 1  | -2.268704 | 0.770543  | -0.710523 |
| 1  | 0.963810  | 2.383160  | 0.078821  |
| 1  | -2.176699 | -1.340397 | 0.062262  |
| 1  | -1.237793 | 2.054295  | -0.745383 |
| 8  | 1.352845  | -1.104574 | -0.540744 |
| 1  | 1.237808  | -2.054313 | -0.745319 |
| 1  | 2.268722  | -0.770563 | -0.710447 |
| 8  | -0.274710 | 3.645680  | -0.642675 |
| 1  | -0.058289 | 4.116084  | -1.462696 |
| 1  | -0.582702 | 4.335975  | -0.034613 |
| 8  | 0.274686  | -3.645686 | -0.642684 |
| 1  | 0.582667  | -4.335989 | -0.034626 |
| 1  | 0.058290  | -4.116078 | -1.462719 |
| 8  | -3.549387 | -0.389361 | -0.611622 |
| 1  | -4.286545 | -0.203474 | 0.029114  |
| 1  | -3.980974 | -0.686706 | -1.426273 |
| 8  | 3.549372  | 0.389377  | -0.611607 |
| 1  | 4.286552  | 0.203497  | 0.029108  |
| 1  | 3.980932  | 0.686708  | -1.426278 |
| 8  | 5.468620  | -0.132327 | 1.174517  |
| 1  | 5.854185  | 0.520298  | 1.774209  |
| 1  | 6.114633  | -0.848656 | 1.113845  |
| 8  | -5.468578 | 0.132354  | 1.174560  |
| 1  | -5.854125 | -0.520255 | 1.774281  |
| 1  | -6.114589 | 0.848685  | 1.113900  |

-----

Cartesian coordinates of : 433-1.log

-----

Atomic number (AN) and Cartesian coordinates

| AN | X         | Y         | Z         |
|----|-----------|-----------|-----------|
| 1  | -0.807163 | -1.466449 | 1.104454  |
| 1  | 0.807210  | -1.466462 | 1.104369  |
| 1  | 1.212282  | 1.619469  | -0.437899 |
| 1  | 1.982423  | 0.373457  | 0.243618  |
| 1  | -1.212233 | 1.619544  | -0.437720 |
| 1  | -1.982374 | 0.373567  | 0.243876  |

---

|    |           |           |           |
|----|-----------|-----------|-----------|
| 26 | -0.000084 | -0.450343 | -1.062794 |
| 1  | -2.623446 | -0.541924 | 2.417079  |
| 1  | -3.182919 | -1.428381 | 1.258949  |
| 1  | 3.183008  | -1.428439 | 1.258720  |
| 1  | 2.623605  | -0.541880 | 2.416802  |
| 1  | 0.000009  | 3.598422  | -1.125413 |
| 1  | 0.000103  | 3.544335  | 0.427219  |
| 1  | 0.783303  | 0.436404  | -3.460087 |
| 1  | -0.783760 | 0.436465  | -3.459971 |
| 8  | 1.480389  | 0.677144  | -0.549221 |
| 8  | 0.000046  | 2.973894  | -0.384672 |
| 8  | -1.480411 | 0.677234  | -0.549014 |
| 8  | -2.433235 | -0.827374 | 1.511379  |
| 8  | -0.000006 | -1.541596 | 0.542518  |
| 8  | 2.433344  | -0.827399 | 1.511134  |
| 8  | -0.000191 | 0.333135  | -2.899159 |
| 8  | -4.367792 | -2.473551 | 0.666913  |
| 1  | -4.447277 | -3.399238 | 0.934633  |
| 1  | -5.261582 | -2.193449 | 0.427189  |
| 8  | 4.367875  | -2.473664 | 0.666809  |
| 1  | 5.261659  | -2.193593 | 0.427024  |
| 1  | 4.447357  | -3.399329 | 0.934605  |
| 8  | 0.000179  | 4.464558  | 1.857953  |
| 1  | -0.769499 | 4.953678  | 2.179077  |
| 1  | 0.769897  | 4.953657  | 2.179010  |

---

Cartesian coordinates of : 442-2.log

---

Atomic number (AN) and Cartesian coordinates

| AN | X         | Y         | Z         |
|----|-----------|-----------|-----------|
| 1  | 1.136716  | 2.325246  | -0.284986 |
| 1  | 2.224820  | 1.126064  | -0.568825 |
| 1  | -2.224834 | 1.126063  | 0.568773  |
| 1  | -1.136737 | 2.325249  | 0.284932  |
| 1  | 1.136738  | -2.325250 | -0.284924 |
| 1  | 2.224836  | -1.126064 | -0.568763 |
| 26 | -0.000001 | -0.000001 | 0.000001  |
| 1  | -2.224825 | -1.126069 | 0.568820  |
| 1  | -1.136718 | -2.325250 | 0.284992  |
| 1  | 0.185213  | 4.378008  | 0.746952  |
| 1  | -0.185189 | 4.378074  | -0.746827 |
| 1  | 0.185175  | -4.378074 | 0.746838  |
| 1  | -0.185227 | -4.378008 | -0.746942 |
| 8  | 1.297294  | 1.361698  | -0.325476 |
| 8  | 0.000007  | 3.787487  | 0.000038  |
| 8  | -1.297325 | 1.361700  | 0.325359  |
| 8  | -1.297294 | -1.361701 | 0.325488  |
| 8  | 1.297322  | -1.361701 | -0.325366 |
| 8  | -0.000019 | -3.787487 | -0.000028 |
| 8  | 3.522630  | -0.000007 | -0.928236 |
| 1  | 3.879097  | -0.000016 | -1.829338 |
| 1  | 4.314942  | 0.000003  | -0.327977 |
| 8  | -3.522633 | 0.000006  | 0.928241  |



---

|   |           |           |           |
|---|-----------|-----------|-----------|
| 1 | -3.879108 | 0.000014  | 1.829339  |
| 1 | -4.314938 | 0.000007  | 0.327974  |
| 8 | 5.624480  | 0.000006  | 0.726584  |
| 1 | 6.165343  | -0.770965 | 0.943423  |
| 1 | 6.165347  | 0.770968  | 0.943446  |
| 8 | -5.624459 | 0.000001  | -0.726608 |
| 1 | -6.165359 | -0.770958 | -0.943400 |
| 1 | -6.165293 | 0.770976  | -0.943506 |

---
